# Supplementary material for: Chemical Interrogation of Nuclear Size Identifies Compounds with Cancer Cell Line-Specific Effects on Migration and Invasion
Source: PubMed Central journal article supplement — ACS Chem Biol. 2022 Feb 24;17(3):680–700. doi: 10.1021/acschembio.2c00004 (PMC8938924; doi:10.1021/acschembio.2c00004), 2022-02-24
Supplement: cb2c00004_si_001.pdf [file cb2c00004_si_001.pdf]

## Supplementary Results, Figures and Tables for:

### Chemical interrogation of nuclear size identifies compounds with cancer cell line-specific effects on migration and invasion

Sylvain Tollis<sup>1,3,†,\*</sup>, Andrea Rizzotto<sup>2,†</sup>, Nhan T. Pham<sup>4</sup>, Sonja Koivukoski<sup>1</sup>, Aishwarya Sivakumar<sup>2</sup>, Steven Shave<sup>4</sup>, Jan Wildenhain<sup>4</sup>, Nikolaj Zuleger<sup>2</sup>, Jeremy T. Keys<sup>5</sup>, Jayne Culley<sup>6</sup>, Yijing Zheng<sup>4,#</sup>, Jan Lammerding<sup>5</sup>, Neil O. Carragher<sup>6</sup>, Valerie G. Brunton<sup>6</sup>, Leena Latonen<sup>1</sup>, Manfred Auer<sup>4</sup>, Mike Tyers<sup>3,\*</sup>, and Eric C. Schirmer<sup>2,\*</sup>

<sup>1</sup>Institute of Biomedicine, University of Eastern Finland, Kuopio, 70210, Finland. <sup>2</sup>The Institute of Cell Biology, University of Edinburgh, Edinburgh, EH9 3BF, UK. <sup>3</sup>Institute for Research in Immunology and Cancer, Université de Montréal, Montréal, H3T 1J4, Canada. <sup>4</sup>Institute of Quantitative Biology, Biochemistry and Biotechnology, University of Edinburgh, Edinburgh, EH9 3BF, UK. <sup>5</sup>Nancy E. and Peter C. Meinig School of Biomedical Engineering & Weill Institute for Cell and Molecular Biology, Cornell University, Ithaca NY, 14853, USA. <sup>6</sup>Edinburgh Cancer Research UK Centre, Institute of Genetics and Molecular Medicine, University of Edinburgh, Edinburgh EH4 2XR, UK. #Current address: University of Manchester, UK

† These authors made equal contributions; \*Correspondence to:

Eric Schirmer, Institute of Cell Biology, University of Edinburgh, Kings Buildings, Michael Swann Bldg., Max Born Crescent, Edinburgh EH9 3BF, UK.

Tel: +44(131)6507075; e.schirmer@ed.ac.uk (nuclear envelope),

Sylvain Tollis, Institute of Biomedicine, University of Eastern Finland, Kuopio, Finland

Tel: +358 (0) 503 419874; sylvain.tollis@uef.fi (data analysis and bioinformatics), or Mike

Tyers, Institute for Research in Immunology and Cancer, Université de Montréal, Montréal, Québec H3T 1J4, Canada

Tel: +1(514)3436668; md.tyers@umontreal.ca (size regulation).

## Complementary analyses of nuclear size chemical screen data

We calculated both the absolute nuclear size and the N/C ratio (nuclear-to-cytoplasm size ratio, i.e. relative nuclear size) from these data and then used two quantification strategies to analyze effects of compounds on both. These four analyses each yielded important insights that would have been missed if just one analysis approach had been undertaken. We first developed an average-based quantification strategy, as average nuclear size is traditionally used by cytologists to grade tumors. To implement this approach, the average values of the size metrics were determined across all imaged cells for each compound well and in-plate DMSO-treated controls. However, shifting the average metric values up or down does not obligatorily reflect loss of size regulation, but could reflect a change in the cell-regulated value to which the metric is set. Thus, to detect compounds that specifically disrupt nuclear size control by increasing the metric variance across a cell population, we also analyzed the same data using an outlier-based approach, which yields complementary information. We computed for each well the fractions of cells with abnormally large or small metric value (i.e., outlier cells). The outlier metric value refers to values beyond the outlier thresholds defined using standard procedures with respect to the distribution of metric values for all in-plate DMSO control wells (see Fig. 1B and Methods). For the average-based and outlier-based methods, respectively, the average metric values and the fractions of outlier cells from all wells were analyzed statistically to identify hit compounds that perturb the metric beyond the typical metric variability across the library. Hit compounds were confirmed using direct comparison with in-plate DMSO controls in Wilcoxon rank statistical tests.

There was a strong overlap between compound sets identified using average-based versus outlier-based analyses for absolute nuclear size although the outlier-based method tended to identify more hits (Supplementary Fig. S2a, Table 1, compare Supplementary Tables 2, 5). The general convergence of these fundamentally different analysis methods underscores the robustness of our data while the differences between them might be biologically relevant. For example, average-based only hits might alter the nuclear size set

point but not homeostatic control whereas outlier-based only hits might perturb homeostasis but not the nuclear size set point. Likewise, analysis of the N/C ratio, which normalizes nuclear size changes relative to overall cell size, (Supplementary Tables 4, 6), identifies compounds that disrupts the correct scaling of the nuclear size to the cell size, even in situations where the absolute nuclear size is unaffected.

The screen data was entirely analysed using the four analysis methods (Supplementary Tables 2, 4, 5, 6). In the main text, results were mostly discussed using the absolute nuclear size metric and the average analysis methodology because this metric/methodology association gave the most reproducible results in our triplicate pilot screen (Supplementary Fig. S1; Supplementary Table 1). However, we also discussed results obtained using the alternative, complementary analyses in particular to emphasize on particular signatures of compound classes across cell lines and time points. These results, presented on Figs. 4, S3, S4, S5, provide insight on the mechanisms and dynamics of nuclear size rectification.

## **Supplementary Figures:**

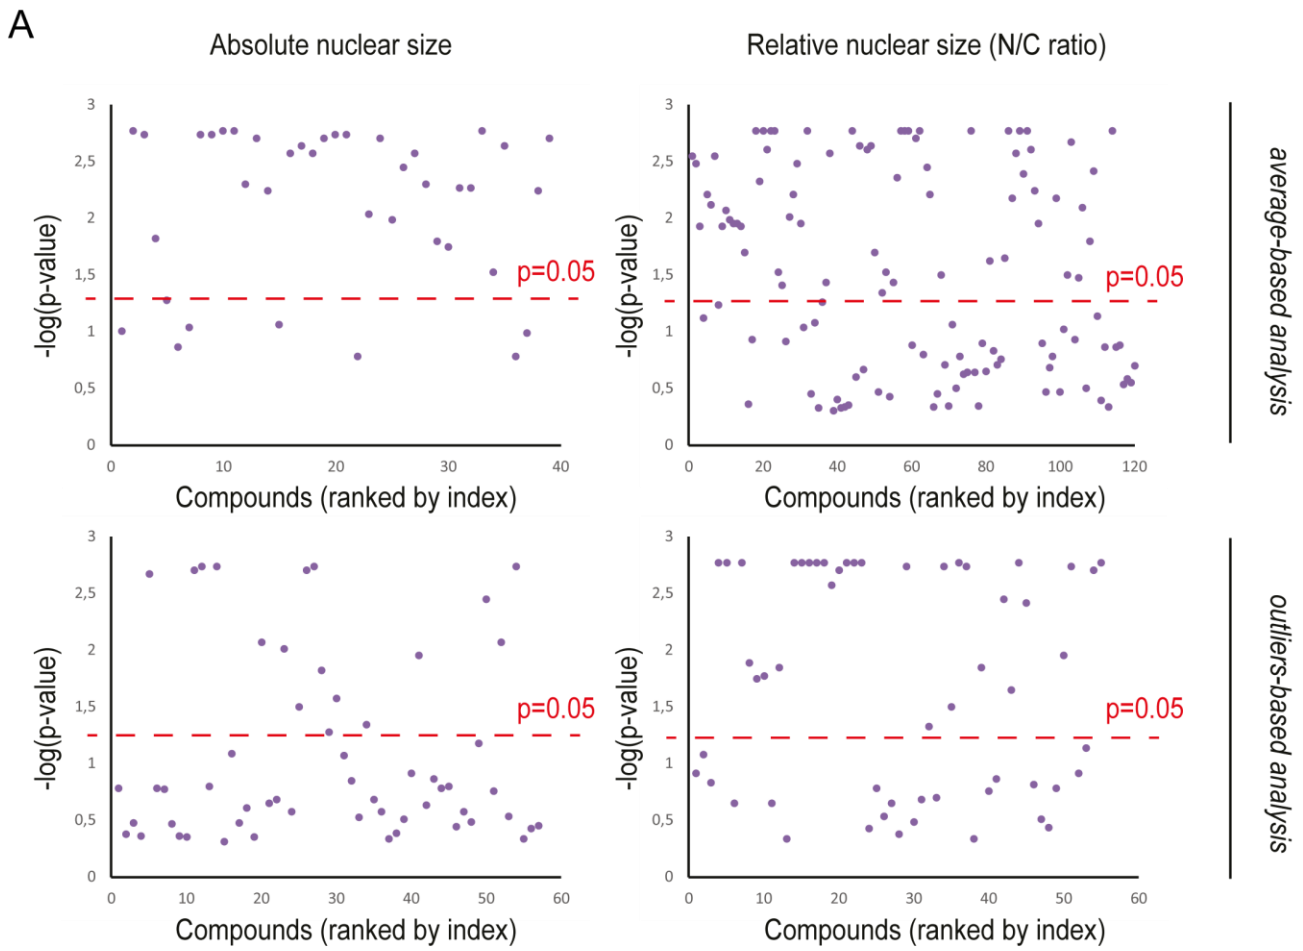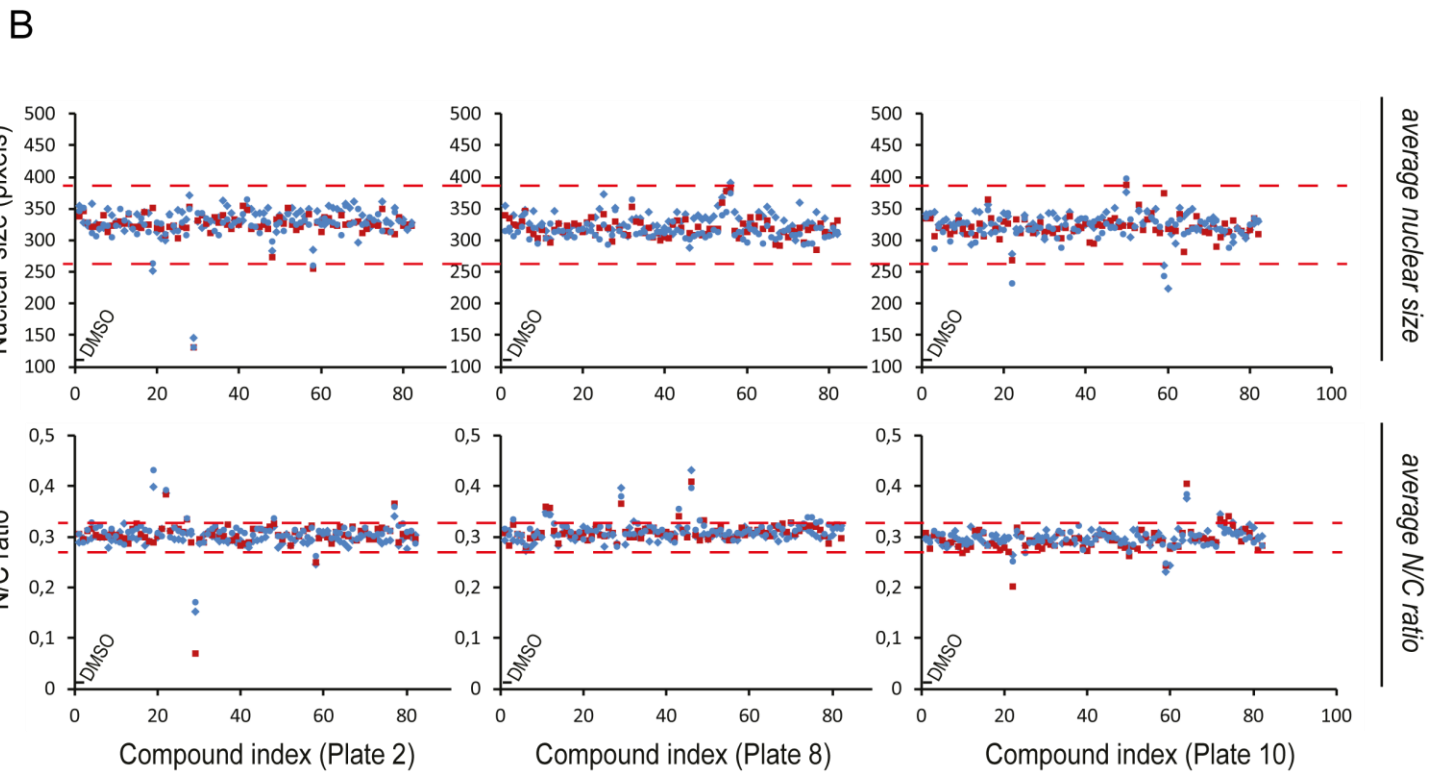

Tollis et al. Figure S1

### **Supplementary Figure S1. Screen data reproducibility.**

A. Scatter plots showing the Wilcoxon rank tests p-values (log scale, vertical axis) for each “hit” compound (horizontal axis) compared with DMSO across all replicates (see Methods). Tests were performed from the average nuclear size (left scatters) and N/C ratio metrics (right scatters) data acquired on PC3 cells with 6h treatment (3 replicates), and using average-based (top scatters) and outliers-based (bottom scatters) analyses. The significance level ( $p=0.05$ ) is shown as red dashed lines. B. Examples of raw data scatter plots showing the average nuclear size (top scatters) and average N/C ratio (bottom scatters) as directly output by our Matlab analysis scripts for compound plate 2 (left), plate 8 (middle) and plate 10 (right). Blue circle, blue diamond and red squares represent the 3 replicates (PC3 cells, 6h treatment). For each plate/replicate/metric, the first 2 dots of the scatter represent the value metric averaged over all in-plate DMSO control wells (16 wells), and compounds are then listed from A2, A3 ... A11, B2 ... to H11. Dashed lines indicate the hit detection thresholds for each metric, as determined for PC3 cells, 6h treatment (see Methods).

A

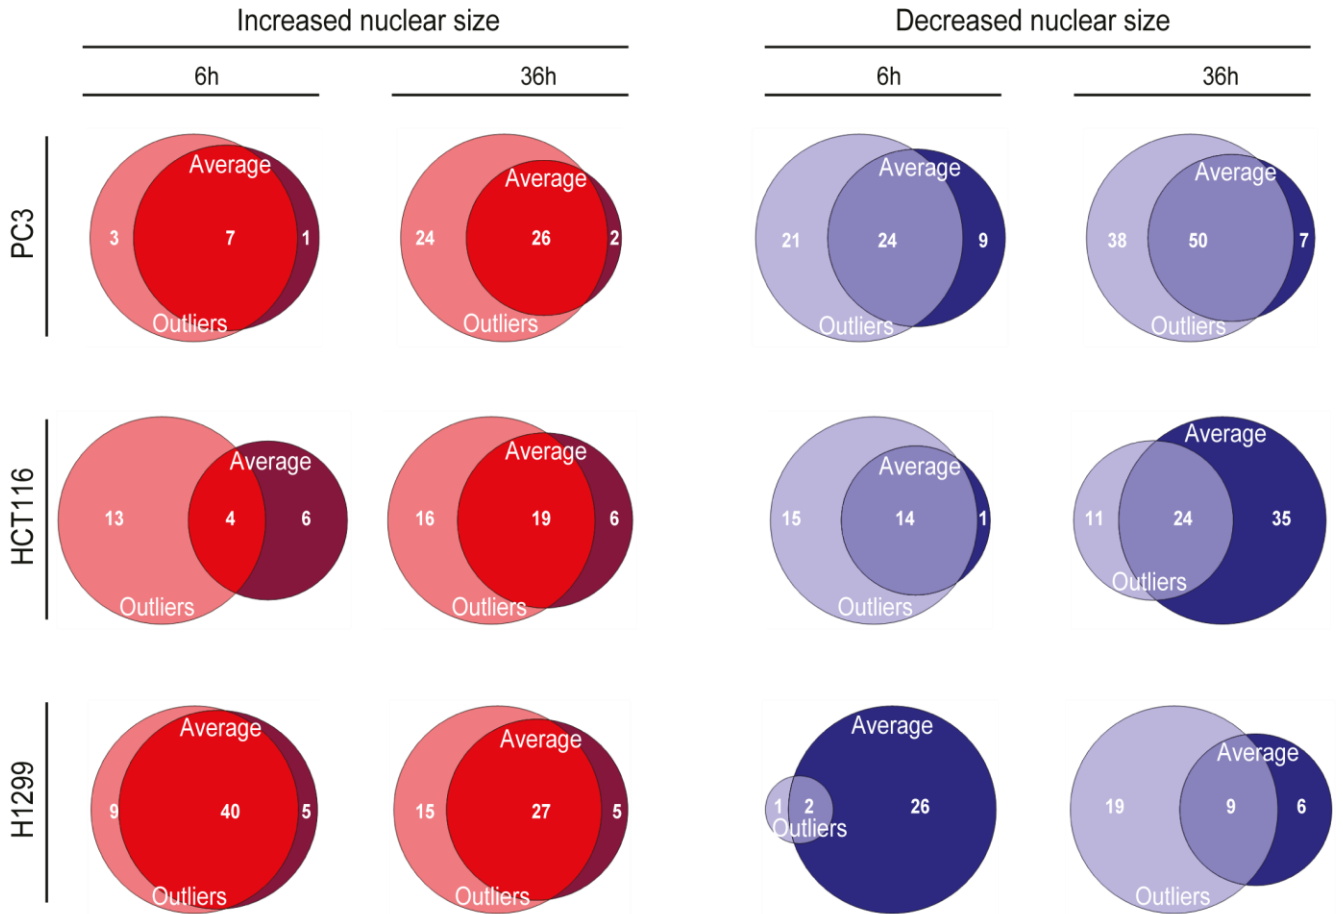

B

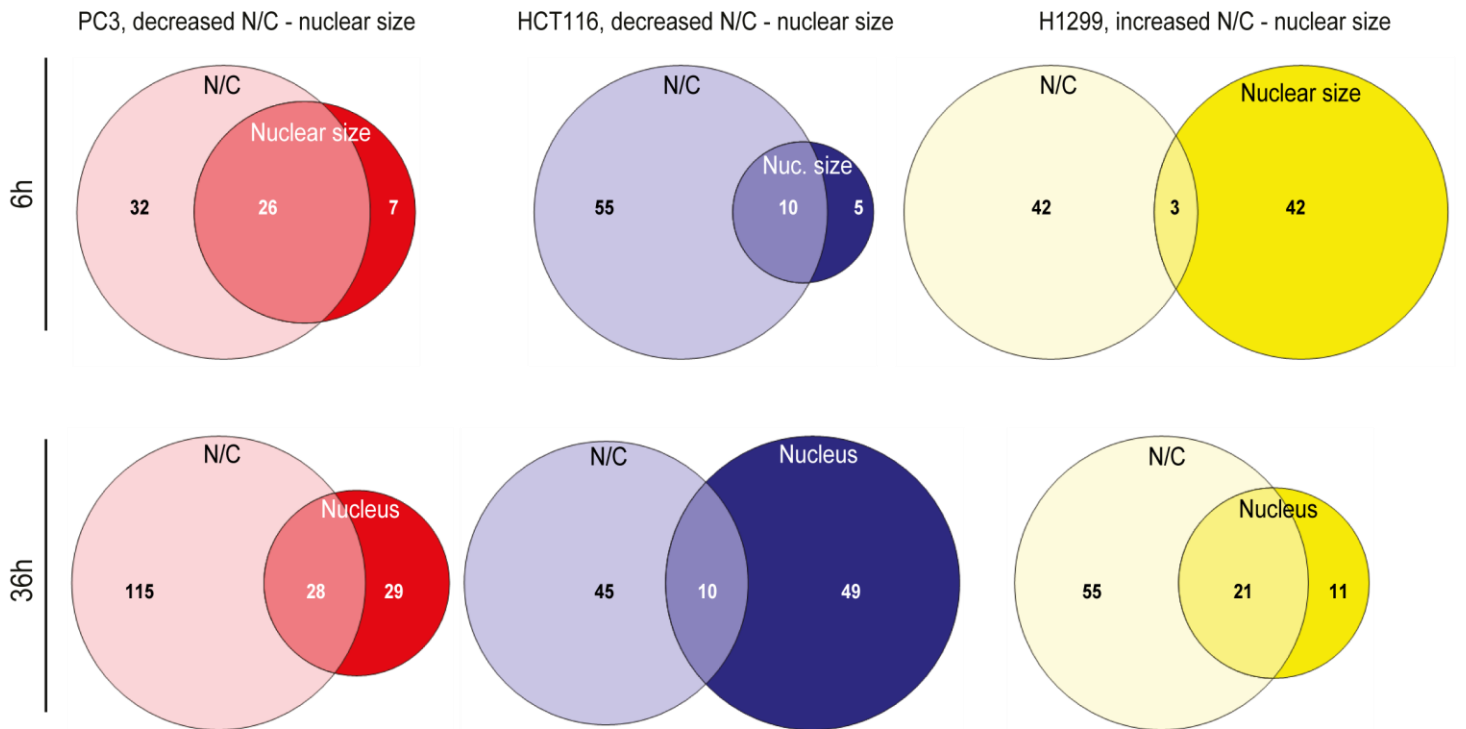

Tollis et al. Figure S2

**Supplementary Figure S2. Analysis methodology, but not the choice of metric, yielded overlapping results.**

A. Venn diagrams showing the overlap in compounds increasing (left diagrams, red) or reducing (right diagrams, blue) the absolute nuclear size, as determined by average-based (dark colours) or outlier-based (light colours) strategies as indicated. Overlaps in analysis methodologies were computed for PC3 (top), HCT116 (middle) and H1299 (bottom) cells treated for 6h or 36 h as indicated. B. Venn diagrams showing the overlap in compounds correcting cancer-related nuclear changes as determined using the average nuclear size (dark colours) vs average N/C ratio (light colours). Overlaps in hits determined using the two metrics were computed separately for PC3 (red), HCT116 (blue) and H1299 (yellow) cells treated for 6h (top row) or 36 h (bottom row) as indicated.

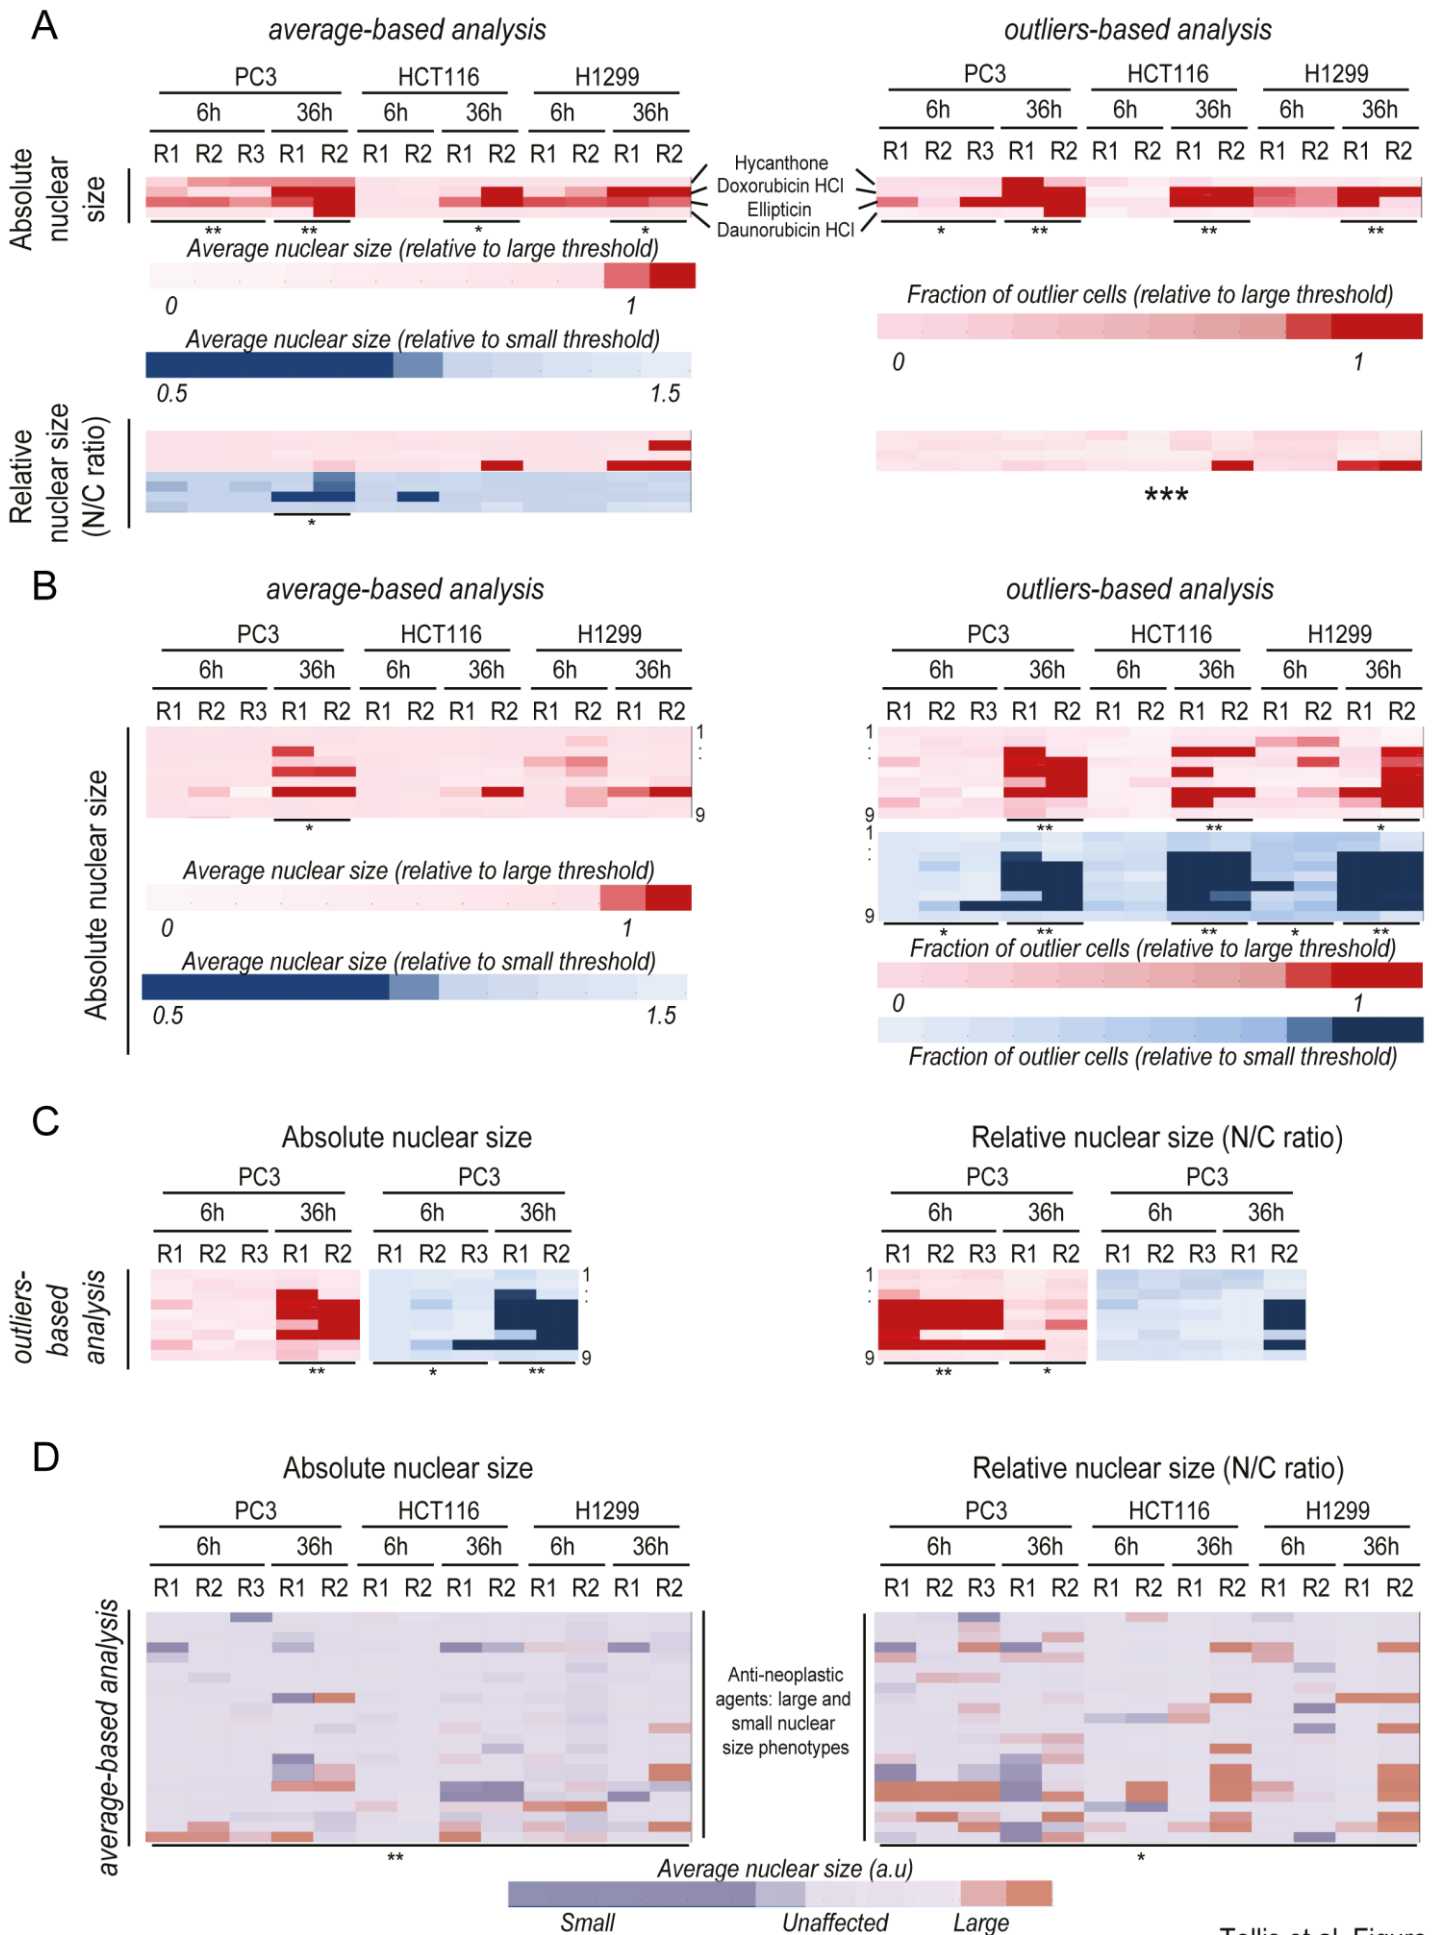



**Supplementary Figure S3. Comparison of absolute and relative nuclear size responses to different treatment duration informs on compound mechanism of action.**

Class enrichment scores larger than 95% (resp. 99%) are indicated as \* (resp. \*\*) for compound classes of interest for specific phenotypes (i.e. cell line/time point/direction of nuclear size change). A. Heat maps showing nuclear size (top maps) and the N/C ratio (bottom maps) across tumour type/replicates (horizontal) treated with DNA intercalating agents (vertical), as determined by average-based analysis (left) and outliers-based analysis (right). Both averages, and the fractions of outlier cells for nuclear size and N/C ratio metrics were normalized to the detection thresholds for large/small nucleus or N/C ratio (see Methods), and colour-coded as indicated. Darker colours correspond to stronger phenotypes. Data for the fraction of outlier cells with abnormally small N/C ratio couldn't be determined due to renormalization issues (\*\*\*, see Methods). B. Heat maps showing absolute nuclear size across tumour type/replicates (horizontal) treated with microtubule poisons (vertical), as determined by outliers-based analysis (right) and average-based analysis (left). Compounds are indicated as numbers: 1-lumicolchicine  $\gamma$ , 2-tiabendazole, 3-fenbendazole, 4-colchicine; 5-nocodazole, 6-paclitaxel, 7-albendazole, 8-podophyllotoxin, 9-trimethylcolchicinic acid. Data normalization and colour-coding were performed similarly to panel (A). C. Heat maps showing absolute nuclear size (left) and relative nuclear size (N/C ratio, right) across PC3 replicates (horizontal) treated with microtubule poisons (vertical), as determined by outliers-based analysis. Compounds are numbered as on panel (B). Fractions of outlier cells data was normalized and colour-coded as indicated on panel (B). D. Heat maps showing the mean nuclear size (left) and the mean N/C ratio (right) across tumour type/replicates (horizontal) treated with all Prestwick compounds documented as antineoplastic. Nuclear size and N/C ratio have been normalized to both the detection thresholds for large (yielding a red heat map) and for small nucleus (yielding a blue heat map), both of which have been colour-coded as indicated. Then, both red and blue heat maps have been superimposed to yield the multi-colour heat map shown. Almost all antineoplastic agents affect the absolute nuclear size and/or the N/C ratio

in at least one condition as reflected by large class enrichment scores computed across all conditions.

A

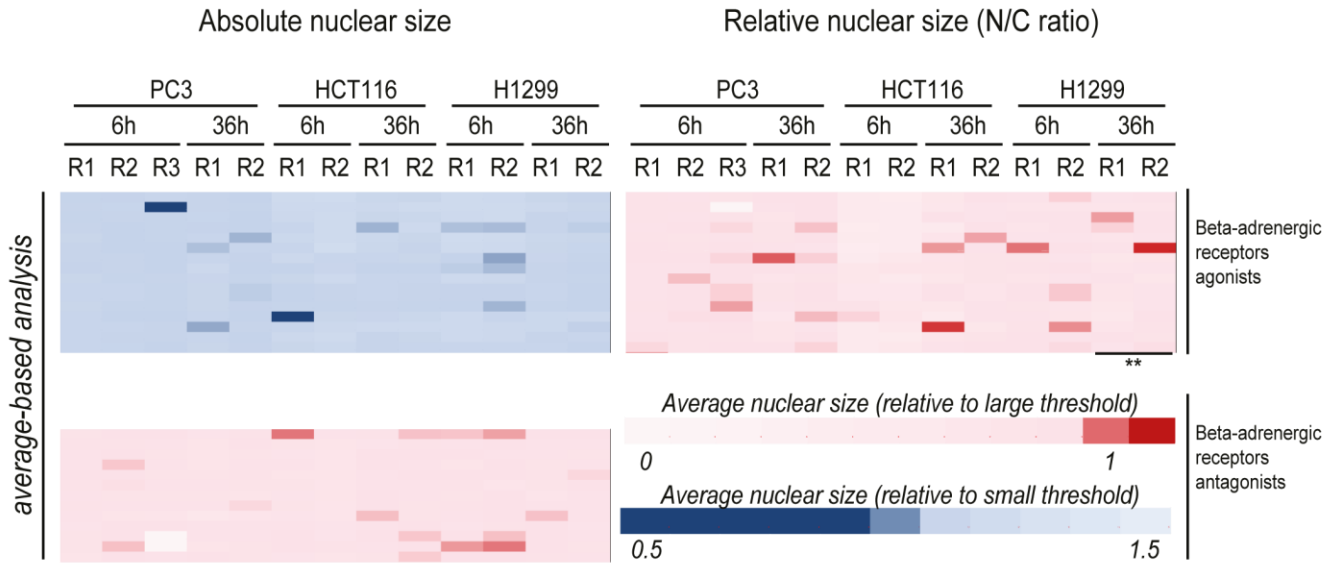

B

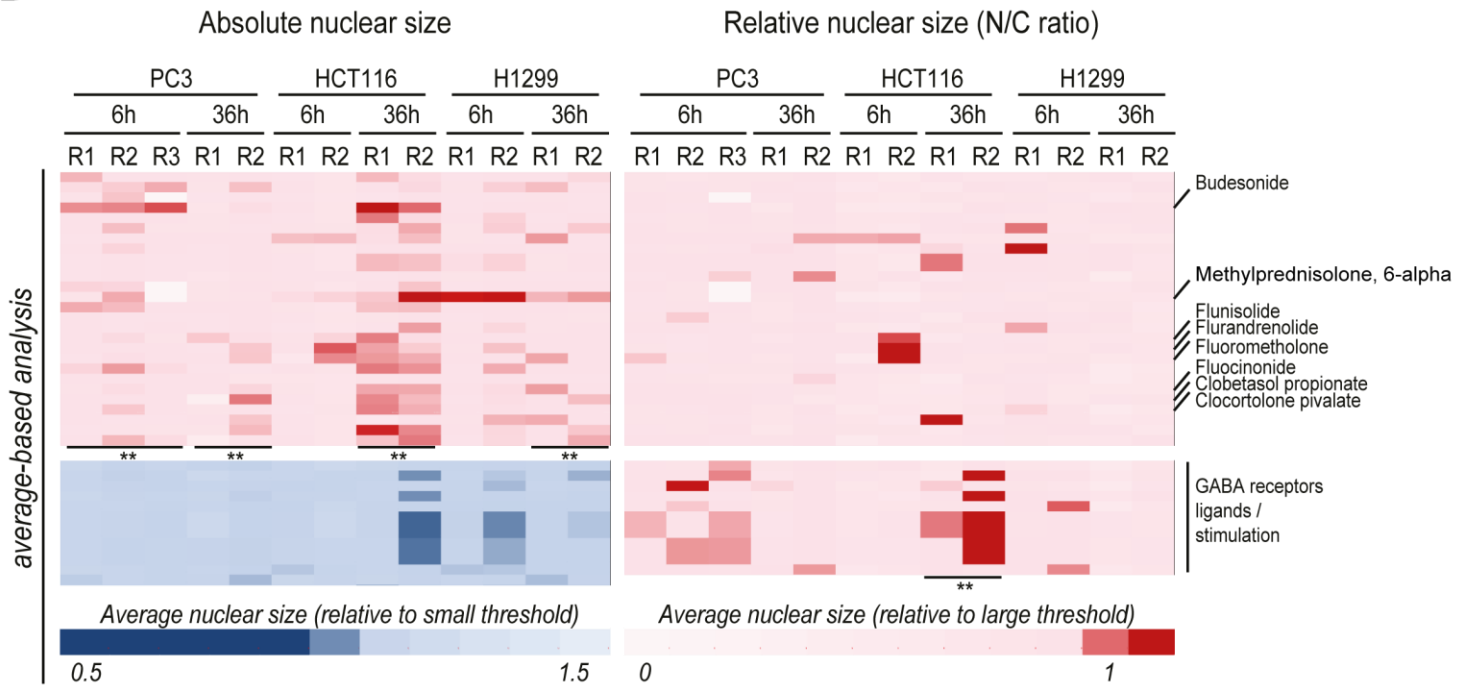

**Supplementary Figure S4. On the importance of knowing which of absolute or relative nuclear size actively contributes to metastasis.**

Class enrichment scores larger than 95% (resp. 99%) are indicated as \* (resp. \*\*) for compound classes of interest for specific phenotypes. A. Heat maps showing the mean nuclear size (left) and the mean N/C ratio (right) across tumour type/replicates (horizontal) treated with beta-adrenergic receptor agonists (top heat maps) or beta-adrenergic receptor antagonists (bottom heat map). Both heat maps show particular regions from Fig. 3, magnified for better visualization. Nuclear size and N/C ratio were normalized to the detection thresholds for large nucleus (red heat maps, see Methods), or for small nucleus (blue heat maps), and colour-coded as indicated. B. Heat maps showing the mean nuclear size (left) and the mean N/C ratio (right) across tumour type/replicates (horizontal) treated with glucocorticoids (top heat maps) or GABA receptor ligands/stimulators (bottom heat map). Nuclear size and N/C ratio were normalized to the detection thresholds for large nucleus or N/C (red heat maps, see Methods), or for small nucleus or N/C (blue heat maps), and colour-coded as indicated. Some compounds of particular interest are indicated on the side.

A

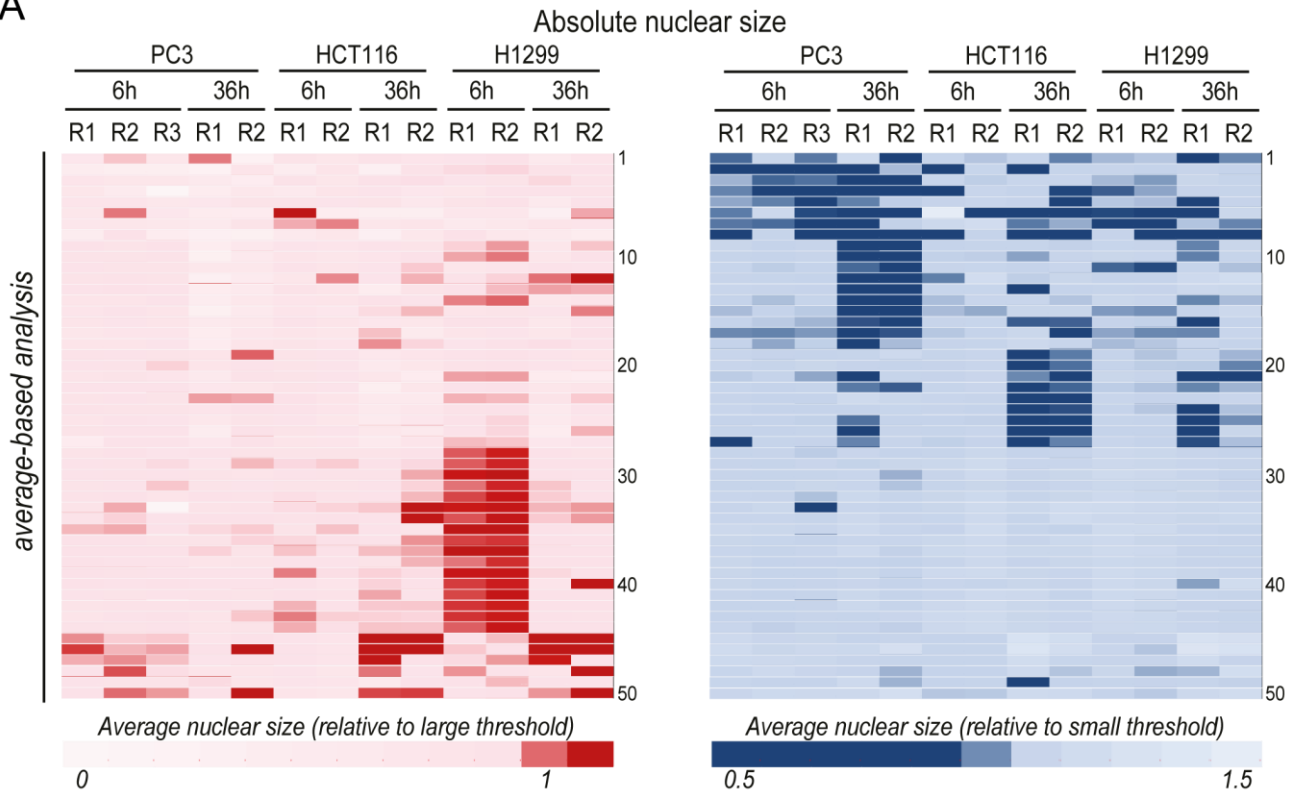

|    |                     |    |                  |    |                                  |    |                     |
|----|---------------------|----|------------------|----|----------------------------------|----|---------------------|
| 1  | Disulfiram          | 14 | Emetine di-HCl   | 27 | Azacytidine 5                    | 40 | Proscillaridin A    |
| 2  | Tomatine            | 15 | Piperlongumine   | 28 | Hydroflumethiazide               | 41 | Etilefrin HCl       |
| 3  | Astemizole          | 16 | Lycorine HCl     | 29 | Metaraminol bitartrate           | 42 | Letrozole           |
| 4  | Perhexiline maleate | 17 | Sertraline       | 30 | Flufenamic acid                  | 43 | (+,-)-Synephrine    |
| 5  | Ebselen             | 18 | Paroxetin HCl    | 31 | Trimethoprim                     | 44 | Verteporfin         |
| 6  | Alexidine di-HCl    | 19 | Danazol          | 32 | Fenspiride HCl                   | 45 | Monobenzone         |
| 7  | Cantharidin         | 20 | Griseofulvin     | 33 | Methylprednisolone 6- $\alpha$   | 46 | Trifluridine        |
| 8  | Oxyphenbutazone     | 21 | Puromycin di-HCl | 34 | Debrisoquin sulfate              | 47 | Antimycin A         |
| 9  | Anisomycin          | 22 | Resveratrol      | 35 | Harmol HCl mono-H <sub>2</sub> O | 48 | Mitoxantrone di-HCl |
| 10 | Roxatidine acetate  | 23 | Cilostazol       | 36 | Metoxy-6-harmalan                | 49 | Parbendazole        |
| 11 | Metixene HCl        | 24 | Eburnamonine     | 37 | Levonordefrin                    | 50 | Camptothecine (S,+) |
| 12 | Parthenolide        | 25 | Monensin Na salt | 38 | N-acetyl-L-leucine               |    |                     |
| 13 | Prenylamine lactate | 26 | Dienestrol       | 39 | (+)-Isoproterenol bitartrate     |    |                     |

B

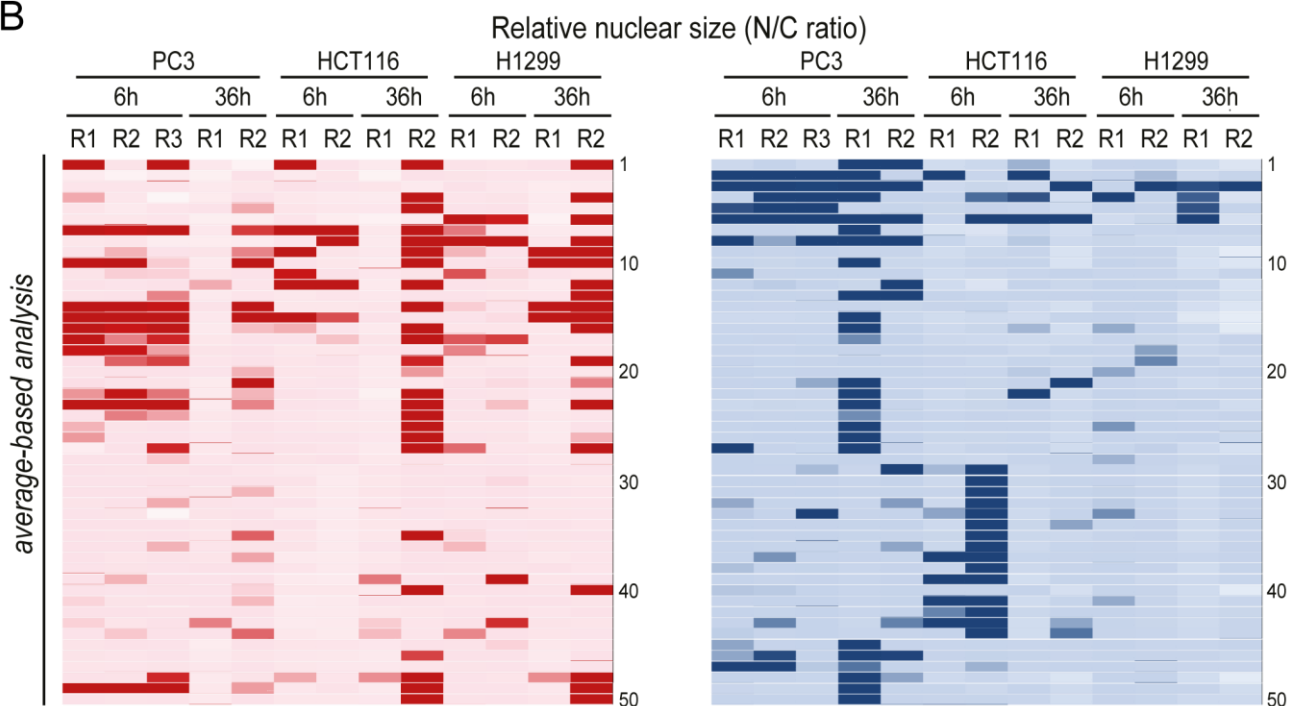

Tollis et al.  
Figure S5

**Supplementary Figure S5. Individual compounds spanning many pharmacological classes can correct cancer-associated nuclear size changes.**

A. Heat maps showing the mean nuclear size (A) and the mean N/C ratio (B) across tumour type/replicates (horizontal) treated with the Prestwick compounds (individual rows) that showed the strongest effects in one or several conditions (as listed in Table 1). For clarity, compounds are labeled with numbers on heat maps and listed in the Table shown on panel (A). Cell population-averaged nuclear size and N/C ratio have been normalized to both the detection thresholds for large (yielding a red heat map) and for small nucleus (yielding a blue heat map), and colour-coded as indicated.

A

H1299-specific NSR target network

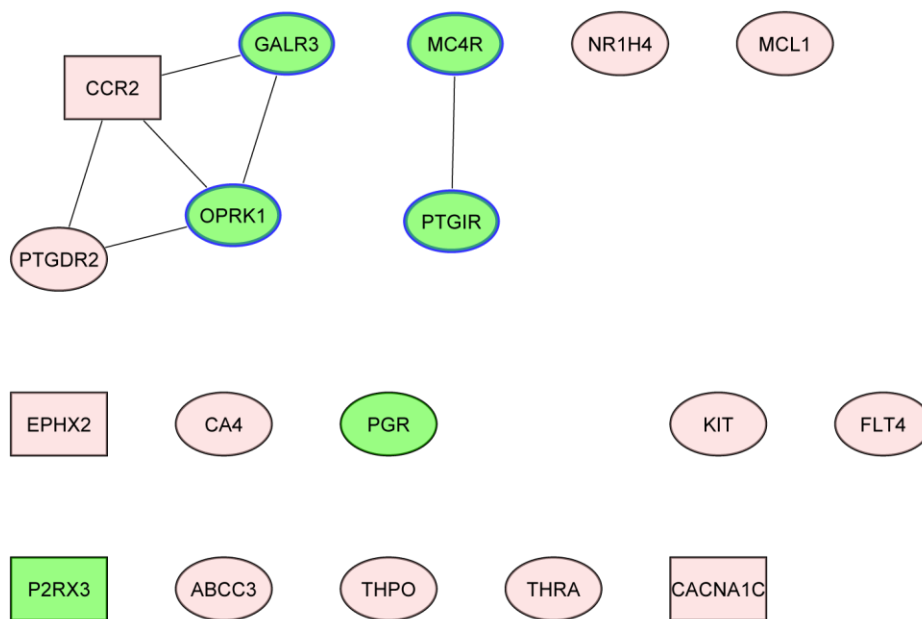

B

HCT116-specific NSR target network

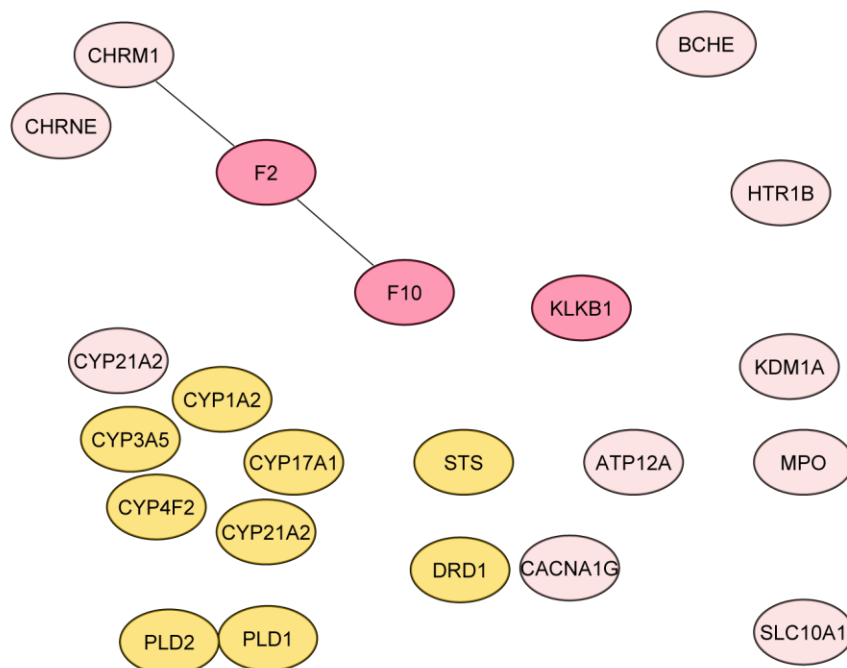

**Supplementary Figure S6. Cell line-specific NSRs target specific protein networks, additional data.** **a** Network targeted by H1299-specific NSRs. Only compounds that were not NSR in any condition in any of the two other cell lines were included. Default node colour is pink, default node shape is elliptic. Green nodes represent the cell-cell communication and signaling GO terms (7154; 7267); nodes circled in blue represent regulation of cAMP metabolic process (e.g. 30817; 30814) and of adenylate cyclase activity (e.g. 7194; 45761; 31279), and G-protein signaling, coupled to cyclic nucleotide second messenger (7187); Square nodes represent cellular ion homeostasis GO terms (6873; 6874). **b** Network targeted by HCT116-specific NSRs. Only compounds that were not NSR in any condition in any of the two other cell lines were included. Default node colour is light pink. Yellow nodes represent proteins belonging to the lipid metabolism/catabolism GO terms (6629; 16042), and dark red nodes the hemostasis GO term (7599).



**A**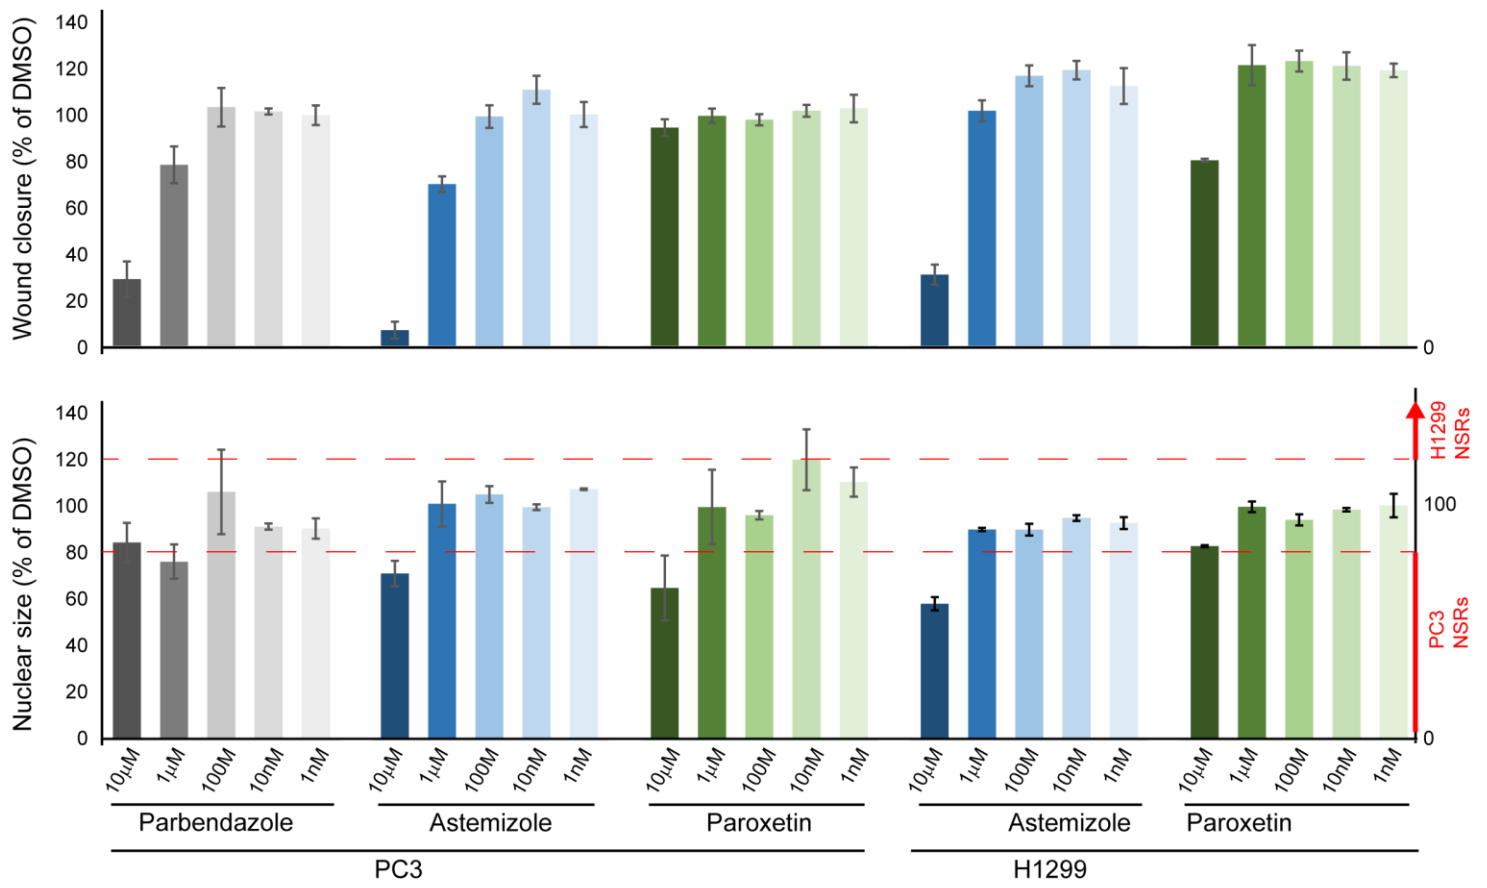

**Supplementary Figure S7. NSR compounds affecting nuclear size also affect cell migration, additional data. a** Wound healing assay. Top row: wound confluence, in % of the wound confluence of DMSO-treated control cells, for PC3 and H1299 cells treated with varying concentrations of Parabendazole, Astemizole and Paroxetine (from left to right) as indicated below the bottom row. Bottom row: average nuclear size, in % of the average nuclear size of DMSO-treated control cells, for PC3 and H1299 cells in the indicated conditions. Dashed red lines represent cutoff values for strong NSR phenotypes (see Supplementary Fig. S8a) for PC3 (20% reduction of nuclear size vs DMSO) and H1299 (20% increase of nuclear size vs DMSO).

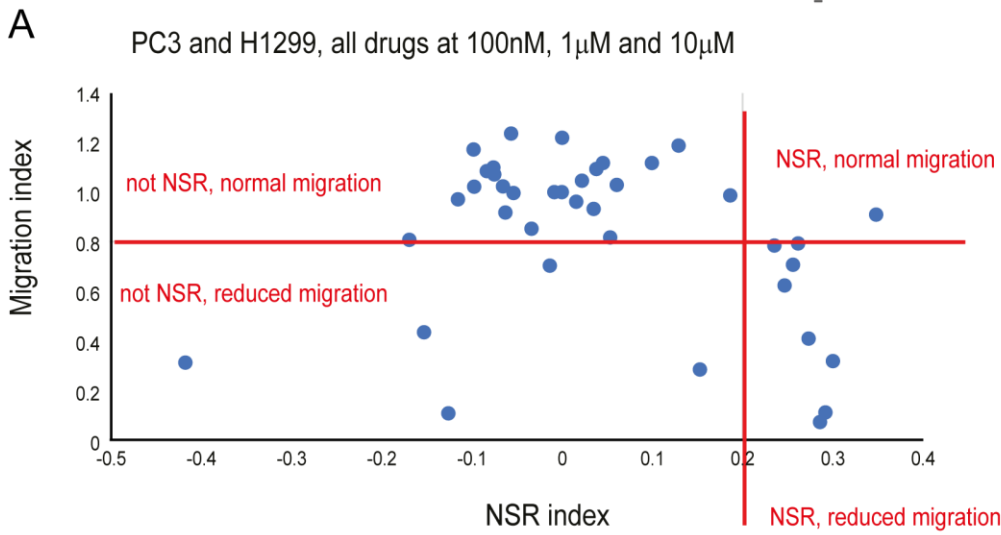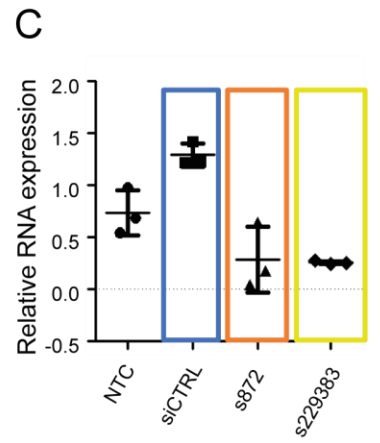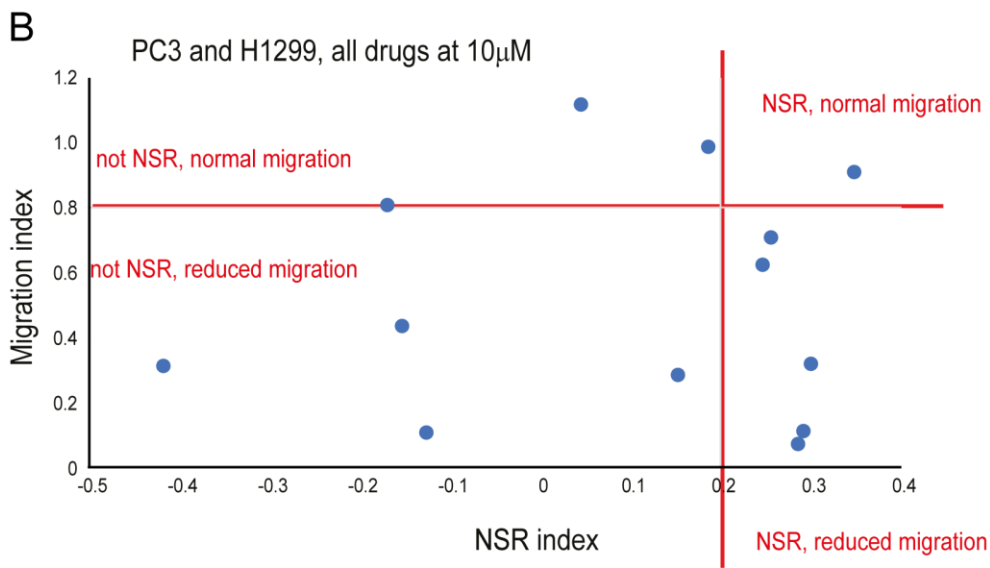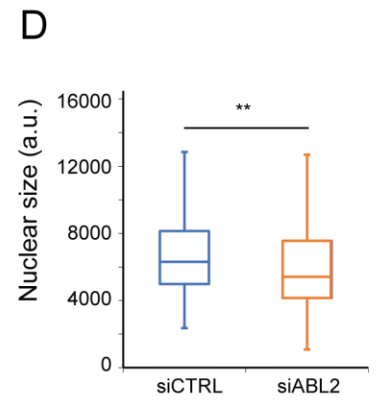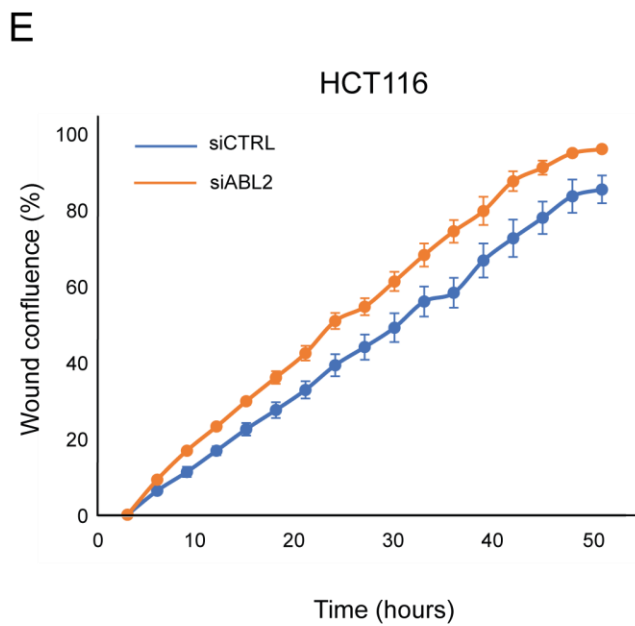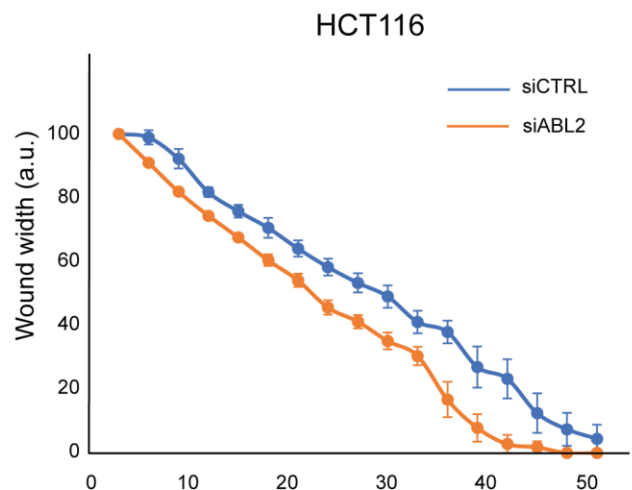

**Supplementary Figure S8. Nuclear size rectification is a good predictor of cell migration impairment.** **a** Scatter plot showing the migration index (vertical) as a function of the NSR index (horizontal, see Methods) across PC3 and H1299 cell lines and all compound treatments at concentrations larger or equal to 100nM. 1 dot = 1 condition (cell line/compound /concentration). The vertical red line distinguishes the strong NSR phenotypes (NSR index>0.2), and the horizontal red line the migration phenotypes (migration index < 0.8 = reduced migration). The number of dots within each region delimited by the red lines was used to estimate the probability that a compound that is NSR at a given concentration, reduces migration at this concentration (see Methods). **c** Quantification of ABL2 expression at the mRNA level in presence of the indicated siRNAs in PC3 cells. **d** Whisker and Box plots showing the distribution of absolute nuclear size in PC3 cells treated with control siRNA (blue, N=132) and siABL2 (orange, N=354) as indicated, as determined by fluorescence microscopy (see Methods). The distribution of nuclear sizes in cells treated with siCTRL and siABL2 were compared using a Wilcoxon Rank test (\*\*: p=0.0013). **e** Wound healing assay in presence of siRNA-mediated ABL2 knock-out. Left and right plots show respectively the wound confluence and wound width normalized to the width at the first time-point, as a function of time for HCT116 cells, treated with 20 nM siCTRL (blue) and 20 nM siABL2 (orange). Data points show confluence and width values averaged over 8 replicates, and error bars represent the standard error on the mean.

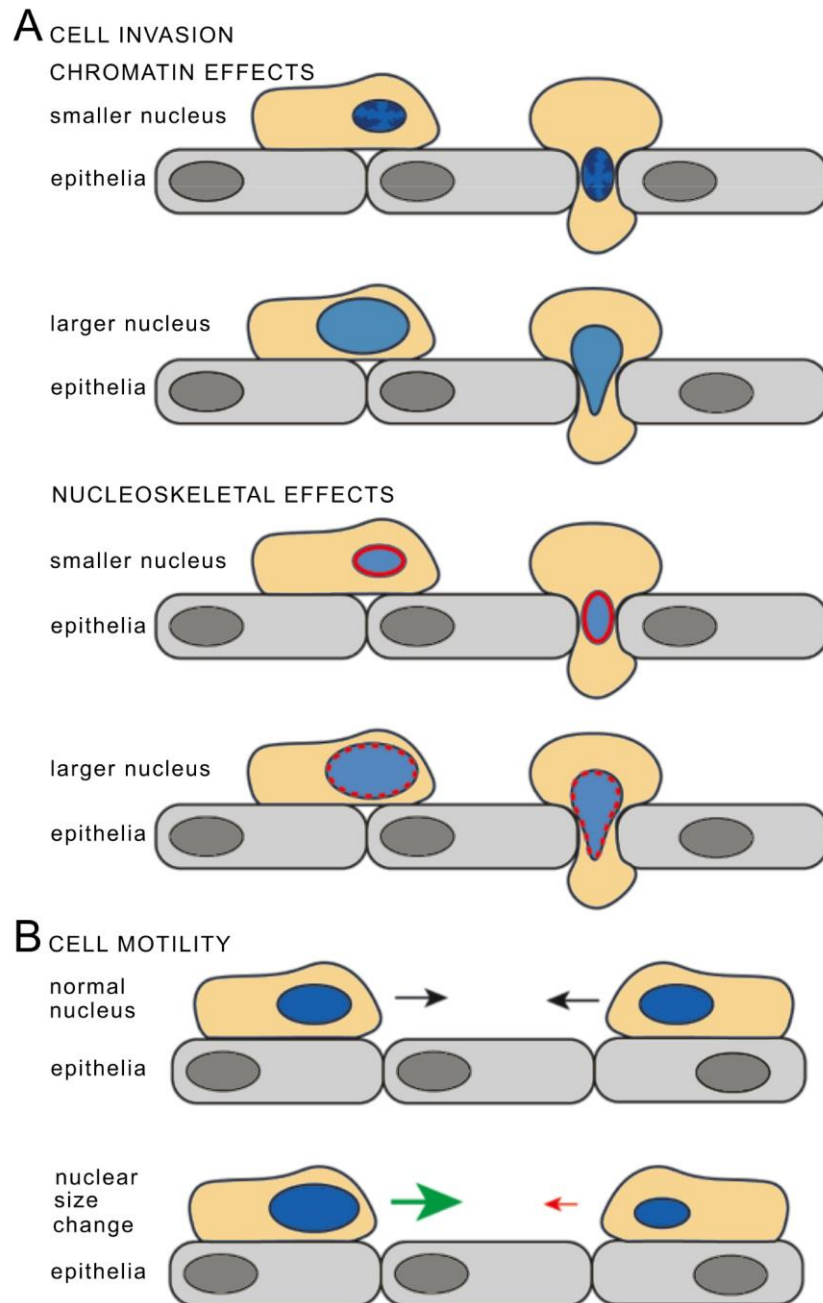

**Supplementary Figure S9.** Model for how nuclear size changes may affect cancer cell invasiveness. **a** Chromatin effects on nuclear size and stiffness (top). For cell invasion through an epithelial layer, condensation of chromatin in a smaller nucleus could allow facile transit through a tight junction while looser chromatin in a larger nucleus could make the nucleus more malleable and also facilitate transit through a tight junction. Nucleoskeletal effects on nuclear size and stiffness (bottom). Reduced lamin A production might result in a smaller nucleus that could squeeze through tight junctions. Conversely scaling defects that cause a larger nucleus with lower lamin density would be more malleable to facilitate tight junction transit. **b** Cell motility may also be affected by nuclear size. Altered connections between the nucleoskeleton and cytoplasmic filaments in cells with larger or smaller nuclear size may influence cell mobility.

## Supplementary Tables legends:

**Supplementary Table 1.** Summary table showing the fraction of hits replicated once, twice or three times, using the two metrics and two analysis strategies introduced in the main text, and that yielded a p-value lower than 0.05 upon a compound vs DMSO Wilcoxon rank-test.

**Supplementary Table 2.** Effects across cell lines and duration of treatment of compounds identified as affecting the average absolute nuclear size in at least one condition.

**Supplementary Table 3.** Effects across cell lines and duration of treatment of compounds identified as affecting the average N/C ratio in at least one condition.

**Supplementary Table 4.** Effects across cell lines and duration of treatment of compounds identified as affecting the fractions of outlier cells with abnormally large or small nucleus in at least one condition.

**Supplementary Table 5.** Effects across cell lines and duration of treatment of compounds identified as affecting the fractions of outlier cells with abnormally large or small N/C ratio in at least one condition

**Supplementary Table 6.** Targets of NSR compounds. Sheet 1 lists all NSR and NSW compound targets from all cell lines and any analysis method. Sheet 2 lists specific nuclear size increasers and decreasers. Sheet 3 lists unique rectifier compound targets. Sheet 4 lists All PC3 NSR and NSW compound targets while sheet 5 lists those for compounds identified using any of the 4 measures. Sheets 6 and 7 respectively list All and Any for the HCT116 cell line and sheets 8 and 9 for H1299s. Sheet 10 lists the ChEMBL target hit count. Sheet 11 lists the number of compounds in the screen that hit a particular target. Sheet 12 lists the known targets of each compound.

**Supplementary Table 7.** Compounds tested in detail with chemical structures.

**Supplementary Table 1 :**

| <b>Metric</b> | <b>Analysis strategy</b> | <b>% of 1-rep hits with p&lt;0.05</b> | <b>% of 2-rep hits with p&lt;0.05</b> | <b>% of 3-rep hits with p&lt;0.05</b> |
|---------------|--------------------------|---------------------------------------|---------------------------------------|---------------------------------------|
| Nuclear size  | Average                  | 80,6                                  | 66,7                                  | 100                                   |
| Nuclear size  | Outliers                 | 16,3                                  | 87,5                                  | 100                                   |
| N/C ratio     | Average                  | 40                                    | 93,3                                  | 100                                   |
| N/C ratio     | Outliers                 | 38,6                                  | 88,9                                  | 100                                   |



Supplementary Table 2

| Compound   | Chemical name                                 | Therapeutic group                      | Mechanism/class                          | Hit PC3 6h | Hit PC3 36h | Hit HCT116 6h | Hit HCT116 36h | Hit H1299 6h | Hit H1299 36h |
|------------|-----------------------------------------------|----------------------------------------|------------------------------------------|------------|-------------|---------------|----------------|--------------|---------------|
| Plate09A09 | Betonidine                                    | -                                      | -                                        |            |             | -             |                |              |               |
| Plate09F02 | Fillalbin                                     | -                                      | -                                        |            |             |               |                | -            |               |
| Plate07A02 | Serotonin hydrochloride                       | Neurotransmitter                       | 5HT agonist                              |            |             | -             |                |              |               |
| Plate09C09 | Skimmianine                                   | Sedative                               | 5HT ligand                               |            |             | -             |                |              |               |
| Plate07D02 | Fluoxetine hydrochloride                      | Antidepressant                         | 5HT uptake inhibitor                     |            | -           |               |                |              |               |
| Plate09F03 | Citalopram Hydrobromide                       | Antidepressant                         | 5HT uptake inhibitor                     | -          |             |               |                | -            |               |
| Plate11F02 | Paroxetine Hydrochloride                      | Antidepressant                         | 5HT uptake inhibitor                     |            | -           |               |                |              |               |
| Plate13F05 | Sertraline                                    | Antidepressant                         | 5HT uptake inhibitor                     |            | -           |               | -              |              |               |
| Plate06B03 | Anisomycin                                    | Antiprotozoal                          | Acetylcholine esterase inhibitor         |            | -           |               |                |              |               |
| Plate14E03 | (-)-Eseroline fumarate salt                   | Potent analgesic                       | Acetylcholine esterase inhibitor         |            | -           |               |                |              |               |
| Plate10E09 | Vidarabine                                    | Antiviral                              | Adenosine antimetabolite                 | +          | +           |               | -              |              | +             |
| Plate01D05 | Triamterene                                   | Diuretic                               | Aldosterone antagonist (non competitive) |            | +           |               |                |              |               |
| Plate09D09 | Ricinine                                      |                                        | Alkaloid                                 |            |             | -             |                |              |               |
| Plate08E05 | Piperlongumine                                | Antifungal                             | Alkaloid                                 |            | -           |               |                |              |               |
| Plate08E08 | Eburnamonine (-)                              | Cerebral vasodilator                   | Alkaloid                                 |            |             |               | -              |              | -             |
| Plate14E09 | (+,-)-Synephrine                              | Adrenergic                             | Alpha adrenergic agonist                 |            |             |               |                | +            |               |
| Plate03D08 | Metaraminol bitartrate                        | Vasoconstrictor                        | alpha Adrenergic agonist                 |            |             |               |                | +            |               |
| Plate13F08 | Etilefrine hydrochloride                      | Antihypertensive                       | Alpha Adrenergic agonist (alpha1)        |            |             |               |                | +            |               |
| Plate13H09 | Methyldopate hydrochloride                    | Antihypertensor                        | Alpha Adrenergic agonist (alpha2)        |            | -           |               |                |              |               |
| Plate10B10 | Levonordefrin                                 | Vasoconstrictor                        | Alpha Adrenergic agonist (alpha2)        |            |             |               |                | +            |               |
| Plate10D02 | Terazosin hydrochloride                       | Antihypertensor                        | Alpha adrenergic antagonist              |            | -           |               |                |              |               |
| Plate09F09 | Tetrahydrozoline hydrochloride                | Vasoconstrictor                        | Alpha adrenergic ligand                  |            |             | -             |                | -            |               |
| Plate08H03 | Dipivefrin hydrochloride                      | Adrenergic (ophthalmic)                | alpha beta Agrenergic agonist            |            |             |               | +              | +            |               |
| Plate10G08 | Merbromin                                     | Antibacterial                          | Antibacterial                            |            |             | +             |                |              |               |
| Plate12H06 | Florfenicol                                   | Antibacterial                          | Antibacterial                            |            |             |               |                | -            |               |
| Plate13A11 | Roxarsone                                     | Antibacterial                          | Antibacterial                            | -          |             |               |                |              |               |
| Plate09A03 | Epicatchin(-)                                 | Antidiarrhoeic                         | Antidiarrhoeic                           | -          |             |               |                |              |               |
| Plate14G11 | Parbendazole                                  | Anthelmintic (VET)                     | Anthelmintic                             |            |             |               | -              |              |               |
| Plate13H11 | Pyruvium pamoate                              | Anthelmintic (Nematodes, enterobiasis) | Anthelmintic                             | -          | -           |               |                |              |               |
| Plate10A02 | Althiazide                                    | Antihypertensor                        | Antihypertensor                          |            | -           |               |                |              |               |
| Plate13H02 | Halofantrine hydrochloride                    | Antimalarial                           | Antimalarial                             |            | -           |               |                |              |               |
| Plate07A04 | Azathymine, 6                                 | Anticancer                             | Antimetabolite                           |            |             | -             |                |              |               |
| Plate11G07 | Azacytidine-5                                 | Antineoplastic                         | Antimetabolite                           | -          |             |               | -              |              | -             |
| Plate06H11 | Puromycin dihydrochloride                     | Antiprotozoal                          | Antimetabolite                           |            | -           |               | -              |              | -             |
| Plate10E06 | Ethoxyquin                                    | Antifungal                             | Antioxydant                              |            | -           |               |                |              |               |
| Plate14A09 | Piperacetazine                                | Antipsychotic                          | Antipsychotic                            |            |             |               | -              |              |               |
| Plate14B05 | Levopropoxyphene napsylate                    | Antitussive                            | Antitussive                              |            |             |               | -              |              |               |
| Plate09G11 | Strophanthidin                                | Cardiotonic                            | ATPase inhibitor                         |            |             |               |                | +            | +             |
| Plate08G02 | Methoxy-6-harmalan                            | Psoriasis treatment                    | Benzodiazepine receptor ligand           |            |             |               |                | +            |               |
| Plate03D09 | Salbutamol                                    | Bronchodilatator                       | Beta adrenergic agonist                  |            |             | +             |                | +            |               |
| Plate04E03 | Fenoterol hydrobromide                        | Bronchodilatator                       | Beta adrenergic agonist                  | -          |             |               | +              | +            |               |
| Plate05C06 | Clenbuterol hydrochloride                     | Bronchodilatator                       | Beta adrenergic agonist                  |            |             |               |                | +            |               |
| Plate07C06 | Metaproterenol sulfate, orciprenaline sulfate | Bronchodilatator                       | Beta adrenergic agonist                  |            |             |               | +              |              |               |
| Plate10C10 | Isoetharine mesylate salt                     | Bronchodilator                         | Beta adrenergic agonist                  |            |             |               |                | +            |               |

|            |                                            |                          |                                            |   |   |   |   |   |   |   |
|------------|--------------------------------------------|--------------------------|--------------------------------------------|---|---|---|---|---|---|---|
| Plate14F08 | (-)-Isoproterenol hydrochloride            | Bronchodilator           | Beta adrenergic agonist                    |   |   |   |   |   | + |   |
| Plate05D03 | Dobutamine hydrochloride                   | Bronchodilator           | Beta adrenergic agonist (beta1)            |   |   |   |   |   | + |   |
| Plate05H02 | Terbutaline hemisulfate                    | Bronchodilator           | Beta adrenergic agonist (beta2)            |   |   | - |   |   | + |   |
| Plate12G06 | Salmeterol                                 | Bronchodilator           | Beta adrenergic agonist (beta2)            |   |   |   | + |   | + |   |
| Plate05C10 | Ritodrine hydrochloride                    | Tocolytic                | Beta adrenergic agonist (beta2)            |   |   |   |   |   | + |   |
| Plate12G10 | (+,-)-Octopamine hydrochloride             | Adrenergic               | Beta adrenergic agonist (beta3)            |   |   |   |   |   | + |   |
| Plate05G03 | Betaxolol hydrochloride                    | Antihypertensor          | Beta adrenergic antagonist                 |   |   |   |   |   | - |   |
| Plate14A04 | Penbutolol sulfate                         | Antihypertensor          | Beta adrenergic antagonist                 |   |   | - |   |   |   |   |
| Plate12H03 | Propranolol hydrochloride                  | Antianginal              | Beta adrenergic blocker                    |   |   |   |   |   | - |   |
| Plate07F07 | (S)-(-)-Atenolol                           | Antihypertensor          | beta adrenergic blocker                    |   |   |   |   |   | + |   |
| Plate14B08 | Oxprenolol hydrochloride                   | Antihypertensor          | Beta adrenergic blocker                    |   |   | + |   |   |   |   |
| Plate12H04 | (R)-(+)-Atenolol                           | Antihypertensor          | Beta adrenergic blocker (beta1)            |   |   |   |   |   | - |   |
| Plate03F04 | Fenspiride hydrochloride                   | Antiinflammatory         | Bradykinin antagonist                      |   |   |   |   |   | + |   |
| Plate12D02 | (+)-Isoproterenol (+)-bitartrate salt      | Bronchodilator           | Bronchodilator                             |   |   |   |   |   | + |   |
| Plate05E09 | Bepidil hydrochloride                      | Antianginal              | Ca2+ channel blocker                       |   |   | - |   |   |   |   |
| Plate09D03 | (d,l)-Tetrahydroberberine                  | Sedative                 | Ca2+ channel blocker                       | - |   |   |   |   |   |   |
| Plate04E07 | Perhexiline maleate                        | Vasodilatator            | Ca2+ channel blocker                       | - | - | - | - | - | - |   |
| Plate06H09 | Felodipine                                 | Antihypertensor          | Ca2+ channel blocker (L-Type)              |   |   | - |   |   |   |   |
| Plate07H11 | Prenylamine lactate                        | Vasodilatator            | Ca2+ channel stimulation                   |   |   | - |   | - |   |   |
| Plate13C07 | Proscillaridin A                           | Cardiotonic              | Cardiac glycoside                          |   |   |   |   |   | + | + |
| Plate05F03 | Debrisoquin sulfate                        | Antihypertensor          | Catecholamine depletor                     |   |   |   |   | + | + |   |
| Plate07G02 | Ciclopirox ethanolamine                    | Antifungal               | Cell membrane proteins synthesis inhibitor |   |   |   |   | + |   | + |
| Plate14H09 | Cefepime hydrochloride                     | Antibacterial            | Cell wall destruction agent                |   |   |   |   |   | + |   |
| Plate06G11 | Ceforanide                                 | Antibacterial            | Cell wall synthesis inhibitor              | - |   |   |   |   |   |   |
| Plate14D09 | Benzylpenicillin sodium                    | Antibacterial            | Cell wall synthesis inhibitor              |   |   |   |   |   | + |   |
| Plate10A06 | Deferoxamine mesylate                      |                          | chelating agent                            |   |   |   |   | + |   | + |
| Plate03E03 | Tiratricol, 3,3',5-triiodothyroacetic acid | Hypocholesterolemic drug | Cholesterol downregulation                 |   |   |   |   | + |   | + |
| Plate12H09 | Urosiol                                    | Anticholelithogenic      | Cholesterol regulation                     |   |   |   |   |   | - |   |
| Plate07B02 | Metixene hydrochloride                     | Antiparkinsonian         | cholinergic inhibition                     |   |   | - |   |   | - |   |
| Plate09G02 | Trihexyphenidyl-D,L Hydrochloride          | Antiparkinsonian         | cholinergic inhibition                     |   |   |   |   |   | - |   |
| Plate02C08 | Tomatine                                   | Antifungal               | Cholinergic inhibition                     | - | - | - | - |   |   |   |
| Plate10C02 | Nadide                                     | -                        | CoA nicotinamide adenine dinucleotide      |   |   | - |   |   |   |   |
| Plate07D07 | Lovastatin                                 | Antihypercholesterolemic | CoA reductase inhibitor (HMG CoA)          |   |   | - |   |   |   |   |
| Plate13A10 | 3-Acetamidocoumarin                        | Antiinflammatory         | coumarin                                   | - |   |   |   |   |   |   |
| Plate03E04 | Flufenamic acid                            | Analgesic                | cyclooxygenase inhibition                  |   |   |   |   |   | + |   |
| Plate03E06 | Tolfenamic acid                            | Antiinflammatory         | cyclooxygenase inhibition                  |   |   |   |   |   | - |   |
| Plate07C09 | Resveratrol                                | Antiinflammatory         | cyclooxygenase inhibition                  |   |   | - |   | - |   |   |
| Plate10A03 | Isopyrin hydrochloride                     | Antiinflammatory         | cyclooxygenase inhibition                  |   |   |   |   |   |   | + |
| Plate10B11 | Ebselen                                    | Antiinflammatory         | cyclooxygenase inhibition                  | - |   |   |   | - |   | - |
| Plate10H02 | (R) -Naproxen sodium salt                  | Antiinflammatory         | cyclooxygenase inhibition                  |   |   | - |   |   |   | + |
| Plate11B07 | Suprofen                                   | Antiinflammatory         | cyclooxygenase inhibition                  | - |   |   |   |   |   |   |
| Plate11D07 | Indoprofen                                 | Antiinflammatory         | cyclooxygenase inhibition                  | - |   |   |   |   |   |   |
| Plate11F07 | Tolmetin sodium salt dihydrate             | Antiinflammatory         | cyclooxygenase inhibition                  | - |   |   |   |   |   |   |

|            |                               |                                                                    |                                          |   |     |     |   |   |   |
|------------|-------------------------------|--------------------------------------------------------------------|------------------------------------------|---|-----|-----|---|---|---|
| Plate13E04 | Azapropazone                  | Anti-inflammatory                                                  | cyclooxygenase inhibition                |   | -   |     |   |   |   |
| Plate14A10 | Oxyphenbutazone               | Anti-inflammatory                                                  | cyclooxygenase inhibition                | - | -   | -   | - | - | - |
| Plate09G06 | Methyl benzethonium chloride  | Antibacterial                                                      | Detergent                                |   |     |     | - |   |   |
| Plate09G09 | Benzethonium chloride         | Antibacterial                                                      | Detergent                                |   |     | -   |   |   |   |
| Plate10F08 | Alexidine dihydrochloride     | Antibacterial                                                      | Detergent                                | - | -   | +/- | - | - | - |
| Plate10H03 | Propidium iodide              | Antibacterial                                                      | Detergent                                |   |     |     |   |   | + |
| Plate02G09 | Canrenoic acid potassium salt | Antihypercholesterolemic                                           | Detergent                                |   |     |     |   |   | - |
| Plate02G04 | Chlorhexidine                 | Bacteriostatic                                                     | Detergent                                |   |     |     |   |   | + |
| Plate12E06 | Thonzonium bromide            |                                                                    | Detergent                                |   | -   |     | - |   |   |
| Plate14F05 | Sulfadoxine                   | Antibacterial                                                      | dihydropteroate synthase inhibitor       |   |     |     | - |   |   |
| Plate07H06 | Nifuroxazide                  | Antibacterial                                                      | DNA damage (bacterial)                   |   |     |     |   |   | + |
| Plate01D11 | Nicosamide                    | Anthelmintic                                                       | DNA damage (Helminthic)                  |   | -   |     |   |   |   |
| Plate06D09 | Doxorubicin hydrochloride     | Antibacterial                                                      | DNA intercalating agent                  |   | +   |     | + |   | + |
| Plate08F05 | Ellipticine                   | Anticancer                                                         | DNA Intercalating agent                  | + | +   |     | + | + | + |
| Plate07A08 | Daunorubicin hydrochloride    | Antineoplastic                                                     | DNA intercalating agent                  |   | +/- |     |   |   |   |
| Plate14B07 | Trifluridine                  | Antiviral (ophthalmic)                                             | DNA replication inhibitor (viral)        | + | +   |     | + |   | + |
| Plate08G09 | Salsolinol hydrobromide       | -                                                                  | Dopamine analog                          |   |     |     |   | + |   |
| Plate06F02 | Alizapride HCl                | Antiemetic                                                         | Dopamine antagonist                      |   | +/- |     |   |   | + |
| Plate08E02 | Scoulerine                    | Antiemetic                                                         | Dopamine antagonist                      |   | +   |     | - |   |   |
| Plate09G05 | Bromopride                    | Antiemetic                                                         | Dopamine antagonist                      |   |     |     |   | - |   |
| Plate07C10 | Bromperidol                   | Antipsychotic                                                      | Dopamine antagonist                      |   |     |     | - |   |   |
| Plate09F04 | Promazine hydrochloride       | Antipsychotic                                                      | Dopamine antagonist                      |   |     |     |   | - |   |
| Plate04G09 | Pimozide                      | Antipsychotic                                                      | Dopamine antagonist ?                    | - |     |     | - |   |   |
| Plate02B08 | Disulfiram                    | Alcohol deterrent                                                  | Dopamine beta hydroxylase inhibitor      | - | -   |     |   |   | - |
| Plate05G07 | GBR 12909 dihydrochloride     | Antidepressant                                                     | Dopamine uptake inhibitor                | + |     |     | - |   |   |
| Plate03G07 | Griseofulvin                  | Antifungal                                                         | Enzymatic inductor                       |   |     |     | - |   |   |
| Plate11A11 | Sulconazole nitrate           | Antifungal                                                         | Ergosterol synthesis inhibition          | - |     |     |   |   |   |
| Plate11G11 | Luteolin                      | Expectorant                                                        | Flavonoid                                |   | +   |     | + |   |   |
| Plate10B09 | Folinic acid calcium salt     | Antianemic                                                         | Folic acid antagonist                    |   |     |     | - |   |   |
| Plate03E09 | Trimethoprim                  | Antibacterial                                                      | Folic acid antagonist                    |   |     |     |   | + |   |
| Plate01D08 | Pyrimethamine                 | Antiprotozoal                                                      | Folic acid antagonist                    |   | +   |     | + |   | + |
| Plate09G03 | Succinylsulfathiazole         | Antibacterial                                                      | Folic acid synthesis inhibition          | - |     |     |   | - |   |
| Plate09H02 | Sulfabenzamide                | Antibacterial                                                      | Folic acid synthesis inhibition          |   |     | +   |   |   |   |
| Plate10B02 | Sulfaquinoxaline sodium salt  | Antibacterial                                                      | Folic acid synthesis inhibition          |   | -   |     |   |   |   |
| Plate10A09 | Sulfadimethoxine              | Antibacterial                                                      | Folic acid synthesis inhibitor           |   |     |     | - |   |   |
| Plate08A10 | Dihydroergotoxine mesylate    | Anticonvulsant                                                     | GABA A receptor Cl-channel high affinity |   | -   |     |   |   |   |
| Plate07F10 | Thiocolchicoside              | Muscle relaxant                                                    | GABA agonist ?                           |   |     |     | + |   |   |
| Plate09C03 | Gelsemine                     | Tumour inhibitor                                                   | GABA antagonist                          | - |     |     |   |   |   |
| Plate09B03 | Picrotoxinin                  | Analeptic                                                          | GABA channel blocker                     | - |     |     |   |   |   |
| Plate13E03 | Alfaxalone                    | In combination with alfadolone acetate as anesthetic (intravenous) | GABA receptor stimulation                |   |     |     | - |   |   |
| Plate13E02 | Alfadolone acetate            | In combination with alfaxalone as anesthetic (intravenous)         | GABA receptor stimulation                |   |     |     | - |   |   |
| Plate07D09 | Budesonide                    | Antiinflammatory                                                   | Glucocorticoid                           | + |     |     | + |   |   |
| Plate04D10 | Methylprednisolone, 6-alpha   | Glucocorticoid                                                     | Glucocorticoid                           | - |     |     | + | + |   |
| Plate09A06 | Flurandrenolide               | Glucocorticoid                                                     | Glucocorticoid                           |   |     | +   |   |   |   |
| Plate09H09 | Fluorometholone               | Glucocorticoid                                                     | Glucocorticoid                           |   |     | -   |   |   |   |

|            |                                      |                          |                                               |   |   |   |   |   |   |
|------------|--------------------------------------|--------------------------|-----------------------------------------------|---|---|---|---|---|---|
| Plate10G02 | Clobetasol propionate                | Glucocorticoid           | Glucocorticoid                                |   | - |   |   |   |   |
| Plate14A05 | Prednicarbate                        | Glucocorticoid (topical) | Glucocorticoid                                |   |   |   | - |   |   |
| Plate08B03 | Mometasone furoate                   | Antiinflammatory         | glucocorticoid receptor agonist               |   |   |   | + |   |   |
| Plate10F02 | Alclometasone dipropionate           | Anti-inflammatory        | glucocorticoid receptor agonist               |   | - |   |   |   |   |
| Plate03F08 | Mebendazole                          | Parasite suppressor      | Glucose transport inhibitor ?                 |   | + |   |   |   |   |
| Plate02E07 | Mefloquine hydrochloride             | Antimalarial             | Heme polymerase inhibitor                     |   | - |   | - |   |   |
| Plate06H07 | Primaquine diphosphate               | Antimalarial             | Heme polymerase inhibitor                     |   | - |   | + |   | + |
| Plate10H08 | Methotrimeprazine maleat salt        | Analgesic                | Histamine antagonist                          |   |   | + |   |   |   |
| Plate10H04 | Cloperastine hydrochloride           | Antitussive              | Histamine antagonist                          |   |   |   |   |   | - |
| Plate07C11 | Cyclizine hydrochloride              | Antiemetic               | Histamine antagonist (H1)                     |   |   |   | - |   |   |
| Plate02F07 | Astemizole                           | Antihistaminic           | Histamine antagonist (H1)                     | - | - |   |   |   |   |
| Plate07C04 | Cetirizine dihydrochloride           | Antihistaminic           | Histamine antagonist (H1)                     |   |   |   | - |   |   |
| Plate13F04 | Deptropine citrate                   | Antihistaminic           | Histamine antagonist (H1)                     |   | - |   |   |   |   |
| Plate06C09 | Roxatidine Acetate HCl               | Antiulcerative           | Histamine antagonist (H2)                     |   | - |   |   |   |   |
| Plate14D05 | Cyproterone acetate                  | Antiandrogen             | hormone antiandrogen                          |   |   |   | - |   |   |
| Plate09E09 | Estropipate                          | Estrogen                 | Hormone estrogen                              |   |   | - |   |   |   |
| Plate10D07 | Diethylstilbestrol                   | Estrogen                 | Hormone estrogen                              |   | + |   | - |   |   |
| Plate11E07 | Ethinylestradiol 3-methyl ether      | Estrogen                 | Hormone estrogen                              | - |   |   |   |   |   |
| Plate05H08 | Clomiphene citrate (Z,E)             | Antineoplastic           | hormone Estrogen agonist                      |   | - |   |   |   |   |
| Plate02C06 | Danazol                              | Antigonadotropin         | hormone Estrogen antagonist                   |   | + |   | - |   |   |
| Plate12H07 | Megestrol acetate                    | Progestogen              | Hormone progestogen                           |   |   |   |   | - |   |
| Plate07H07 | Mycophenolic acid                    | Antineoplastic           | Inosine monophosphate dehydrogenase inhibitor |   | - |   |   |   | + |
| Plate02E03 | Metanephrine hydrochloride DL        |                          | Isoprenaline uptake inhibitor extraneuronal   |   |   | + |   | + |   |
| Plate07H05 | Tolazamide                           | Antidiabetic             | K+ channel blocker (ATP-dependent channels)   |   |   |   |   | + |   |
| Plate03C11 | Tolbutamide                          | Hypoglycemic             | K+ channel blocker (ATP-dependent channels)   | + |   |   | + |   | + |
| Plate08F03 | Harmol hydrochloride monohydrate     | Anxiolytic               | Liver conjugation probe                       |   |   |   |   | + |   |
| Plate11H07 | Arcaine sulfate                      |                          | Lowers blood sugar                            | - |   |   |   |   |   |
| Plate12A04 | Digoxigenin                          | Diagnosis                | Mainly used as a non-isotopic label for DNA   |   |   |   |   | + |   |
| Plate03A11 | Phenelzine sulfate                   | Antidepressant           | MAO inhibitor                                 | - |   |   |   |   |   |
| Plate10H06 | Isocarboxazid                        | Antidepressant           | MAO inhibitor                                 |   |   |   | - |   |   |
| Plate08F04 | Harmine hydrochloride                | Anthelmintic             | MAO inhibitor                                 |   | + |   |   |   |   |
| Plate04H09 | Quinacrine dihydrochloride dihydrate | Antimalarial             | MAO inhibitor                                 | - |   |   | - |   | + |
| Plate07G11 | Parthenolide                         | Antiinflammatory         | MAPK inhibitor                                |   | - |   |   |   | + |
| Plate06B05 | Apigenin                             | Antiproliferative        | MAPK inhibitor                                |   | + |   |   | + |   |
| Plate12D03 | Monobenzone                          | Depigmentor              | melanin inhibition                            |   |   |   | + |   | + |
| Plate09A07 | Helveticoside                        | Cardiotonic              | membrane ATP inhibitor                        |   |   |   |   | + |   |
| Plate10C09 | Monensin sodium salt                 | Antibacterial            | Membrane ionophores producer                  |   | - |   | - |   | - |
| Plate03E11 | Fenbendazole                         | Anthelmintic             | microtubule polymerisation inhibitor          |   | + |   |   |   | - |
| Plate05E04 | Colchicine                           | Antiinflammatory         | microtubule polymerisation inhibitor          |   |   |   | - |   | - |
| Plate02B11 | Nocodazole                           | Antineoplastic           | microtubule polymerisation inhibitor          |   | + |   | - |   |   |
| Plate02H06 | Paclitaxel                           | Antineoplastic           | microtubule polymerisation inhibitor          |   |   |   | - |   | - |

|            |                                     |                                 |                                            |   |   |   |   |   |   |
|------------|-------------------------------------|---------------------------------|--------------------------------------------|---|---|---|---|---|---|
| Plate04A08 | Albendazole                         |                                 | microtubule polymerisation inhibitor       | - | + |   | + |   | + |
| Plate10G03 | Podophyllotoxin                     | Antiviral                       | microtubule polymerisation inhibitor       |   |   |   | - |   |   |
| Plate12H08 | Deoxycorticosterone                 | Mineralocorticoid               | Mineralocorticoid                          |   |   |   |   | - |   |
| Plate03G03 | Antimycin A                         | Antifungal                      | Mitochondrial electron transport inhibitor |   |   |   | + |   | + |
| Plate14C05 | Mepylcaine hydrochloride            | Local anesthetic                | Momoamine transport inhibition             |   |   |   | - |   |   |
| Plate09D07 | Beta-Escin                          | Peripheral vascular disorders   | Momoamine transport inhibition             |   | - |   |   |   |   |
| Plate14B06 | Piperidolate hydrochloride          | Antispasmodic                   | Muscarinic blocking agent                  |   | + |   |   |   |   |
| Plate09H03 | Benzocaine                          | Anesthetic                      | Na+ channel blocker                        | - |   | + |   |   |   |
| Plate10E02 | Butamben                            | Anesthetic                      | Na+ channel blocker                        |   | - |   |   |   |   |
| Plate03D10 | Prilocaine hydrochloride            | Local anesthetic                | Na+ channel blocker                        |   | + |   |   |   | + |
| Plate10G09 | Hexylcaine hydrochloride            | Local anesthetic                | Na+ channel blocker                        |   |   |   | - |   |   |
| Plate09H07 | Pramoxine hydrochloride             | Local anesthetic                | Na+ channel inhibitor (voltage-dependent)  |   |   | + |   |   |   |
| Plate12H10 | Proparacaine hydrochloride          | Topical anesthetic (ophthalmic) | Na+ channel inhibitor (voltage-dependent)  |   |   |   |   | - |   |
| Plate01B04 | Hydroflumethiazide                  | Antihypertensor                 | Na+ Cl- transport inhibitor                |   |   |   |   | + |   |
| Plate03F11 | Indapamide                          | Antihypertensor                 | Na+ Cl- uptake inhibitor                   |   | + |   |   |   |   |
| Plate06D07 | Digitoxigenin                       | Cardiotonic                     | Na+ K+ ATPase inhibitor                    |   |   |   | - | + | + |
| Plate06D08 | Digoxin                             | Cardiotonic                     | Na+ K+ ATPase inhibitor                    |   |   |   | + | + | + |
| Plate06H02 | Strophantine octahydrate            | Cardiotonic                     | Na+ K+ ATPase inhibitor                    |   |   |   |   | + | + |
| Plate09B07 | Lanatoside C                        | Cardiotonic                     | Na+ K+ ATPase inhibitor                    |   |   |   |   | + | + |
| Plate03F03 | Pyrantel tartrate                   | Anthelmintic                    | Neuromuscular depolarizing agent           |   | + |   |   |   |   |
| Plate09E03 | beta- Belladonnine dichloroethylate | Muscle relaxant                 | Nicotinic receptor ligand                  | - |   |   |   |   |   |
| Plate11A07 | Trimipramine maleate salt           | Antidepressant                  | Noradrenaline uptake inhibitor             | - |   |   |   |   |   |
| Plate09G04 | Famprofazone                        | Analgesic                       | NSAI                                       |   |   |   |   | - |   |
| Plate14G05 | Clonixin Lysinate                   | Analgesic                       | NSAI                                       |   |   |   | - |   |   |
| Plate09B09 | Suxibuzone                          | Antiinflammatory                | NSAI                                       |   |   | - |   |   |   |
| Plate11C07 | Oxalamine citrate salt              | Antiinflammatory                | NSAI                                       | - |   |   |   |   |   |
| Plate09F10 | Hexestrol                           | Estrogen antineoplastic         | Nuclear receptor ligand                    |   |   |   |   | - |   |
| Plate10H09 | Dienestrol                          | Non-steroidal estrogen          | Nuclear receptor ligand                    |   | - |   | - |   | - |
| Plate13G06 | Letrozole                           | Antineoplastic                  | P450 inhibitor                             |   |   |   |   | + |   |
| Plate10F09 | Proadifen hydrochloride             | Local anesthetic                | P450 inhibitor (mono-oxygenases)           | - | - |   | - |   |   |
| Plate05G10 | Ketoconazole                        | Antifungal                      | P450 inhibitor (P450c17)                   |   |   |   | - | - |   |
| Plate08C08 | Cilostazol                          | Antithrombotic                  | Phosphodiesterase inhibitor                |   |   |   | - |   |   |
| Plate14H05 | Saquinavir mesylate                 | Antiviral (HIV)                 | Protease inhibitor                         |   |   |   | - |   |   |
| Plate02G07 | Tamoxifen citrate                   | Anticancer                      | Protein kinase C inhibitor                 |   |   |   |   |   | + |
| Plate08A11 | Emetine dihydrochloride             | Antiamoebic                     | Protein synthesis inhibitor                |   | - |   |   | + |   |
| Plate10G11 | Cycloheximide                       | Antibacterial                   | Protein synthesis inhibitor                |   | - |   |   |   |   |
| Plate09E07 | Lycorine hydrochloride              | Antitumoral                     | Protein translation inhibitor              |   | - |   | - |   | - |
| Plate13E09 | Gabexate mesilate                   | Severe acute pancreatitis       | Proteinase inhibitor                       |   |   |   | - |   |   |
| Plate05H05 | Kanamycin A sulfate                 | Antibacterial                   | Ribosomal protein synthesis inhibitor      |   |   | + |   |   |   |
| Plate10D09 | Ribostamycin sulfate salt           | Antibacterial                   | Ribosomal protein synthesis inhibitor      |   |   |   | - |   |   |
| Plate12H02 | Crotamiton                          | Scabicide                       | Scabicide                                  |   |   |   |   | - |   |
| Plate13F10 | Tribenoside                         | Sclerosing agent                | Sclerosing agent                           | - | - |   | - |   |   |
| Plate12A06 | Cantharidin                         | Rubefiant                       | Serine protease releaser                   | - | - |   | - | - |   |
| Plate05G08 | Carbetapentane citrate              | Antitussive                     | Sigma1 receptor ligand                     |   |   |   | - | - |   |
| Plate10G10 | Drofenine hydrochloride             | Spasmolytic                     | Spasmolytic                                |   |   |   | - |   |   |
| Plate02E08 | Isoconazole                         | Antibacterial                   | Sterol 14-demethylase inhibitor            |   | - |   |   |   |   |

|            |                                         |                                               |                                               |   |     |  |   |   |   |
|------------|-----------------------------------------|-----------------------------------------------|-----------------------------------------------|---|-----|--|---|---|---|
| Plate03D11 | Camptothecine (S,+)                     | Antitumor agent                               | Topoisomerase I inhibitor                     |   | +   |  | + |   | + |
| Plate14F09 | Kaempferol                              | Anti-inflammatory                             | Topoisomerase I inhibitor                     |   | +   |  |   |   |   |
| Plate05G06 | Mitoxantrone dihydrochloride            | Antineoplastic                                | topoisomerase II inhibitor                    | + |     |  |   |   | + |
| Plate05H07 | Etoposide                               | Antineoplastic                                | Topoisomerase II inhibitor                    | + | +   |  | + |   |   |
| Plate09F11 | Cefmetazole sodium salt                 | Antibacterial                                 | transpeptidase inhibitor (bacterial)          |   |     |  |   | - |   |
| Plate14G06 | Verteporfin                             | Treatment of age-related macular degeneration | Treatment of age-related macular degeneration |   |     |  |   | + |   |
| Plate11H10 | Capsaicin                               | Topical analgesic                             | Vanilloid receptor ligand                     |   | +   |  |   |   |   |
| Plate06C02 | Suloctidil                              | Vasodilatator                                 | Vasodilatator                                 |   | -   |  |   |   |   |
| Plate12B07 | N-Acetyl-L-leucine                      | Vertigo                                       | Vertigo                                       |   |     |  |   | + |   |
| Plate08H05 | Riboflavine                             | Vitamin                                       | Vitamin                                       |   |     |  |   | + |   |
| Plate06F10 | Menadione                               | Vitamin K3                                    | Vitamin precursor                             |   | +/- |  |   |   |   |
| Plate09F08 | 3-alpha-Hydroxy-5-beta-androstan-17-one |                                               |                                               |   |     |  |   | - |   |
| Plate14D11 | Methiazole                              |                                               |                                               |   |     |  | - |   |   |
| Plate14E05 | Leucomisine                             |                                               |                                               |   |     |  | - |   |   |

Supplementary Table 3

| Compound   | Chemical name                          | Therapeutic group               | Mechanism/class                   | Hit PC3 6h | Hit PC3 36h | Hit HCT116 6h | Hit HCT116 36h | Hit H1299 6h | Hit H1299 36h |
|------------|----------------------------------------|---------------------------------|-----------------------------------|------------|-------------|---------------|----------------|--------------|---------------|
| Plate08C11 | Yohimbic acid monohydrate              | -                               | -                                 | +          |             |               |                |              |               |
| Plate09A09 | Betonicine                             | -                               | -                                 |            |             | -             |                |              |               |
| Plate09F02 | Fillalbin                              | -                               | -                                 |            |             | +             | +              | +            |               |
| Plate07D11 | Sulfasalazine                          | Treatment of ulcerative colitis | 15-hydroxydehydrogenase inhibitor | -          |             |               |                |              |               |
| Plate09H08 | Finasteride                            | Antialopecia agent              | 5A-reductase inhibitor            |            |             | +             |                |              |               |
| Plate05F06 | Methiothepin maleate                   | -                               | 5HT antagonist                    |            | -           |               |                |              |               |
| Plate04F08 | Benzydamine hydrochloride              | Analgesic                       | 5HT antagonist                    |            | -           |               |                |              |               |
| Plate13D03 | Pizotifen malate                       | Antimigraine                    | 5HT antagonist                    |            |             |               | +              | +            |               |
| Plate02C04 | Cyproheptadine hydrochloride           | Antipruritic                    | 5HT antagonist                    |            | -           |               |                |              |               |
| Plate06C11 | Cisapride                              | Peristaltic stimulant           | 5HT antagonist                    | +          |             |               | -              |              |               |
| Plate08A03 | Dihydroergocristine mesylate           | Vasodilatator                   | 5HT antagonist                    |            | -           |               |                |              |               |
| Plate05E05 | Metergoline                            | Antiprolactin                   | 5HT antagonist (5HT1)             |            |             | -             |                |              |               |
| Plate07F02 | Pirenperone                            |                                 | 5HT antagonist (5HT2)             |            | -           |               |                |              |               |
| Plate14B09 | Ondansetron Hydrochloride              | Antiemetic                      | 5HT antagonist (5HT3)             | -          |             |               | +              |              |               |
| Plate09C09 | Skimianine                             | Sedative                        | 5HT ligand                        |            |             | -             |                |              |               |
| Plate01H03 | Imipramine hydrochloride               | Antidepressant                  | 5HT transport inhibitor           |            |             |               | -              |              | -             |
| Plate02B03 | Zimelidine dihydrochloride monohydrate | Antidepressant                  | 5HT uptake inhibitor              |            |             | +             |                |              |               |
| Plate07A09 | Dosulepin hydrochloride                | Antidepressant                  | 5HT uptake inhibitor              |            | -           |               |                |              | -             |
| Plate07D02 | Fluoxetine hydrochloride               | Antidepressant                  | 5HT uptake inhibitor              |            |             |               | -              |              |               |
| Plate09F03 | Citalopram Hydrobromide                | Antidepressant                  | 5HT uptake inhibitor              | -          |             |               |                | +            |               |
| Plate11F02 | Paroxetine Hydrochloride               | Antidepressant                  | 5HT uptake inhibitor              | +          |             |               |                |              |               |
| Plate13F05 | Sertraline                             | Antidepressant                  | 5HT uptake inhibitor              | +          | -           |               | +              | +            |               |
| Plate06B03 | Anisomycin                             | Antiprotozoal                   | Acetylcholine esterase inhibitor  |            |             | +             | +              |              | +             |
| Plate14E03 | (-)-Eseroline fumarate salt            | Potent analgesic                | Acetylcholine esterase inhibitor  |            |             |               |                |              | -             |
| Plate10E04 | Meclofenoxate hydrochloride            | Cerebral stimulant              | Acetylcholine precursor           |            |             |               |                | -            |               |
| Plate10E09 | Vidarabine                             | Antiviral                       | Adenosine antimetabolite          | -          | -           |               | +              |              |               |
| Plate11H05 | Theobromine                            | Bronchodilator                  | Adenosine receptor antagonist     |            | -           |               |                |              |               |
| Plate03H07 | Dilazep dihydrochloride                | Vasodilatator                   | Adenosine uptake inhibitor        |            |             |               | -              |              |               |
| Plate11B04 | Bucladesine sodium salt                | Cardiotonic                     | Adenylate cyclase modulator       |            | -           |               | +              |              |               |
| Plate01E08 | Ticlopidine hydrochloride              | Platelet antiaggregant          | ADP antagonist                    |            | +           |               |                |              | -             |
| Plate04C04 | Doxepin hydrochloride                  | Anticonvulsant                  | Adrenaline uptake inhibitor       |            | -           |               |                |              |               |
| Plate09C11 | Tetrandrine                            | Analgesic                       | Alkaloid                          | +          | -           |               | -              | -            |               |
| Plate09D09 | Ricinine                               |                                 | Alkaloid                          |            |             | -             |                |              |               |
| Plate08E05 | Piperlongumine                         | Antifungal                      | Alkaloid                          | +          | +/-         | +             |                |              | +             |
| Plate08E07 | (-)-Cinchonidine                       | Antimalarial                    | Alkaloid                          | +          |             |               |                |              |               |
| Plate08E08 | Eburnamonine (-)                       | Cerebral vasodilatator          | Alkaloid                          |            |             |               | +              |              |               |
| Plate08F02 | Harmalol hydrochloride dihydrate       | Vasorelaxant                    | Alkaloid                          |            |             | -             |                |              |               |
| Plate03D02 | Midodrine hydrochloride                | Hypotensor                      | Alpha adrenergic                  |            | -           |               |                |              |               |
| Plate14E09 | (+,-)-Synephrine                       | Adrenergic                      | Alpha adrenergic agonist          | -          | -           | -             |                | +            |               |
| Plate03F05 | Gemfibrozil                            | Antihyperlipoproteinemic        | Alpha adrenergic agonist          |            | -           |               |                |              |               |
| Plate07F06 | Methoxamine hydrochloride              | Antihypotensive                 | alpha Adrenergic agonist          | -          |             |               |                | -            |               |
| Plate05A05 | Phenylpropanolamine hydrochloride      | Decongestant                    | alpha Adrenergic agonist          |            | -           |               |                |              |               |
| Plate03D08 | Metaraminol bitartrate                 | Vasoconstrictor                 | alpha Adrenergic agonist          |            | -           | -             |                |              |               |

|            |                                |                                        |                                              |     |     |   |   |   |
|------------|--------------------------------|----------------------------------------|----------------------------------------------|-----|-----|---|---|---|
| Plate13F08 | Etilefrine hydrochloride       | Antihypotensive                        | Alpha Adrenergic agonist (alpha1)            |     |     | - |   |   |
| Plate13H09 | Methyldopate hydrochloride     | Antihypertensor                        | Alpha Adrenergic agonist (alpha2)            | +   |     |   | + |   |
| Plate10B10 | Levonordefrin                  | Vasoconstrictor                        | Alpha Adrenergic agonist (alpha2)            |     |     | - |   |   |
| Plate01E03 | Moxisylyte hydrochloride       | Vasodilatator                          | Alpha adrenergic antagonist                  |     |     |   | - |   |
| Plate01F11 | Tolazoline hydrochloride       | Vasodilatator                          | Alpha adrenergic antagonist                  |     | +/- |   |   |   |
| Plate02G02 | Verapamyl hydrochloride        | Antihypertensive                       | Alpha adrenergic antagonist (alpha1)         |     |     | + |   |   |
| Plate01H05 | Amityptiline hydrochloride     | Antidiabetic                           | Alpha Adrenergic antagonist (alpha1)         |     |     | + | - | - |
| Plate05A03 | Alfuzosin hydrochloride        | Antihypertensor                        | Alpha Adrenergic antagonist (alpha1)         |     | -   |   |   |   |
| Plate08B08 | Rauwolscine hydrochloride      | Antidepressant                         | Alpha adrenergic antagonist (alpha2)         |     |     |   | + |   |
| Plate09F09 | Tetrahydrozoline hydrochloride | Vasoconstrictor                        | Alpha adrenergic ligand                      |     |     | - |   |   |
| Plate08H03 | Dipivefrin hydrochloride       | Adrenergic (ophthalmic)                | alpha beta Agrenergic agonist                | +   |     | - |   |   |
| Plate10D03 | Phenazopyridine hydrochloride  | Analgesic                              | Analgesic                                    |     |     | - |   |   |
| Plate11B02 | Bergenin monohydrate           | Antiarrhythmic                         | Antiarrhythmic                               |     |     | - |   |   |
| Plate11B03 | Cromolyn disodium salt         | Antiasthmatic                          | Antiasthmatic                                |     |     | - |   | - |
| Plate07E03 | Thiostrepton                   | Antibacterial                          | Antibacterial                                |     |     | - |   |   |
| Plate12H06 | Florfenicol                    | Antibacterial                          | Antibacterial                                |     |     | + |   | + |
| Plate13D11 | Lymecycline                    | Antibiotic                             | Antibacterial                                |     |     |   | + | + |
| Plate13A11 | Roxarsone                      | Antibacterial                          | Antibacterial                                |     | -   |   | + | + |
| Plate08D10 | Seneciophylline                | Antitumor activity                     | Anticancer                                   |     | +   |   |   |   |
| Plate10H07 | Lithocholic acid               | Cholagogue                             | Anticholelithogenic                          |     |     |   |   | + |
| Plate09A03 | Epicatechin(-)                 | Antidiarrhoeic                         | Antidiarrhoeic                               | +/- |     | + |   |   |
| Plate13A04 | Enilconazole                   | Antifungal                             | Antifungal                                   |     | -   |   | + |   |
| Plate14G11 | Parbendazole                   | Anthelmintic (VET)                     | Anthelmintic                                 | +   | -   |   | + | + |
| Plate13H11 | Pyrvinium pamoate              | Anthelmintic (Nematodes, enterobiasis) | Anthelmintic                                 | +/- |     |   |   | + |
| Plate14D07 | Ciprofibrate                   | Antihyperlipoproteine-mic              | Antihyperlipoproteine-mic                    |     |     | + |   |   |
| Plate01H02 | Todralazine hydrochloride      | Antihypertensor                        | Antihypertensor                              | +   |     |   |   |   |
| Plate10A02 | Althiazide                     | Antihypertensor                        | Antihypertensor                              |     |     | - | + |   |
| Plate13H02 | Halofantrine hydrochloride     | Antimalarial                           | Antimalarial                                 | +   |     | + |   |   |
| Plate05C08 | Thioguanosine                  | Anticancer                             | Antimetabolite                               |     |     |   |   | + |
| Plate11G07 | Azacytidine-5                  | Antineoplastic                         | Antimetabolite                               | +/- | -   |   | + | + |
| Plate06H11 | Puromycin dihydrochloride      | Antiprotozoal                          | Antimetabolite                               |     | +/- |   | - |   |
| Plate02B05 | Azathioprine                   | Immunosuppressant                      | Antimetabolite                               |     |     |   |   | - |
| Plate07A11 | Iobenguane sulfate             | Antineoplastic if radiolabeled         | Antineoplastic                               |     |     |   | + |   |
| Plate10E06 | Ethoxyquin                     | Antifungal                             | Antioxydant                                  |     |     | - |   | - |
| Plate06A05 | Tocopherol (R,S)               | Anti-oxidant                           | Antioxydant                                  |     |     | - |   |   |
| Plate06B04 | Carbarsone                     | Antiamebic                             | Antiprotozoal                                |     |     |   |   | + |
| Plate12C07 | Fluspirilen                    | Antipsychotic                          | Antipsychotic                                |     | -   |   |   |   |
| Plate14A09 | Piperacetazine                 | Antipsychotic                          | Antipsychotic                                |     | -   |   |   |   |
| Plate14B05 | Levopropoxyphene napsylate     | Antitussive                            | Antitussive                                  |     |     |   | + |   |
| Plate07D04 | Norcyclobenzaprine             | Antilucerative                         | Antilucerative                               |     |     | + | - |   |
| Plate06H10 | Methoxy-8-psoralen             | Psoriasis treatment                    | Apoptosis inducer with UV                    |     |     |   |   | + |
| Plate09G11 | Strophanthidin                 | Cardiotonic                            | ATPase inhibitor                             |     |     |   | + | + |
| Plate07B08 | Vancomycin hydrochloride       | Antibacterial                          | Bacterial mucopeptide biosynthesis inhibitor |     | +   |   |   |   |
| Plate08G02 | Methoxy-6-harmalan             | Psoriasis treatment                    | Benzodiazepine receptor ligand               |     |     | - |   |   |
| Plate03D09 | Salbutamol                     | Bronchodilatator                       | Beta adrenergic agonist                      |     |     | - |   |   |
| Plate04E03 | Fenoterol hydrobromide         | Bronchodilatator                       | Beta adrenergic agonist                      |     |     | - |   | - |
| Plate05C06 | Clenbuterol hydrochloride      | Bronchodilatator                       | Beta adrenergic agonist                      |     |     | - |   |   |



|            |                                               |                   |                                                  |  |   |   |     |   |     |
|------------|-----------------------------------------------|-------------------|--------------------------------------------------|--|---|---|-----|---|-----|
| Plate07C06 | Metaproterenol sulfate, orciprenaline sulfate | Bronchodilatator  | Beta adrenergic agonist                          |  |   | - |     | - |     |
| Plate10C10 | Isoetharine mesylate salt                     | Bronchodilatator  | Beta adrenergic agonist                          |  |   | - |     |   |     |
| Plate14F08 | (-)-Isoproterenol hydrochloride               | Bronchodilatator  | Beta adrenergic agonist                          |  | - | - |     |   | +   |
| Plate01G09 | Isosuprine hydrochloride                      | Vasodilatator     | Beta adrenergic agonist                          |  | + | - |     |   |     |
| Plate05D03 | Dobutamine hydrochloride                      | Bronchodilatator  | Beta adrenergic agonist (beta1)                  |  |   | - |     |   |     |
| Plate05H02 | Terbutaline hemisulfate                       | Bronchodilatator  | Beta adrenergic agonist (beta2)                  |  | - |   |     |   |     |
| Plate12G06 | Salmeterol                                    | Bronchodilatator  | Beta adrenergic agonist (beta2)                  |  |   | - | +/- |   |     |
| Plate05C10 | Ritodrine hydrochloride                       | Tocolytic         | Beta adrenergic agonist (beta2)                  |  |   | - |     |   |     |
| Plate12G10 | (+,-)-Octopamine hydrochloride                | Adrenergic        | Beta adrenergic agonist (beta3)                  |  |   | - |     |   |     |
| Plate02A11 | Pindolol                                      | Antiarrhythmic    | Beta adrenergic antagonist                       |  | + |   |     | - |     |
| Plate07B10 | Propafenone hydrochloride                     | Antiarrhythmic    | Beta adrenergic antagonist                       |  | - |   |     | - |     |
| Plate10B04 | Metoprolol-(+,-) (+)-tartrate salt            | Antihypertensor   | Beta adrenergic antagonist                       |  |   |   |     | - |     |
| Plate14A04 | Penbutolol sulfate                            | Antihypertensor   | Beta adrenergic antagonist                       |  |   | - |     |   |     |
| Plate01G10 | Acebutolol hydrochloride                      | Antianginal       | Beta adrenergic antagonist (beta1)               |  |   | - |     |   |     |
| Plate04A11 | Alprenolol hydrochloride                      | Antihypertensor   | Beta adrenergic antagonist (beta1)               |  |   | - |     |   |     |
| Plate04D08 | Labetalol hydrochloride                       | Antihypertensor   | Beta adrenergic antagonist (beta1)               |  |   | - |     | - |     |
| Plate03A10 | Hydralazine hydrochloride                     | Antihypertensor   | Beta adrenergic antagonist (could be, not shown) |  |   |   |     |   | +   |
| Plate12H03 | Propranolol hydrochloride                     | Antianginal       | Beta adrenergic blocker                          |  | - |   |     | + |     |
| Plate07F07 | (S)-(-)-Atenolol                              | Antihypertensor   | beta adrenergic blocker                          |  | + |   |     |   |     |
| Plate14B08 | Oxprenolol hydrochloride                      | Antihypertensor   | Beta adrenergic blocker                          |  | - | - |     |   |     |
| Plate14D06 | (R)-Propranolol hydrochloride                 | Antihypertensor   | Beta adrenergic blocker                          |  |   |   | +   |   |     |
| Plate12H04 | (R)-(+)-Atenolol                              | Antihypertensor   | Beta adrenergic blocker (beta1)                  |  |   |   |     | + |     |
| Plate05C04 | Desipramine hydrochloride                     | Antidepressant    | Beta Adrenergic transport inhibitor              |  |   |   |     | - |     |
| Plate07G10 | Trimetazidine dihydrochloride                 | Antianoxic        | Beta-oxidation inhibition                        |  | + |   |     |   |     |
| Plate13A02 | Denatonium benzoate                           |                   | Bittering agent to prevent poisoning             |  |   |   |     |   | +   |
| Plate03F04 | Fenspiride hydrochloride                      | Antiinflammatory  | Bradykinin antagonist                            |  |   | - |     |   |     |
| Plate12D02 | (+)-Isoproterenol (+) bitartrate salt         | Bronchodilatator  | Bronchodilatator                                 |  |   | - |     | + |     |
| Plate02G05 | Loperamide hydrochloride                      | Antidiarrhoeic    | Ca2+ channel antagonist                          |  |   |   |     | - |     |
| Plate01H09 | Thioridazine hydrochloride                    | Neuroleptic       | Ca2+ channel antagonist                          |  |   |   |     | - |     |
| Plate05D07 | Adenosine 5'-monophosphate monohydrate        | Nutrient          | Ca2+ channel blocker                             |  |   |   |     | - |     |
| Plate09D03 | (d,l)-Tetrahydroberberin                      | Sedative          | Ca2+ channel blocker                             |  | - |   |     |   |     |
| Plate04E07 | Perhexiline maleate                           | Vasodilatator     | Ca2+ channel blocker                             |  | - | - | +/- | - | +/- |
| Plate08D06 | Calycanthine                                  |                   | Ca2+ channel blocker                             |  |   |   |     |   | -   |
| Plate03A06 | Ethosuximide                                  | Anticonvulsant    | Ca2+ channel inhibitor voltage dependant         |  |   |   |     |   | +   |
| Plate07D06 | Trimethadione                                 | Anticonvulsant    | Ca2+ channel inhibitor voltage dependant ?       |  |   |   |     | - |     |
| Plate07H11 | Prenylamine lactate                           | Vasodilatator     | Ca2+ channel stimulation                         |  | - |   |     |   | +   |
| Plate01G04 | Nifedipine                                    | Antihypertensor   | Ca2+ channels blocker (L type)                   |  |   | + |     |   |     |
| Plate11G04 | Etidronic acid, disodium salt                 | Calcium regulator | Calcium regulator                                |  |   |   |     | - |     |
| Plate01A05 | Metformin hydrochloride                       | Antidiabetic      | cAMP/PKA                                         |  | + |   |     |   |     |
| Plate05E06 | Brinzolamide                                  | Antiglaucoma drug | Carbonic anhydrase inhibitor                     |  | - |   |     |   |     |
| Plate14H07 | Dorzolamide hydrochloride                     | Antiglaucoma drug | Carbonic anhydrase inhibitor                     |  | - |   |     |   |     |

|            |                                |                          |                                                                                                 |   |   |   |     |   |   |
|------------|--------------------------------|--------------------------|-------------------------------------------------------------------------------------------------|---|---|---|-----|---|---|
| Plate01A04 | Acetazolamide                  | Diuretic                 | Carbonic anhydrase inhibitor                                                                    | + |   | + |     |   | + |
| Plate11A03 | Methazolamide                  | Diuretic                 | Carbonic anhydrase inhibitor                                                                    | - |   |   |     |   |   |
| Plate13C07 | Proscillaridin A               | Cardiotonic              | Cardiac glycoside                                                                               |   |   |   | +   |   | + |
| Plate14E08 | 2-Chloropyrazine               | Cardiotonic              | Cardiotonic                                                                                     |   |   | - | +   |   |   |
| Plate08A05 | Syrosingopine                  | -                        | Catecholamine depletor                                                                          | - |   |   |     |   |   |
| Plate05F03 | Debrisoquin sulfate            | Antihypertensor          | Catecholamine depletor                                                                          |   |   | - |     |   |   |
| Plate11H06 | Reserpine                      | Neuroleptic              | Catecholamine pump inhibitor                                                                    | + | - |   |     |   |   |
| Plate07G02 | Ciclopirox ethanolamine        | Antifungal               | Cell membrane proteins synthesis inhibitor                                                      |   |   |   |     |   | + |
| Plate07A10 | Ceftazidime pentahydrate       | Antibacterial            | Cell wall destruction agent                                                                     |   |   |   | +   |   |   |
| Plate07E07 | Ethionamide                    | Antibacterial            | Cell wall destruction agent                                                                     |   | + |   |     |   |   |
| Plate13E10 | Pivampicillin                  | Antibacterial            | Cell wall destruction agent                                                                     |   |   |   | +   | + |   |
| Plate13F02 | Flucloxacillin sodium          | Antibacterial            | Cell wall destruction agent                                                                     |   |   |   | +   |   |   |
| Plate13G09 | Benzathine benzylpenicillin    | Antibacterial            | Cell wall destruction agent                                                                     |   |   |   |     | + |   |
| Plate14H09 | Cefepime hydrochloride         | Antibacterial            | Cell wall destruction agent                                                                     |   |   | - |     |   |   |
| Plate06G11 | Ceforanide                     | Antibacterial            | Cell wall synthesis inhibitor (bacterial)                                                       | + | - |   |     |   |   |
| Plate06H04 | Cefotetan                      | Antibacterial            | Cell wall synthesis inhibitor (bacterial)                                                       |   | - |   | -   |   | + |
| Plate14E07 | D-cycloserine                  | Antibacterial            | Cell wall synthesis inhibitor (bacterial)                                                       |   | - | - |     |   |   |
| Plate14E10 | (S)-(-)-Cycloserine            | Antibacterial            | Cell wall synthesis inhibitor (bacterial)                                                       |   |   | - |     |   |   |
| Plate14G07 | Meropenem                      | Antibacterial            | Cell wall synthesis inhibitor (bacterial)                                                       |   |   |   | +   |   |   |
| Plate07C05 | Etifenin                       | Diagnostic agent         | Chelating agent                                                                                 |   |   |   | -   |   |   |
| Plate12G02 | Pentetic acid                  |                          | Chelating agent (iron)                                                                          |   |   |   |     | + |   |
| Plate12A07 | Clioquinol                     | Anti-infective           | Chelating agent, chymotrypsin-like proteasome activity inhibitor                                |   | - |   |     |   | + |
| Plate02E04 | Dehydrocholic acid             | Choleretic               | Choleretic                                                                                      |   | - |   |     |   |   |
| Plate05G05 | Probucol                       | Antihyperlipoproteinemic | Cholesterol downregulation                                                                      |   |   |   | +   |   |   |
| Plate06A03 | Arecoline hydrobromide         | Anthelmintic             | Cholinergic                                                                                     | + | - | + |     |   |   |
| Plate06E10 | Pilocarpine nitrate            | Antiglaucoma drug        | Cholinergic                                                                                     |   | + |   |     | + |   |
| Plate03H04 | Hyoscyamine (L)                | Antispasmodic            | Cholinergic                                                                                     | + |   |   |     |   |   |
| Plate09A08 | Myosmine                       | Cholinergic              | Cholinergic                                                                                     |   |   | + |     |   |   |
| Plate02A04 | Edrophonium chloride           | Myasthenia Gravis test   | Cholinergic                                                                                     |   |   |   |     |   | + |
| Plate01F03 | Carbamazepine                  | Anticonvulsivant         | Cholinergic antagonist                                                                          |   | - |   |     |   |   |
| Plate09E11 | Napelline                      | Antiarrhythmic           | cholinergic inhibition                                                                          | + |   |   |     |   |   |
| Plate04F05 | Pimethixene maleate            | Antihistaminic           | cholinergic inhibition                                                                          |   |   |   | -   |   |   |
| Plate07B02 | Metixene hydrochloride         | Antiparkinsonian         | cholinergic inhibition                                                                          |   |   | + |     | + |   |
| Plate10H10 | Pridinol methanesulfonate salt | Antiparkinsonian         | cholinergic inhibition                                                                          |   |   |   | +/- |   |   |
| Plate01E09 | Dicyclomine hydrochloride      | Antispasmodic            | cholinergic inhibition                                                                          |   | + |   |     |   |   |
| Plate14A03 | Tridihexethyl chloride         | Antispasmodic            | cholinergic inhibition                                                                          |   |   |   | +   |   |   |
| Plate04E08 | Oxybutynin chloride            | Spasmolytic              | cholinergic inhibition                                                                          |   |   |   |     | - |   |
| Plate10H05 | Eucatropine hydrochloride      |                          | cholinergic inhibition                                                                          |   |   | + | +   | - | + |
| Plate02A03 | Cotinine (-)                   | Antidepressant           | cholinergic inhibition (and nicotinic inhibition)                                               |   |   |   |     |   | + |
| Plate05H04 | Hemicholinium bromide          | Anticholinergic          | Cholinergic inhibition (partial, Acetylcholine stores depletor)                                 |   | + |   |     |   |   |
| Plate02C08 | Tomatine                       | Antifungal               | Cholinergic inhibition (pH-dependent competitive inhibition of the enzyme acetylcholinesterase) | - | - | - | -   |   |   |
| Plate01F02 | Trichlorfon                    | Anthelmintic             | cholinergic inhibition Cholinesterase inhibitor                                                 | + | - |   |     | - |   |

|            |                                           |                       |                                       |   |  |   |   |    |   |
|------------|-------------------------------------------|-----------------------|---------------------------------------|---|--|---|---|----|---|
| Plate05A10 | Tacrine hydrochloride hydrate             | Cognition enhancer    | Cholinesterase inhibitor              |   |  |   | - |    |   |
| Plate12A03 | Bemegride                                 | CNS stimulant         | CNS stimulant                         | + |  |   |   |    |   |
| Plate10C02 | Nadide                                    | -                     | CoA nicotinamide adenine dinucleotide |   |  |   |   | -  |   |
| Plate11G06 | Simvastatin                               | Anthyperlipidemic     | CoA reductase inhibitor (HMG CoA)     |   |  |   |   | -  |   |
| Plate01C03 | Panthenol (D)                             | Vitamin               | CoA synthesis precursor               |   |  |   |   | -  |   |
| Plate06H03 | Pantothenic acid calcium salt monohydrate | Nutritional factor    | CoA synthesis role                    |   |  | - |   |    |   |
| Plate04H05 | Enalapril maleate                         | Antihypertensor       | Converting enzyme inhibitor           |   |  |   | + |    |   |
| Plate14G08 | Ramipril                                  | Antihypertensor       | Converting enzyme inhibitor           |   |  | + |   |    |   |
| Plate13A10 | 3-Acetamidocoumarin                       | Antiinflammatory      | coumarin                              | - |  |   |   | +  |   |
| Plate13A03 | Scopoletin                                | Antispasmodic         | Coumarin                              |   |  |   |   | +  |   |
| Plate12B02 | 3-Acetylcoumarin                          |                       | coumarin                              |   |  |   |   | +  |   |
| Plate08A02 | Tubocurarine chloride pentahydrate (+)    | Muscle relaxant       | Curarising                            | + |  |   |   |    |   |
| Plate01C10 | Antipyrine                                | Analgesic             | cyclooxygenase inhibition             |   |  | + |   |    |   |
| Plate03E04 | Flufenamic acid                           | Analgesic             | cyclooxygenase inhibition             |   |  |   | - |    |   |
| Plate09H04 | Dipyrone                                  | Analgesic             | cyclooxygenase inhibition             |   |  |   | + |    | - |
| Plate11B06 | Fosfosal                                  | Analgesic             | cyclooxygenase inhibition             |   |  | - |   |    |   |
| Plate01E06 | Naproxen                                  | Antiinflammatory      | cyclooxygenase inhibition             |   |  | + |   |    |   |
| Plate01F05 | Mefenamic acid                            | Antiinflammatory      | cyclooxygenase inhibition             |   |  | - |   |    |   |
| Plate01H04 | Sulindac                                  | Antiinflammatory      | cyclooxygenase inhibition             | + |  |   |   |    |   |
| Plate02B09 | Acetylsalicylsalicylic acid               | Antiinflammatory      | cyclooxygenase inhibition             |   |  |   |   |    | - |
| Plate03E06 | Tolfenamic acid                           | Antiinflammatory      | cyclooxygenase inhibition             |   |  |   |   |    | + |
| Plate03E07 | Meclofenamic acid sodium salt monohydrate | Antiinflammatory      | cyclooxygenase inhibition             | - |  |   |   |    |   |
| Plate03F09 | Fenbufen                                  | Antiinflammatory      | cyclooxygenase inhibition             |   |  | - |   |    |   |
| Plate03F10 | Ketoprofen                                | Antiinflammatory      | cyclooxygenase inhibition             |   |  | - |   |    |   |
| Plate07C09 | Resveratrol                               | Antiinflammatory      | cyclooxygenase inhibition             | + |  | - |   | +/ |   |
| Plate07E08 | Tenoxicam                                 | Antiinflammatory      | cyclooxygenase inhibition             |   |  | + |   |    |   |
| Plate10A03 | Isopyrin hydrochloride                    | Antiinflammatory      | cyclooxygenase inhibition             |   |  | - |   | +  |   |
| Plate10B11 | Ebselen                                   | Antiinflammatory      | cyclooxygenase inhibition             | - |  |   |   | +  |   |
| Plate10H02 | (R) -Naproxen sodium salt                 | Antiinflammatory      | cyclooxygenase inhibition             |   |  |   | + |    | - |
| Plate11B07 | Suprofen                                  | Antiinflammatory      | cyclooxygenase inhibition             |   |  | - |   |    |   |
| Plate11D07 | Indoprofen                                | Antiinflammatory      | cyclooxygenase inhibition             | - |  |   |   |    |   |
| Plate11F07 | Tolmetin sodium salt dihydrate            | Antiinflammatory      | cyclooxygenase inhibition             | - |  |   |   |    | + |
| Plate10A11 | Balsalazide Sodium                        | Anti-inflammatory     | cyclooxygenase inhibition             |   |  | - |   |    |   |
| Plate13E04 | Azapropazone                              | Anti-inflammatory     | cyclooxygenase inhibition             | + |  | - |   | +  |   |
| Plate14A10 | Oxyphenbutazone                           | Anti-inflammatory     | cyclooxygenase inhibition             | - |  | - |   | +  | + |
| Plate14B11 | Oxaprozin                                 | Anti-inflammatory     | cyclooxygenase inhibition             |   |  |   |   | +  | + |
| Plate01C11 | Antipyrine, 4-hydroxy                     | Antipyrine metabolite | cyclooxygenase inhibition             |   |  | + |   |    |   |
| Plate09G06 | Methyl benzethonium chloride              | Antibacterial         | Detergent                             | - |  |   | + | -  | - |
| Plate09G09 | Benzethonium chloride                     | Antibacterial         | Detergent                             | - |  |   | - | +/ |   |
| Plate10F08 | Alexidine dihydrochloride                 | Antibacterial         | Detergent                             | - |  | - |   | -  | + |
| Plate10H03 | Propidium iodide                          | Antibacterial         | Detergent                             | + |  |   |   | +  |   |
| Plate04E06 | Chenodiol                                 | Anticholelithogenic   | Detergent                             |   |  |   | - |    | - |
| Plate02G04 | Chlorhexidine                             | Bacteriostatic        | Detergent                             |   |  | - |   |    | + |

|            |                                            |                          |                                               |   |     |     |   |   |   |
|------------|--------------------------------------------|--------------------------|-----------------------------------------------|---|-----|-----|---|---|---|
| Plate12E06 | Thonzonium bromide                         |                          | Detergent                                     | + |     |     | + |   |   |
| Plate13D10 | Proguanil hydrochloride                    | Antimalarial             | dihydrofolate reductase inhibitor             |   |     |     |   | + |   |
| Plate14F05 | Sulfadoxine                                | Antibacterial            | dihydropteroate synthase inhibitor            |   | +/- |     | + |   |   |
| Plate09A05 | N-Acetyl-DL-homocysteine Thiolactone       | Expectorant              | Disulfure bridge breaker                      | - |     |     |   |   |   |
| Plate02A10 | Ursolic acid                               | Diuretic                 | Diuretic                                      |   |     | -   |   |   |   |
| Plate02A02 | Metronidazole                              | Antibacterial            | DNA damage (bacterial)                        |   |     | -   | + |   | + |
| Plate07B03 | Nitrofurural                               | Antibacterial            | DNA damage (bacterial)                        | + |     | -   |   |   |   |
| Plate07H06 | Nifuroxazide                               | Antibacterial            | DNA damage (bacterial)                        |   |     |     |   |   | + |
| Plate10E05 | Furaltadone hydrochloride                  | Antibacterial            | DNA damage (bacterial)                        |   |     |     |   | - |   |
| Plate03A09 | Nitrofurantoin                             | Urinary antiseptic       | DNA damage (bacterial)                        |   |     |     |   |   | + |
| Plate06G10 | Niridazole                                 | Anthelmintic             | DNA damage ('Helminthic')                     |   |     | +   |   |   |   |
| Plate10E07 | Tinidazole                                 | Antiprotozoal            | DNA damage (protozoal)                        |   |     |     |   | - |   |
| Plate05D06 | Hycanthone                                 | Anthelmintic             | DNA intercalating agent                       |   |     | -   |   |   |   |
| Plate06D09 | Doxorubicin hydrochloride                  | Antibacterial            | DNA intercalating agent                       |   |     | -   |   |   | + |
| Plate08F05 | Ellipticine                                | Anticancer               | DNA Intercalating agent                       |   |     | -   | - |   |   |
| Plate07A08 | Daunorubicin hydrochloride                 | Antineoplastic           | DNA intercalating agent                       |   |     |     | + |   | + |
| Plate11D04 | Ifosfamide                                 | Antineoplastic           | DNA replication inhibitor                     |   |     |     |   | - |   |
| Plate14D10 | Chlorambucil                               | Antineoplastic           | DNA replication inhibitor                     |   |     |     | - | + |   |
| Plate05F07 | Clofazimine                                | Antileprosy              | DNA replication inhibitor (mycobacterial DNA) |   |     |     |   | - |   |
| Plate14B07 | Trifluridine                               | Antiviral (ophthalmic)   | DNA replication inhibitor (viral)             | - | -   |     | + |   |   |
| Plate10B03 | Streptozotocin                             | Antineoplastic           | DNA synthesis inhibitor                       |   |     |     |   | - | + |
| Plate10A08 | Ergocryptine-alpha                         | Vasoconstrictor          | Dopamine activator                            |   |     | +   |   |   |   |
| Plate04F06 | Pergolide mesylate                         | Antiparkinsonian         | Dopamine agonist                              |   |     |     |   | - |   |
| Plate13B11 | Piribedil hydrochloride                    | Vasodilator (peripheral) | Dopamine agonist                              |   |     |     | + |   |   |
| Plate02C02 | R(-) Apomorphine hydrochloride hemihydrate | Emetic                   | Dopamine agonist (D1)                         |   | +   | +   |   |   |   |
| Plate14F04 | (-)-Quinpirole hydrochloride               | Anti-Parkinsonian        | dopamine agonist (D2)                         |   |     |     | + |   |   |
| Plate08G09 | Salsolinol hydrobromide                    | -                        | Dopamine analog                               |   |     |     | - |   |   |
| Plate01G05 | Chlorpromazine hydrochloride               | Antiemetic               | Dopamine antagonist                           | + |     |     |   |   |   |
| Plate06F02 | Alizapride HCl                             | Antiemetic               | Dopamine antagonist                           |   |     |     | + |   |   |
| Plate08E02 | Scoulerine                                 | Antiemetic               | Dopamine antagonist                           | + | -   |     | + |   | + |
| Plate09G05 | Bromopride                                 | Antiemetic               | Dopamine antagonist                           |   |     |     | + |   |   |
| Plate04H11 | Fluphenazine dihydrochloride               | Antipsychotic            | Dopamine antagonist                           |   |     |     |   |   | - |
| Plate07C10 | Bromperidol                                | Antipsychotic            | Dopamine antagonist                           |   | +   |     |   |   |   |
| Plate07E10 | Mesoridazine besylate                      | Antipsychotic            | Dopamine antagonist                           |   | +   |     |   |   |   |
| Plate09F04 | Promazine hydrochloride                    | Antipsychotic            | Dopamine antagonist                           |   |     |     | - | + | - |
| Plate04H04 | Trifluoperazine dihydrochloride            | Psycholeptic             | Dopamine antagonist                           |   |     |     | - | - |   |
| Plate01F04 | Triflupromazine hydrochloride              | Antipsychotic            | Dopamine antagonist ?                         |   | -   |     | - |   |   |
| Plate01H11 | Trimethobenzamide hydrochloride            | Antiemetic               | Dopamine antagonist (D2)                      |   |     |     |   | - | - |
| Plate01F07 | Sulpiride                                  | Antipsychotic            | Dopamine antagonist (D2)                      |   |     | +/- |   |   |   |
| Plate05C09 | Chlorprothixene hydrochloride              | Neuroleptic              | Dopamine antagonist (D2)                      |   |     |     | - | - |   |
| Plate07H10 | DO 897/99                                  | -                        | Dopamine antagonist (D3)                      |   |     | -   |   |   |   |
| Plate04G09 | Pimozide                                   | Antipsychotic            | Dopamine antagonist ?                         |   |     |     | - |   |   |
| Plate02B08 | Disulfiram                                 | Alcohol deterrent        | Dopamine beta hydroxylase inhibitor           | + | -   | +   | + |   | + |
| Plate02C03 | Amoxapine                                  | Antidepressant           | Dopamine uptake inhibitor                     |   |     | -   | - |   |   |
| Plate05G07 | GBR 12909 dihydrochloride                  | Antidepressant           | Dopamine uptake inhibitor                     |   |     |     | + |   |   |

|            |                                   |                                                                    |                                          |   |   |   |   |     |   |
|------------|-----------------------------------|--------------------------------------------------------------------|------------------------------------------|---|---|---|---|-----|---|
| Plate09E10 | Ungerine nitrate                  | Sedative                                                           | Enhancer of analgesics                   |   |   |   |   | -   |   |
| Plate06H05 | Piperine                          | Antidiarrhoeic                                                     | Enzyme inhibitor                         |   |   |   |   |     | + |
| Plate06A09 | Butoconazole nitrate              | Antifungal                                                         | Ergosterol inhibitor                     |   |   |   | - |     | + |
| Plate06A11 | Amphotericin B                    | Antibacterial                                                      | Ergosterol ligand                        | - |   |   |   |     |   |
| Plate01G11 | Tolnaftate                        | Antifungal                                                         | Ergosterol synthesis inhibition          |   | + |   |   |     |   |
| Plate11A11 | Sulconazole nitrate               | Antifungal                                                         | Ergosterol synthesis inhibition          | - |   |   |   |     |   |
| Plate10F07 | Guaifenesin                       | Expectorant                                                        | Expectorant                              |   |   |   |   | -   |   |
| Plate03E09 | Trimethoprim                      | Antibacterial                                                      | Folic acid antagonist                    |   |   |   | - |     |   |
| Plate01D06 | Dapsone                           | Antiinflammatory                                                   | Folic acid antagonist                    |   | + |   |   |     |   |
| Plate01D08 | Pyrimethamine                     | Antiprotozoal                                                      | Folic acid antagonist                    |   | - |   |   |     |   |
| Plate09G03 | Succinylsulfathiazole             | Antibacterial                                                      | Folic acid synthesis inhibition          | - |   | + |   | +/- |   |
| Plate09H02 | Sulfabenzamide                    | Antibacterial                                                      | Folic acid synthesis inhibition          |   |   | + |   |     |   |
| Plate09H06 | Sulfachloropyridazine             | Antibacterial                                                      | Folic acid synthesis inhibition          |   |   | + |   | -   |   |
| Plate10B02 | Sulfaquinoxaline sodium salt      | Antibacterial                                                      | Folic acid synthesis inhibition          |   |   |   |   | -   |   |
| Plate10E10 | Sulfameter                        | Antibacterial                                                      | Folic acid synthesis inhibition          |   | + |   |   |     |   |
| Plate10F06 | Sulfamethazine sodium salt        | Antibacterial                                                      | Folic acid synthesis inhibition          |   |   |   |   | -   |   |
| Plate01B05 | Sulfacetamide sodic hydrate       | Antibacterial                                                      | Folic acid synthesis inhibitor           |   |   |   |   | -   |   |
| Plate01C02 | Sulfaphenazole                    | Antibacterial                                                      | Folic acid synthesis inhibitor           |   |   |   |   | -   |   |
| Plate03A07 | Mafenide hydrochloride            | Antibacterial                                                      | Folic acid synthesis inhibitor           |   |   | + |   |     |   |
| Plate03B08 | Sulfamethoxazole                  | Antibacterial                                                      | Folic acid synthesis inhibitor           |   |   |   |   | +   |   |
| Plate10A09 | Sulfadimethoxine                  | Antibacterial                                                      | Folic acid synthesis inhibitor           | - | - |   |   |     |   |
| Plate10A10 | Sulfanilamide                     | Antibacterial                                                      | Folic acid synthesis inhibitor           |   | - |   |   |     |   |
| Plate01G02 | Morantel tartrate                 | Anthelmintic                                                       | Fumarate reductase inhibitor             | + |   |   |   |     |   |
| Plate08A10 | Dihydroergotoxine mesylate        | Anticonvulsant                                                     | GABA A receptor C1-channel high affinity | + |   |   | - |     | + |
| Plate13B03 | THIP Hydrochloride                |                                                                    | GABA Agonist                             |   |   |   | + |     |   |
| Plate06D11 | Epiandrosterone                   | Anabolic steroid                                                   | GABA agonist (non competitive)           | + |   |   |   |     |   |
| Plate07F10 | Thiocolchicoside                  | Muscle relaxant                                                    | GABA agonist ?                           | + | - |   |   |     |   |
| Plate03A03 | Pentylenetetrazole                | CNS stimulant                                                      | GABA antagonist                          |   |   | + |   | +   |   |
| Plate11E02 | Securinine                        | CNS stimulant                                                      | GABA antagonist                          |   |   |   |   |     | - |
| Plate09C03 | Gelsemine                         | Tumour inhibitor                                                   | GABA antagonist                          | - |   |   |   |     |   |
| Plate08C10 | Bicuculline (+)                   | Convulsant                                                         | GABA antagonist (GABAa)                  |   |   |   | + |     |   |
| Plate09B03 | Picrotoxinin                      | Analeptic                                                          | GABA channel blocker                     | - |   | + |   |     |   |
| Plate14A02 | Etomidate                         | Hypnotic                                                           | GABA receptor (GABAa)                    |   |   |   | + |     |   |
| Plate11G02 | Gabapentin                        | Anticonvulsant                                                     | GABA receptor ligand                     | + |   |   |   |     |   |
| Plate13B07 | Tracazolate hydrochloride         |                                                                    | GABA receptor ligand                     |   |   |   | + |     |   |
| Plate12F02 | Propofol                          | Anesthetic (intravenous)                                           | GABA receptor stimulation                |   |   |   |   | +   |   |
| Plate13E03 | Alfaxalone                        | In combination with alfadolone acetate as anesthetic (intravenous) | GABA receptor stimulation                |   |   |   | + |     |   |
| Plate13E02 | Alfadolone acetate                | In combination with alfaxalone as anesthetic (intravenous)         | GABA receptor stimulation                |   |   |   | + |     |   |
| Plate09B11 | Avermectin B1                     | Anthelmintic                                                       | GABA receptors ligand                    |   |   |   |   | -   |   |
| Plate01D09 | Hexamethonium dibromide dihydrate | Antihypertensor                                                    | Ganglion blocker                         |   | + |   |   |     |   |
| Plate14H02 | Mecamylamine hydrochloride        | Antihypertensor                                                    | Ganglion blocker                         | - |   |   | + |     |   |
| Plate05A04 | Chlorpropamide                    | Antidiabetic                                                       | Glucagon secretogen                      | - |   |   |   |     |   |
| Plate13D08 | Fluticasone propionate            | Antiallergic                                                       | glucocorticoid                           |   |   |   |   | -   |   |
| Plate13F11 | Rimexolone                        | Anti-inflammatory (local)                                          | Glucocorticoid                           |   |   |   |   | +   |   |
| Plate04D10 | Methylprednisolone, 6-alpha       | Glucocorticoid                                                     | Glucocorticoid                           |   |   |   | - |     |   |

|            |                                         |                             |                                                     |   |     |     |     |   |   |
|------------|-----------------------------------------|-----------------------------|-----------------------------------------------------|---|-----|-----|-----|---|---|
| Plate09A04 | Flunisolide                             | Glucocorticoid              | Glucocorticoid                                      |   |     | +   |     |   |   |
| Plate09A06 | Flurandrenolide                         | Glucocorticoid              | Glucocorticoid                                      |   |     | +   |     |   |   |
| Plate09H09 | Fluorometholone                         | Glucocorticoid              | Glucocorticoid                                      |   |     | +/- |     | - |   |
| Plate10B05 | Flumethasone                            | Glucocorticoid              | Glucocorticoid                                      |   |     |     |     |   | - |
| Plate10C04 | Medrysone                               | Glucocorticoid              | Glucocorticoid                                      | - |     |     |     |   |   |
| Plate10F05 | Fluocinonide                            | Glucocorticoid              | Glucocorticoid                                      |   |     |     |     | - |   |
| Plate10G02 | Clobetasol propionate                   | Glucocorticoid              | Glucocorticoid                                      |   | -   |     | -   | - |   |
| Plate14A05 | Prednicarbate                           | Glucocorticoid (topical)    | Glucocorticoid                                      |   |     |     | +/- |   |   |
| Plate10F02 | Alclometasone dipropionate              | Anti-inflammatory           | glucocorticoid receptor agonist                     |   |     | -   |     |   |   |
| Plate03F08 | Mebendazole                             | Parasite suppressor         | Glucose transport inhibitor ?                       | + | -   |     | +   |   |   |
| Plate09C06 | Evoxine                                 | Sedative                    | Glycine receptor antagonist                         |   |     |     |     | - |   |
| Plate07B04 | Omeprazole                              | Antiulcerative              | H+ pump inhibitor (ATPase H+ pump, non competitive) | + |     |     |     |   |   |
| Plate04D11 | Quinidine hydrochloride monohydrate     | Antiarrhythmic              | Heme polymerase inhibitor                           |   |     | -   |     |   |   |
| Plate02E07 | Mefloquine hydrochloride                | Antimalarial                | Heme polymerase inhibitor                           | + | +/- |     | +   | - |   |
| Plate04G10 | Amodiaquin dihydrochloride dihydrate    | Antimalarial                | Heme polymerase inhibitor                           |   |     |     | -   |   | - |
| Plate06H07 | Primaquine diphosphate                  | Antimalarial                | Heme polymerase inhibitor                           |   | +/- | +   | +   | - | + |
| Plate07G09 | Chloroquine diphosphate                 | Antipaludic                 | Heme polymerase inhibitor                           |   | +   |     |     |   |   |
| Plate01E04 | Betazole hydrochloride                  | Gastric secretion stimulant | Histamine analog                                    | + |     |     |     |   |   |
| Plate10H08 | Methotrimeprazine maleate salt          | Analgesic                   | Histamine antagonist                                | + |     |     | +   |   | - |
| Plate09G07 | Chlorcyclizine hydrochloride            | Antihistaminic              | Histamine antagonist                                |   |     | +   |     | - |   |
| Plate11E03 | Trimeprazine tartrate                   | Antipruritic                | Histamine antagonist                                |   | -   |     | -   |   |   |
| Plate10H04 | Cloperastine hydrochloride              | Antitussive                 | Histamine antagonist                                | + |     |     | +/- |   |   |
| Plate07C11 | Cyclizine hydrochloride                 | Antiemetic                  | Histamine antagonist (H1)                           |   | +   |     |     |   |   |
| Plate01C08 | Doxylamine succinate                    | Antihistaminic              | Histamine antagonist (H1)                           |   | +   |     |     |   |   |
| Plate01F10 | Pheniramine maleate                     | Antihistaminic              | Histamine antagonist (H1)                           |   | +/- |     |     |   |   |
| Plate01G06 | Diphenhydramine hydrochloride           | Antihistaminic              | Histamine antagonist (H1)                           |   | +   |     |     |   |   |
| Plate02F07 | Astemizole                              | Antihistaminic              | Histamine antagonist (H1)                           | - | -   |     | -   | - | - |
| Plate04C03 | Triprolidine hydrochloride              | Antihistaminic              | Histamine antagonist (H1)                           |   | -   |     |     |   |   |
| Plate04C06 | Dimenhydrinate                          | Antihistaminic              | Histamine antagonist (H1)                           |   |     |     |     | - |   |
| Plate04E04 | Homochlorcyclizine dihydrochloride      | Antihistaminic              | Histamine antagonist (H1)                           |   |     |     | -   |   |   |
| Plate04G07 | Clemastine fumarate                     | Antihistaminic              | Histamine antagonist (H1)                           |   |     |     | -   | - |   |
| Plate06F06 | Mebhydroline 1,5-naphthalenedisulfonate | Antihistaminic              | Histamine antagonist (H1)                           | + |     |     |     |   |   |
| Plate06H06 | Brompheniramine maleate                 | Antihistaminic              | Histamine antagonist (H1)                           |   |     |     |     |   | + |
| Plate07C04 | Cetirizine dihydrochloride              | Antihistaminic              | Histamine antagonist (H1)                           |   |     |     | +   |   |   |
| Plate11A08 | Chloropyramine hydrochloride            | Antihistaminic              | Histamine antagonist (H1)                           |   |     | +   |     |   |   |
| Plate12A09 | Promethazine hydrochloride              | Antihistaminic              | Histamine antagonist (H1)                           | + |     |     |     | - |   |
| Plate06C09 | Roxatidine Acetate HCl                  | Antiulcerative              | Histamine antagonist (H2)                           | + | +/- |     | +   |   | + |
| Plate12E02 | Nizatidine                              | Antiulcerative              | Histamine antagonist (H2)                           |   |     |     | +   |   |   |
| Plate09B10 | 6-Furfurylaminopurine                   | Plant growth accelerator    | Hormone (plants)                                    |   |     |     |     | - |   |
| Plate06B02 | Androsterone                            | Antihypertensor             | Hormone (steroid)                                   |   |     | -   |     | - |   |
| Plate11F04 | Liothyronine                            | Thyroidic drug              | Hormone (Thyroid)                                   |   |     |     |     | - |   |
| Plate06A02 | Testosterone propionate                 | Androgen                    | hormone Androgen                                    |   |     | +   |     |   |   |
| Plate07G07 | Pregnenolone                            | Androgen                    | Hormone androgen                                    |   | +   |     |     | - |   |
| Plate03B11 | Flutamide                               | Anticancer                  | hormone androgen receptor antagonist                | - |     |     | -   |   |   |

|            |                                      |                                                                   |                                                                                  |     |     |   |  |     |   |   |
|------------|--------------------------------------|-------------------------------------------------------------------|----------------------------------------------------------------------------------|-----|-----|---|--|-----|---|---|
| Plate14D05 | Cyproterone acetate                  | Antiandrogen                                                      | hormone antiandrogen                                                             |     |     |   |  | +   |   |   |
| Plate13E07 | Epitiostanol                         | Antineoplastic                                                    | hormone antiestrogen                                                             |     |     |   |  | +   |   |   |
| Plate09E09 | Estropipate                          | Estrogen                                                          | Hormone estrogen                                                                 |     |     | - |  |     |   |   |
| Plate10D07 | Diethylstilbestrol                   | Estrogen                                                          | Hormone estrogen                                                                 |     |     |   |  | +   | - | - |
| Plate11E07 | Ethinylestradiol 3-methyl ether      | Estrogen                                                          | Hormone estrogen                                                                 | -   |     |   |  |     |   |   |
| Plate11E11 | Equilin                              | Estrogen                                                          | Hormone estrogen                                                                 | -   |     |   |  |     |   |   |
| Plate11G03 | Raloxifene hydrochloride             |                                                                   | hormone Estrogen agonist                                                         | +   |     |   |  | -   |   | - |
| Plate05H08 | Clomiphene citrate (Z,E)             | Antineoplastic                                                    | hormone Estrogen agonist                                                         |     | -   |   |  |     |   |   |
| Plate02C06 | Danazol                              | Antigonadotropin                                                  | hormone Estrogen antagonist                                                      | +   |     |   |  | +   | - | + |
| Plate06H08 | Progesterone                         | Progestogen                                                       | Hormone progestogen                                                              |     |     |   |  |     |   | + |
| Plate09D02 | Dydrogesterone                       | Progestogen                                                       | Hormone progestogen                                                              | -   |     |   |  |     |   |   |
| Plate12H07 | Megestrol acetate                    | Progestogen                                                       | Hormone progestogen                                                              |     | -   |   |  |     |   |   |
| Plate09D06 | Hippeastrine hydrobromide            | Hypotensor                                                        | Hypotensor                                                                       |     |     |   |  |     | - |   |
| Plate09E06 | Nitrarine dihydrochloride            | Hypotensor                                                        | Hypotensor                                                                       |     |     |   |  |     | - |   |
| Plate11E06 | Amiprilose hydrochloride             | Immunomodulator                                                   | Immunomodulator                                                                  |     |     |   |  |     | - |   |
| Plate03D03 | Thalidomide                          | Immunosuppressant                                                 | Immunosuppressant                                                                |     | -   |   |  |     |   |   |
| Plate07H07 | Mycophenolic acid                    | Antineoplastic                                                    | Inosine monophosphate dehydrogenase inhibitor                                    | -   | -   |   |  | +   |   | + |
| Plate02E03 | Metanephrine hydrochloride DL        |                                                                   | Isoprenaline uptake inhibitor extraneuronal                                      |     | -   | - |  |     |   |   |
| Plate01B11 | Minoxidil                            | Antihypertensor                                                   | K+ channel activator                                                             |     | +   |   |  |     |   |   |
| Plate02C07 | Nicorandil                           | Antihypertensor                                                   | K+ channel agonist (ATP-dependent channels)                                      |     |     |   |  |     | - |   |
| Plate13A07 | Sotalol hydrochloride                | Antianginal                                                       | K+ channel antagonist                                                            | +   |     |   |  | +   |   |   |
| Plate07H05 | Tolazamide                           | Antidiabetic                                                      | K+ channel blocker (ATP-dependent channels)                                      |     |     |   |  | -   | + | + |
| Plate01F06 | Acetohexamide                        | Antidiabetic (type II, noninsulin-dependent)                      | K+ channel blocker (ATP-dependent channels)                                      |     | +/- |   |  |     |   |   |
| Plate05G09 | Dequalinium dichloride               | Antibacterial                                                     | K+ channel blocker (Ca2+-dependent channels, apamin-sensitive small conductance) |     |     |   |  | +   |   |   |
| Plate04D06 | Fenofibrate                          | Hypolipidemiant                                                   | Lipoprotein lipase activator                                                     |     |     |   |  |     | - |   |
| Plate10G04 | Clofibric acid                       | Antihyperlipoproteinemic                                          | Lipoprotein lipase activator ?                                                   |     | -   |   |  |     |   |   |
| Plate04E05 | Diethylcarbamazine citrate           | Antihelminthic                                                    | Lipoxygenase inhibitor                                                           |     |     | - |  |     | - |   |
| Plate07C08 | Quercetine dihydrate                 | Antimalarial                                                      | Lipoxygenase inhibitor                                                           |     | +   |   |  |     |   |   |
| Plate08F03 | Harmol hydrochloride monohydrate     | Anxiolytic                                                        | Liver conjugation probe                                                          |     | +   | - |  | +   |   |   |
| Plate11H07 | Arcaïne sulfate                      |                                                                   | Lowers blood sugar                                                               | +/- |     |   |  |     |   |   |
| Plate12A04 | Digoxigenin                          | Diagnosis                                                         | Mainly used as a non-isotopic label for DNA                                      |     |     |   |  | +/- |   | + |
| Plate03A11 | Phenelzine sulfate                   | Antidepressant                                                    | MAO inhibitor                                                                    | -   |     |   |  |     |   |   |
| Plate10H06 | Isocarboxazid                        | Antidepressant                                                    | MAO inhibitor                                                                    |     |     |   |  | +   |   | + |
| Plate14F10 | Nialamide                            | Antidepressant                                                    | MAO inhibitor                                                                    |     |     | - |  |     |   |   |
| Plate08F04 | Harmine hydrochloride                | Antihelminthic                                                    | MAO inhibitor                                                                    |     |     |   |  | +   |   | + |
| Plate04H09 | Quinacrine dihydrochloride dihydrate | Antimalarial                                                      | MAO inhibitor                                                                    |     | -   |   |  | -   |   | + |
| Plate13B04 | Pirlindole mesylate                  | highly selective reversible inhibitor of monoamine oxidase type A | MAO inhibitor                                                                    |     |     |   |  |     |   | - |
| Plate07H03 | Selegiline hydrochloride             | Antiparkinsonian                                                  | MAO inhibitor (Monoamine B)                                                      |     |     |   |  |     |   | + |
| Plate07G11 | Parthenolide                         | Antiinflammatory                                                  | MAPK inhibitor                                                                   |     | -   | + |  | +   |   | + |
| Plate11H04 | Theophylline monohydrate             | Bronchodilatator                                                  | Mastocyte degranulation inhibitor in vitro                                       | +   | -   |   |  |     | - |   |

|            |                                |                                 |                                            |   |     |   |     |   |   |
|------------|--------------------------------|---------------------------------|--------------------------------------------|---|-----|---|-----|---|---|
| Plate12D03 | Monobenzene                    | Depigmentor                     | melanin inhibition                         |   | -   |   |     |   |   |
| Plate09A07 | Helveticoside                  | Cardiotonic                     | membrane ATP inhibitor                     |   |     | + | +   |   | + |
| Plate10C09 | Monensin sodium salt           | Antibacterial                   | Membrane ionophores producer               |   | -   |   | +   |   |   |
| Plate07D08 | Nystatine                      | Antifungal                      | Membrane ionophores producer               |   | +   |   |     |   |   |
| Plate04B11 | Praziquantel                   | Anthelmintic                    | Membrane permeability modulator            |   |     | - |     |   |   |
| Plate03E11 | Fenbendazole                   | Anthelmintic                    | microtubule polymerisation inhibitor       | + | -   |   | +/- |   | + |
| Plate05E04 | Colchicine                     | Antiinflammatory                | microtubule polymerisation inhibitor       | + | -   |   | +   | - | + |
| Plate02B11 | Nocodazole                     | Antineoplastic                  | microtubule polymerisation inhibitor       | + | -   | + | +   |   | + |
| Plate02H06 | Paclitaxel                     | Antineoplastic                  | microtubule polymerisation inhibitor       | + | +/- | + | +   |   | + |
| Plate04A08 | Albendazole                    |                                 | microtubule polymerization inhibition      | + | -   |   | +   |   | + |
| Plate10G03 | Podophyllotoxin                | Antiviral                       | Microtubule polymerization inhibitor       | + | -   |   | +/- | - | + |
| Plate12H08 | Deoxycorticosterone            | Mineralocorticoid               | Mineralocorticoid                          |   |     |   |     | + |   |
| Plate03G03 | Antimycin A                    | Antifungal                      | Mitochondrial electron transport inhibitor | - | -   |   |     |   |   |
| Plate14C05 | Mepylcaine hydrochloride       | Local anesthetic                | Monoamine transport inhibition             |   |     |   | +   |   |   |
| Plate11D08 | Carbenoxolone disodium salt    | Antiulcerative                  | Mucus stimulating synthesis                |   |     |   |     | - |   |
| Plate11E05 | Procyclidine hydrochloride     | Antiparkinsonian                | Muscarinic antagonist                      |   |     |   |     | - |   |
| Plate01G03 | Homatropine hydrobromide (R,S) | Antispasmodic                   | Muscarinic antagonist                      | + |     |   |     | - |   |
| Plate11C11 | Ethaverine hydrochloride       | Antispasmodic                   | Muscarinic antagonist ?                    | - |     |   |     |   |   |
| Plate03H05 | Chlorphensin carbamate         | Muscle relaxant                 | Muscle relaxant                            |   |     |   | -   |   |   |
| Plate09H03 | Benzocaine                     | Anesthetic                      | Na+ channel blocker                        | - |     | + |     | - |   |
| Plate01B02 | Meticrane                      | Antihypertensor                 | Na+ channel blocker                        | + |     |   |     |   |   |
| Plate01E02 | Procaine hydrochloride         | Local anesthetic                | Na+ channel blocker                        |   |     |   |     | - |   |
| Plate01E10 | Amyleine hydrochloride         | Local Anesthetic                | Na+ channel blocker                        |   | +   | - |     |   |   |
| Plate01E11 | Lidocaine hydrochloride        | Local anesthetic                | Na+ channel blocker                        |   | +   |   |     |   |   |
| Plate01F08 | Benoxinate hydrochloride       | Local anesthetic                | Na+ channel blocker                        |   | -   |   |     |   |   |
| Plate01F09 | Oxethazaine                    | Local anesthetic                | Na+ channel blocker                        |   | +/- |   |     |   |   |
| Plate04G06 | Bupivacaine hydrochloride      | Local anesthetic                | Na+ channel blocker                        |   |     |   |     | - |   |
| Plate09H07 | Pramoxine hydrochloride        | Local anesthetic                | Na+ channel inhibitor (voltage-dependent)  |   |     | + |     |   |   |
| Plate12H10 | Proparacaine hydrochloride     | Topical anesthetic (ophthalmic) | Na+ channel inhibitor (voltage-dependent)  |   |     |   |     | + |   |
| Plate10G05 | Bendroflumethiazide            | Antihypertensor                 | Na+ Cl- transport inhibitor                |   | -   |   |     |   |   |
| Plate01A10 | Hydrochlorothiazide            | Diuretic                        | Na+ Cl- transport inhibitor                | + |     |   |     |   |   |
| Plate03F11 | Indapamide                     | Antihypertensor                 | Na+ Cl- uptake inhibitor                   |   | -   |   |     |   |   |
| Plate05C02 | Furosemide                     | Diuretic                        | Na+ Cl- uptake inhibitor                   |   | -   | + |     |   |   |
| Plate14A11 | Quinethazone                   | Diuretic                        | Na+ Cl- uptake inhibitor                   |   |     | - |     |   |   |
| Plate13C08 | Sanguinarine                   | Antimicrobial drug              | Na+ K+ ATPase inhibitor                    |   |     |   |     | - |   |
| Plate06D07 | Digitoxigenin                  | Cardiotonic                     | Na+ K+ ATPase inhibitor                    |   |     |   | +   |   | + |
| Plate06D08 | Digoxin                        | Cardiotonic                     | Na+ K+ ATPase inhibitor                    |   |     |   | +   |   | + |
| Plate06H02 | Strophantine octahydrate       | Cardiotonic                     | Na+ K+ ATPase inhibitor                    |   | -   |   | +   |   | + |
| Plate09B07 | Lanatoside C                   | Cardiotonic                     | Na+ K+ ATPase inhibitor                    |   |     |   | +   |   | + |
| Plate13G08 | Tocainide hydrochloride        | Antiarrhythmic                  | Na+ K+ transport inhibition                |   |     |   |     | - |   |
| Plate13G11 | Torsemide                      | Diuretic                        | Na+ uptake inhibitor                       |   |     |   | +   | + |   |
| Plate14A08 | Piretanide                     | Diuretic                        | Na+ uptake inhibitor                       |   | -   |   |     |   |   |



|            |                                           |                            |                                   |   |     |  |   |   |     |
|------------|-------------------------------------------|----------------------------|-----------------------------------|---|-----|--|---|---|-----|
| Plate01A06 | Atracurium besylate                       | Curarizing agent           | Neuromuscular blocking agent      |   |     |  |   |   |     |
| Plate03F03 | Pyrantel tartrate                         | Anthelmintic               | Neuromuscular depolarizing agent  |   | -   |  |   |   |     |
| Plate13A09 | Decamethonium bromide                     | Muscle relaxant (skeletal) | Neuromuscular depolarizing agent  |   |     |  | + |   |     |
| Plate08H04 | Thiorphan                                 | Antinociceptive            | Neutral endopeptidase inhibitor   | + |     |  |   |   |     |
| Plate09D10 | Delsoline                                 |                            | Nicotinic antagonist              | + | +   |  |   |   |     |
| Plate09C10 | Anabasine                                 | Insecticide                | Nicotinic receptor ligand         | + |     |  |   | - |     |
| Plate09E03 | beta- Belladonnine dichloroethylate       | Muscle relaxant            | Nicotinic receptor ligand         | - |     |  |   |   |     |
| Plate09H05 | Isosorbide dinitrate                      | Antianginal                | Nitric oxide donor                |   |     |  | + |   |     |
| Plate05E07 | Ambroxol hydrochloride                    | Expectorant                | Nitric oxide inhibitor            |   |     |  |   | - |     |
| Plate07G08 | Molsidomine                               | Vasodilator                | Nitric oxide production ?         |   | +   |  |   |   |     |
| Plate13B09 | Memantine Hydrochloride                   | Antiparkinsonian           | NMDA receptor antagonist          |   |     |  | + |   |     |
| Plate14F02 | Spaglumic acid                            |                            | NMDA receptor ligands             |   |     |  |   | - |     |
| Plate02C10 | Dizocilpine maleate                       | -                          | NMDA receptor probe               |   | -   |  |   |   |     |
| Plate07F08 | Piracetam                                 | Nootropic drug             | Nootropic agent                   |   | +   |  |   |   |     |
| Plate01B06 | Heptaminol hydrochloride                  | Antihypertensive           | Noradrenaline increase            |   | +   |  |   |   |     |
| Plate12C11 | Nisoxetine hydrochloride                  |                            | Noradrenaline inhibitor           |   |     |  |   |   | -   |
| Plate04C10 | Clomipramine hydrochloride                | Antidepressant             | Noradrenaline uptake inhibitor    |   |     |  |   | - |     |
| Plate05C07 | Maprotiline hydrochloride                 | Antidepressant             | Noradrenaline uptake inhibitor    |   | -   |  | - |   |     |
| Plate11A07 | Trimipramine maleate salt                 | Antidepressant             | Noradrenaline uptake inhibitor    | - |     |  |   |   |     |
| Plate04B05 | Nortriptyline hydrochloride               | Antidepressant             | Norepinephrine uptake inhibitor   |   |     |  | - | - |     |
| Plate01D03 | Epirizole                                 | Analgesic                  | NSAI                              |   |     |  |   | - |     |
| Plate09G04 | Famprofazone                              | Analgesic                  | NSAI                              |   |     |  | + |   | +/- |
| Plate14G05 | Clonixin Lysinate                         | Analgesic                  | NSAI                              | + |     |  | + |   |     |
| Plate09F10 | Hexestrol                                 | Estrogen antineoplastic    | Nuclear receptor ligand           | + |     |  |   |   |     |
| Plate10H09 | Dienestrol                                | Non-steroidal estrogen     | Nuclear receptor ligand           |   | -   |  | + |   |     |
| Plate01B09 | Idoxuridine                               | Antiviral                  | Nucleic acid synthesis inhibitors |   | +/- |  |   |   | -   |
| Plate02D02 | Naloxone hydrochloride                    | Opiate antidote            | Opioid antagonist                 |   |     |  | + |   |     |
| Plate05D10 | Dextromethorphan hydrobromide monohydrate | Antitussive                | Opioid ligand                     |   |     |  |   |   | -   |
| Plate13E05 | Meptazinol hydrochloride                  | Analgesic (narcotic)       | opioid recepto activator          |   |     |  | + |   |     |
| Plate14G04 | Quinic acid                               |                            | opioid receptor modulator         | + |     |  | + |   |     |
| Plate13G06 | Letrozole                                 | Antineoplastic             | P450 inhibitor                    |   |     |  | - |   |     |
| Plate02E05 | Hesperetin                                |                            | P450 inhibitor                    |   | -   |  |   |   |     |
| Plate10F09 | Proadifen hydrochloride                   | Local anesthetic           | P450 inhibitor (mono-oxygenases)  | - | -   |  |   | - | -   |
| Plate05G10 | Ketoconazole                              | Antifungal                 | P450 inhibitor (P450c17)          |   |     |  | + |   |     |
| Plate04A03 | Flavoxate hydrochloride                   | Antispasmodic              | Phosphodiesterase inhibitor       |   |     |  | + |   |     |
| Plate08C08 | Cilostazol                                | Antithrombotic             | Phosphodiesterase inhibitor       | + | -   |  | + |   | +   |
| Plate01D04 | Diprophylline                             | Cardiac analeptic          | Phosphodiesterase inhibitor       | + |     |  |   |   |     |
| Plate03B03 | Etofylline                                | Cardiac analeptic          | Phosphodiesterase inhibitor       |   |     |  |   | + |     |
| Plate04C09 | Vinpocetine                               | Nootropic drug             | Phosphodiesterase inhibitor       |   |     |  | - |   |     |
| Plate13F03 | Trapidil                                  | Vasodilator (coronary)     | phosphodiesterase inhibitor       |   |     |  | + |   |     |
| Plate09A02 | Sulmazole                                 | Cardiotonic                | Phosphodiesterase inhibitor (III) |   |     |  | + |   |     |
| Plate10H11 | Amrinone                                  | Cardiotonic                | Phosphodiesterase inhibitor (III) |   |     |  | + |   |     |
| Plate13B08 | Zardaverine                               |                            | Phosphodiesterase inhibitor (III) | + |     |  |   | - |     |
| Plate12H11 | Aminocaproic acid                         | Hemostatic                 | Plasminogen inhibitor             |   |     |  |   | + |     |
| Plate12D10 | Bacitracin                                | Antibacterial              | Polypeptide toxin                 |   | +   |  |   |   |     |
| Plate01A03 | Allantoin                                 | Vulnerary                  | Precipitate proteins              |   |     |  | + |   |     |

|            |                              |                                                      |                                         |   |     |   |   |   |   |
|------------|------------------------------|------------------------------------------------------|-----------------------------------------|---|-----|---|---|---|---|
| Plate01C05 | Norethynodrel                | Progestogen                                          | Progesterone receptor agonist           |   |     |   |   | - |   |
| Plate04C02 | Ethisterone                  | Progestogen                                          | Progesterone receptor agonist           |   | -   |   |   |   |   |
| Plate02E02 | Bromocryptine mesylate       | Antiparkinsonian                                     | Prolactin inhibitor                     |   | -   |   |   |   |   |
| Plate13F09 | Alprostadil                  | Vasodilator                                          | Prostaglandine E1 receptor ligand       |   |     |   |   | + |   |
| Plate04B06 | Niflumic acid                | Analgesic                                            | Prostaglandine synthesis inhibitor      |   |     |   |   | - |   |
| Plate06F11 | Dinoprost trometamol         | Smooth muscle activator                              | Prostaglandin agonist                   | - |     |   |   |   |   |
| Plate14H05 | Saquinavir mesylate          | Antiviral (HIV)                                      | Protease inhibitor                      |   | -   |   | + |   |   |
| Plate02G07 | Tamoxifen citrate            | Anticancer                                           | Protein kinase C inhibitor              |   |     |   |   |   | + |
| Plate08A11 | Emetine dihydrochloride      | Antiemetic                                           | Protein synthesis inhibitor             | + | +   |   | + |   | + |
| Plate10G11 | Cycloheximide                | Antibacterial                                        | Protein synthesis inhibitor             | + | -   |   | + |   | + |
| Plate13A05 | Methacycline hydrochloride   | Antibacterial                                        | Protein synthesis inhibitor (bacteria)  |   |     |   | + |   |   |
| Plate09E07 | Lycorine hydrochloride       | Antitumoral                                          | Protein translation inhibitor           | + | -   |   | + |   | + |
| Plate13E09 | Gabexate mesilate            | Severe acute pancreatitis                            | Proteinase inhibitor                    |   |     |   | + |   |   |
| Plate03F06 | Mefexamide hydrochloride     | Psychoanaesthetic                                    | Psychoanaesthetic                       |   | -   |   |   |   |   |
| Plate01A02 | Azaguanine-8                 | Antineoplastic                                       | Purine antimetabolite                   | + | +   |   | + |   | + |
| Plate11H02 | Iopamidol                    | Diagnostic aid (radiopaque medium)                   | Radiocontrast agent                     | + | -   |   |   | - |   |
| Plate12F10 | Iodipamide                   | Diagnostic aid (radiopaque medium-cholecystographic) | Radiocontrast agent                     |   | +   |   |   |   |   |
| Plate12A05 | Meglumine                    | Expectorant                                          | Radiocontrast agent                     | + |     |   |   |   |   |
| Plate11H03 | Iopromide                    |                                                      | Radiocontrast agent                     |   | -   |   |   | - |   |
| Plate03C10 | Aminopurine, 6-benzyl        |                                                      | Respiratory kinase inhibitor (plants)   |   | +   |   |   |   |   |
| Plate13H08 | Zalcitabine                  | Antiviral (HIV)                                      | Reverse transcriptase inhibitor         |   |     |   |   | - |   |
| Plate01D02 | Chloramphenicol              | Antibacterial                                        | Ribosomal peptidyltransferase inhibitor | + |     |   |   | - |   |
| Plate01C06 | Thiamphenicol                | Antibacterial                                        | Ribosomal protein synthesis inhibitor   |   | +   |   |   | - |   |
| Plate02H02 | Erythromycin                 | Antibacterial                                        | Ribosomal protein synthesis inhibitor   |   |     | + |   |   |   |
| Plate02H03 | Oleandomycin phosphate       | Antibacterial                                        | Ribosomal protein synthesis inhibitor   |   |     | + |   |   | - |
| Plate04H06 | Minocycline hydrochloride    | Antibacterial                                        | Ribosomal protein synthesis inhibitor   |   |     |   |   | - |   |
| Plate05A02 | Streptomycin sulfate         | Antibacterial                                        | Ribosomal protein synthesis inhibitor   |   | -   |   |   |   |   |
| Plate05H05 | Kanamycin A sulfate          | Antibacterial                                        | Ribosomal protein synthesis inhibitor   |   |     |   |   |   | + |
| Plate07C07 | Sisomicin sulfate            | Antibacterial                                        | Ribosomal protein synthesis inhibitor   |   | +   |   |   |   |   |
| Plate07H08 | Dirithromycin                | Antibacterial                                        | Ribosomal protein synthesis inhibitor   |   |     |   |   |   | + |
| Plate09A11 | Butirosin disulfate salt     | Antibacterial                                        | Ribosomal protein synthesis inhibitor   |   |     |   |   | - |   |
| Plate10D04 | Demeclocycline hydrochloride | Antibacterial                                        | Ribosomal protein synthesis inhibitor   |   |     |   |   | - |   |
| Plate11F05 | Roxithromycin                | Antibacterial                                        | Ribosomal protein synthesis inhibitor   |   |     |   | + |   |   |
| Plate07E06 | Rifampicin                   | Antibacterial                                        | RNA polymerase inhibitor                |   |     |   | - | - |   |
| Plate13D04 | Ribavirin                    | Antiviral                                            | RNA synthesis inhibitor (viral)         |   |     |   | + |   |   |
| Plate12H02 | Crotamiton                   | Scabicide                                            | Scabicide                               |   |     |   |   | + |   |
| Plate13F10 | Tribenoside                  | Sclerosing agent                                     | Sclerosing agent                        |   |     |   | + |   |   |
| Plate12A06 | Cantharidin                  | Rubefiant                                            | Serine protease releaser                | + | +/- | + | + |   |   |
| Plate02G11 | Dihydroergotamine tartrate   | Antimigraine                                         | Serotonin antagonist                    |   |     | - |   |   |   |
| Plate12E11 | Protriptyline hydrochloride  | Antidepressant                                       | serotonin reuptake inhibitor            |   |     |   | - |   |   |
| Plate13D06 | Fluvoxamine maleate          | Antidepressant                                       | serotonin reuptake inhibitor            |   |     |   |   |   | - |
| Plate05G08 | Carbetapentane citrate       | Antitussive                                          | Sigma1 receptor ligand                  |   |     |   | + | - |   |
| Plate12G03 | Bretylum tosylate            | Antiadrenergic                                       | SNS inhibition                          |   |     |   |   | + |   |
| Plate10G10 | Drofenine hydrochloride      | Spasmolytic                                          | Spasmolytic                             |   |     |   | + |   |   |
| Plate02E08 | Isoconazole                  | Antibacterial                                        | Sterol 14-demethylase inhibitor         |   |     |   |   |   | + |

|            |                                         |                                               |                                                      |   |     |   |   |   |   |
|------------|-----------------------------------------|-----------------------------------------------|------------------------------------------------------|---|-----|---|---|---|---|
| Plate07B06 | Terconazole                             | Antifungal                                    | Sterol 14-demethylase inhibitor                      |   |     |   |   | - | - |
| Plate01B03 | Benzonatate                             | Antitussive                                   | Stretch receptor sensitivity decrease                | + |     |   |   |   |   |
| Plate01A09 | Amprolium hydrochloride                 | Coccidiostatic                                | Thiamine transport inhibitor                         |   | +   |   |   |   |   |
| Plate14E11 | Homosalate                              |                                               | Tool for uv screen                                   |   |     |   | + |   |   |
| Plate09F06 | Acacetin                                | Anti-oxidant                                  | Topoisomerase I inhibitor                            |   |     |   |   | - |   |
| Plate03D11 | Camptothecine (S,+)                     | Antitumor agent                               | Topoisomerase I inhibitor                            |   | -   |   | + |   | + |
| Plate14F09 | Kaempferol                              | Anti-inflammatory                             | Topoisomerase I inhibitor                            |   | +/- | - |   |   |   |
| Plate03D04 | Oxolinic acid                           | Antibacterial                                 | Topoisomerase II inhibitor                           |   | -   |   |   |   |   |
| Plate03E05 | Flumequine                              | Antibacterial                                 | Topoisomerase II inhibitor                           |   |     |   |   | + |   |
| Plate05G06 | Mitoxantrone dihydrochloride            | Antineoplastic                                | topoisomerase II inhibitor                           | + | -   |   | + |   | + |
| Plate05H07 | Etoposide                               | Antineoplastic                                | Topoisomerase II inhibitor                           |   | +/- |   |   | - |   |
| Plate07H04 | Pentamidine isethionate                 | Antiparasitic                                 | Topoisomerase inhibition                             |   |     |   |   |   | + |
| Plate14H11 | Nadifloxacin                            | Antibacterial                                 | Topoisomerase inhibitor (topoisomerase II)           | - | +   | - |   |   |   |
| Plate03H06 | Metampicillin sodium salt               | Antibacterial                                 | transpeptidase inhibitor (bacterial)                 | + |     |   |   |   |   |
| Plate06E11 | Dicloxacillin sodium salt               | Antibacterial                                 | transpeptidase inhibitor (bacterial)                 | - |     |   |   |   |   |
| Plate07A06 | Cefaclor                                | Antibacterial                                 | transpeptidase inhibitor (bacterial)                 | - |     |   |   | - |   |
| Plate07D10 | Imipenem                                | Antibacterial                                 | transpeptidase inhibitor (bacterial)                 |   | +   |   |   |   |   |
| Plate09H10 | Cephalothin sodium salt                 | Antibacterial                                 | transpeptidase inhibitor (bacterial)                 |   |     |   | + |   |   |
| Plate09H11 | Cefuroxime sodium salt                  | Antibacterial                                 | transpeptidase inhibitor (bacterial)                 | + |     | + |   |   |   |
| Plate10A04 | Phenethicillin potassium salt           | Antibacterial                                 | Transpeptidase inhibitor (bacterial)                 |   | -   |   |   |   |   |
| Plate13E11 | Talampicillin hydrochloride             | Antibacterial                                 | Transpeptidase inhibitor (bacterial)                 |   |     |   | + | + |   |
| Plate14G06 | Verteporfin                             | Treatment of age-related macular degeneration | Treatment of age-related macular degeneration        |   | +   | - | - |   |   |
| Plate06E06 | Cyclobenzaprine hydrochloride           | Muscle relaxant                               | Tricyclic antidepressant                             |   |     |   |   |   | - |
| Plate01B08 | Levodopa                                | Antiparkinsonian                              | Tyrosine aminotransferase inhibitor                  |   | +   |   |   |   |   |
| Plate11H10 | Capsaicin                               | Topical analgesic                             | Vanilloid receptor ligand                            |   | -   |   |   |   |   |
| Plate12B07 | N-Acetyl-L-leucine                      | Vertigo                                       | Vertigo                                              |   |     |   | - |   |   |
| Plate06A08 | Adamantamine fumarate                   | Antiviral                                     | Viral assembly inhibition (and uncoating inhibition) | + |     |   |   |   |   |
| Plate14F11 | Vitamin K2                              | Dietary factor for controlling blood pressure | Vitamin                                              | - |     |   |   |   |   |
| Plate06C10 | Cholecalciferol                         | Vitamin                                       | Vitamin                                              |   | +   |   |   |   |   |
| Plate06D04 | Cyanocobalamin                          | Vitamin                                       | Vitamin                                              |   |     |   | - |   |   |
| Plate08G04 | Pyridoxine hydrochloride                | Vitamin                                       | Vitamin                                              |   | -   |   |   |   |   |
| Plate13E08 | Fursultiamine Hydrochloride             | Vitamin (enzyme cofactor)                     | Vitamin                                              |   |     |   |   | - |   |
| Plate07E11 | Trolox                                  | Vitamin E analog                              | Vitamin                                              | - |     |   |   |   |   |
| Plate07F09 | Phenindione                             | Anticoagulant                                 | Vitamin K inhibition                                 |   | +   |   |   |   |   |
| Plate09F08 | 3-alpha-Hydroxy-5-beta-androstan-17-one |                                               |                                                      |   |     |   |   | + |   |
| Plate13A08 | 6-Hydroxytryptopine                     |                                               |                                                      | + |     |   | + | - |   |
| Plate14D02 | Imidurea                                |                                               |                                                      |   |     |   | + | + |   |
| Plate14D08 | Tropine                                 |                                               |                                                      |   |     |   | + |   |   |
| Plate14D11 | Methiazole                              |                                               |                                                      | + | +   |   | + |   |   |
| Plate14E05 | Leucomisine                             |                                               |                                                      |   |     |   | + |   |   |

Supplementary Table 4

| Compound   | Chemical name                          | Therapeutic group                                | Mechanism/class                                     | Hit PC3 6h | Hit PC3 36h | Hit HCT116 6h | Hit HCT116 36h | Hit H1299 6h | Hit H1299 36h |
|------------|----------------------------------------|--------------------------------------------------|-----------------------------------------------------|------------|-------------|---------------|----------------|--------------|---------------|
| Plate08C11 | Yohimbic acid monohydrate              | -                                                | -                                                   | +          | +           |               |                |              |               |
| Plate09A09 | Betonidine                             | -                                                | -                                                   |            |             | -             |                |              |               |
| Plate07A02 | Serotonin hydrochloride                | Neurotransmitter                                 | 5HT agonist                                         |            |             | -             |                |              |               |
| Plate02B10 | Mianserine hydrochloride               | Antidepressant                                   | 5HT antagonist                                      |            | -           |               |                |              |               |
| Plate06F05 | Lysergol                               | Antipsychotic                                    | 5HT antagonist                                      |            | +           |               | +              |              |               |
| Plate06G02 | Tropisetron HCl                        | Antiemetic                                       | 5HT antagonist (5HT3)                               |            |             | -             |                |              |               |
| Plate09C09 | Skimmianine                            | Sedative                                         | 5HT ligand                                          |            |             | -             |                |              |               |
| Plate01H03 | Imipramine hydrochloride               | Antidepressant                                   | 5HT transport inhibitor                             |            |             | +             |                |              |               |
| Plate02B03 | Zimelidine dihydrochloride monohydrate | Antidepressant                                   | 5HT uptake inhibitor                                |            | -           |               |                |              |               |
| Plate07D02 | Fluoxetine hydrochloride               | Antidepressant                                   | 5HT uptake inhibitor                                |            | -           |               |                |              |               |
| Plate11F02 | Paroxetine Hydrochloride               | Antidepressant                                   | 5HT uptake inhibitor                                |            | -           |               |                |              |               |
| Plate13F05 | Sertraline                             | Antidepressant                                   | 5HT uptake inhibitor                                |            | -           |               | -              |              |               |
| Plate06B03 | Anisomycin                             | Antiprotozoal                                    | Acetylcholine esterase inhibitor                    |            | -           |               |                |              | -             |
| Plate14E03 | (-)-Eseroline fumarate salt            | Potent analgesic                                 | Acetylcholine esterase inhibitor                    |            | -           |               |                |              |               |
| Plate10E09 | Vidarabine                             | Antiviral                                        | Adenosine antimetabolite                            | +          | +           |               |                |              |               |
| Plate01D05 | Triamterene                            | Diuretic                                         | Aldosterone antagonist (non competitive)            |            | +           |               |                |              |               |
| Plate09D09 | Ricinine                               |                                                  | Alkaloid                                            |            |             | -             |                |              |               |
| Plate08E05 | Piperlongumine                         | Antifungal                                       | Alkaloid                                            |            | -           |               | +/-            |              | -             |
| Plate08E08 | Eburnamonine (-)                       | Cerebral vasodilator                             | Alkaloid                                            |            | +/-         |               | -              |              | -             |
| Plate14E09 | (+,-)-Synephrine                       | Adrenergic                                       | Alpha adrenergic agonist                            |            |             |               |                | +            |               |
| Plate03D08 | Metaraminol bitartrate                 | Vasoconstrictor                                  | alpha Adrenergic agonist                            |            |             |               |                | +            |               |
| Plate02G08 | Nicergoline                            | Vasodilator                                      | Alpha adrenergic agonist                            | -          |             |               |                |              |               |
| Plate13F08 | Etilefrine hydrochloride               | Antihypertensive                                 | Alpha Adrenergic agonist (alpha1)                   |            |             |               |                | +            |               |
| Plate13H09 | Methyldopate hydrochloride             | Antihypertensor                                  | Alpha Adrenergic agonist (alpha2)                   |            | -           |               |                |              |               |
| Plate10B10 | Levonordefrin                          | Vasoconstrictor                                  | Alpha Adrenergic agonist (alpha2)                   |            | +/-         |               |                | +            |               |
| Plate10D02 | Terazosin hydrochloride                | Antihypertensor                                  | Alpha adrenergic antagonist                         |            | -           |               |                |              |               |
| Plate01H05 | Amityptiline hydrochloride             | Antidiabetic                                     | Alpha Adrenergic antagonist (alpha1)                |            |             | +             |                |              |               |
| Plate12G08 | Prazosin hydrochloride                 | Antihypertensor                                  | Alpha Adrenergic antagonist (alpha1)                |            | +           |               |                |              |               |
| Plate09F09 | Tetrahydrozoline hydrochloride         | Vasoconstrictor                                  | Alpha adrenergic ligand                             |            |             | -             |                |              |               |
| Plate08H03 | Dipivefrin hydrochloride               | Adrenergic (ophthalmic)                          | alpha beta Agrenergic agonist                       |            |             |               |                | +            |               |
| Plate12F09 | Benserazide hydrochloride              | In combination with levodopa as antiparkinsonian | amino acid decarboxylase inhibitor (L-aromatic a.a) |            | -           |               |                |              |               |
| Plate04F04 | Glafenine hydrochloride                | Analgesic                                        | Analgesic                                           |            |             |               |                | +            |               |
| Plate01B10 | Captopril                              | Antihypertensor                                  | Angiotensive converting enzyme inhibitor            |            |             | -             |                |              |               |
| Plate10G08 | Merbromin                              | Antibacterial                                    | Antibacterial                                       |            |             | +             |                |              |               |
| Plate13A11 | Roxarsone                              | Antibacterial                                    | Antibacterial                                       | -          |             |               |                |              |               |
| Plate09A03 | Epicatechin(-)                         | Antidiarrhoeic                                   | Antidiarrhoeic                                      | -          |             |               |                |              |               |
| Plate14G11 | Parabendazole                          | Anthelmintic (VET)                               | Anthelmintic                                        |            | +/-         |               | -              |              | +/-           |
| Plate13H11 | Pyrvinium pamoate                      | Anthelmintic (Nematodes, enterobiasis)           | Anthelmintic                                        | -          | -           |               |                |              |               |
| Plate10A02 | Althiazide                             | Antihypertensor                                  | Antihypertensor                                     | -          | -           | +             |                |              |               |
| Plate13H02 | Halofantrine hydrochloride             | Antimalarial                                     | Antimalarial                                        |            | -           | +             | +              |              |               |
| Plate07B05 | Propylthiouracil                       | Antihyperthyroid                                 | Antimetabolite                                      |            |             |               | +              |              |               |
| Plate11G07 | Azacytidine-5                          | Antineoplastic                                   | Antimetabolite                                      | -          |             |               |                |              |               |
| Plate06H11 | Puromycin dihydrochloride              | Antiprotozoal                                    | Antimetabolite                                      |            | -           |               | -              |              | -             |

|            |                                       |                     |                                                                  |  |     |   |   |   |   |
|------------|---------------------------------------|---------------------|------------------------------------------------------------------|--|-----|---|---|---|---|
| Plate10E06 | Ethoxyquin                            | Antifungal          | Antioxydant                                                      |  | -   |   |   |   |   |
| Plate09G11 | Strophanthidin                        | Cardiotonic         | ATPase inhibitor                                                 |  |     |   |   | + | + |
| Plate08G02 | Methoxy-6-harmalan                    | Psoriasis treatment | Benzodiazepine receptor ligand                                   |  |     |   |   | + |   |
| Plate03D09 | Salbutamol                            | Bronchodilatator    | Beta adrenergic agonist                                          |  |     |   |   | + |   |
| Plate04E03 | Fenoterol hydrobromide                | Bronchodilatator    | Beta adrenergic agonist                                          |  |     |   |   | + |   |
| Plate05C06 | Clenbuterol hydrochloride             | Bronchodilatator    | Beta adrenergic agonist                                          |  |     |   |   | + |   |
| Plate10C10 | Isoetharine mesylate salt             | Bronchodilatator    | Beta adrenergic agonist                                          |  |     |   |   | + |   |
| Plate14F08 | (-)-Isoproterenol hydrochloride       | Bronchodilatator    | Beta adrenergic agonist                                          |  |     |   |   | + |   |
| Plate05D03 | Dobutamine hydrochloride              | Bronchodilatator    | Beta adrenergic agonist (beta1)                                  |  |     |   |   | + |   |
| Plate05E02 | Bambuterol hydrochloride              | Bronchodilatator    | Beta adrenergic agonist (beta2)                                  |  | -   |   |   |   |   |
| Plate05H02 | Terbutaline hemisulfate               | Bronchodilatator    | Beta adrenergic agonist (beta2)                                  |  | -   |   |   | + |   |
| Plate12G06 | Salmeterol                            | Bronchodilatator    | Beta adrenergic agonist (beta2)                                  |  |     |   |   | + |   |
| Plate05C10 | Ritodrine hydrochloride               | Tocolytic           | Beta adrenergic agonist (beta2)                                  |  |     |   |   | + |   |
| Plate12G10 | (+,-)-Octopamine hydrochloride        | Adrenergic          | Beta adrenergic agonist (beta3)                                  |  |     |   |   | + |   |
| Plate14A04 | Penbutolol sulfate                    | Antihypertensor     | Beta adrenergic antagonist                                       |  | -   |   |   |   |   |
| Plate04A11 | Alprenolol hydrochloride              | Antihypertensor     | Beta adrenergic antagonist (beta1)                               |  | -   |   |   |   |   |
| Plate04D08 | Labetalol hydrochloride               | Antihypertensor     | Beta adrenergic antagonist (beta1)                               |  |     |   |   | + |   |
| Plate03A10 | Hydralazine hydrochloride             | Antihypertensor     | Beta adrenergic antagonist (could be, not shown)                 |  | -   |   |   |   |   |
| Plate07F07 | (S)-(-)-Atenolol                      | Antihypertensor     | beta adrenergic blocker                                          |  |     |   |   | + |   |
| Plate14B08 | Oxprenolol hydrochloride              | Antihypertensor     | Beta adrenergic blocker                                          |  | +/- |   |   |   |   |
| Plate03F04 | Fenspiride hydrochloride              | Antiinflammatory    | Bradykinin antagonist                                            |  |     |   |   | + |   |
| Plate12D02 | (+)-Isoproterenol (+)-bitartrate salt | Bronchodilatator    | Bronchodilatator                                                 |  | -   | + |   | + |   |
| Plate08H11 | Solanine alpha                        | Antifungal          | Butyrylcholinesterase inhibitor                                  |  | -   |   |   |   |   |
| Plate02G05 | Loperamide hydrochloride              | Antidiarrhoeic      | Ca2+ channel antagonist                                          |  |     |   |   |   | - |
| Plate05E09 | Bepidil hydrochloride                 | Antianginal         | Ca2+ channel blocker                                             |  | -   |   |   |   |   |
| Plate04E07 | Perhexiline maleate                   | Vasodilatator       | Ca2+ channel blocker                                             |  | -   | - |   | - | + |
| Plate06H09 | Felodipine                            | Antihypertensor     | Ca2+ channel blocker (L-Type)                                    |  | -   |   |   |   |   |
| Plate11C10 | Dimethadione                          | Anticonvulsant      | 'Ca2+ channel inhibitor voltage dependant                        |  | -   |   |   |   |   |
| Plate04C11 | Fendiline hydrochloride               | Antianginal         | Ca2+ channel stimulation                                         |  | -   |   |   |   |   |
| Plate07H11 | Prenylamine lactate                   | Vasodilatator       | Ca2+ channel stimulation                                         |  | -   |   | - |   | + |
| Plate14C06 | Milrinone                             | Cardiotonic         | cAMP/PKA                                                         |  | -   |   |   |   |   |
| Plate01A04 | Acetazolamide                         | Diuretic            | Carbonic anhydrase inhibitor                                     |  |     | + |   |   |   |
| Plate11A10 | Dichlorphenamide                      |                     | Carbonic anhydrase inhibitor                                     |  | -   |   |   |   |   |
| Plate13C07 | Proscillaridin A                      | Cardiotonic         | Cardiac glycoside                                                |  |     |   |   | + | + |
| Plate05F03 | Debrisoquin sulfate                   | Antihypertensor     | Catecholamine depletor                                           |  |     |   | + | + |   |
| Plate07G02 | Ciclopirox ethanolamine               | Antifungal          | Cell membrane proteins synthesis inhibitor                       |  |     |   | + |   | + |
| Plate14H09 | Cefepime hydrochloride                | Antibacterial       | Cell wall destruction agent                                      |  |     |   |   | + |   |
| Plate09D03 | (d,l)-Tetrahydroberberine             | Sedative            | Cell wall synthesis inhibitor                                    |  | -   |   |   |   |   |
| Plate06G11 | Ceforanide                            | Antibacterial       | Cell wall synthesis inhibitor (bacterial)                        |  |     |   | + |   |   |
| Plate14D09 | Benzylpenicillin sodium               | Antibacterial       | Cell wall synthesis inhibitor (bacterial)                        |  |     |   |   | + |   |
| Plate10A06 | Deferoxamine mesylate                 |                     | chelating agent                                                  |  |     |   | + |   | + |
| Plate12A07 | Clioquinol                            | Anti-infective      | Chelating agent, chymotrypsin-like proteasome activity inhibitor |  | -   |   |   |   |   |
| Plate02E04 | Dehydrocholic acid                    | Choleretic          | Choleretic                                                       |  | +   |   |   |   |   |

|            |                                            |                          |                                                                                                 |     |     |     |   |     |     |
|------------|--------------------------------------------|--------------------------|-------------------------------------------------------------------------------------------------|-----|-----|-----|---|-----|-----|
| Plate05G05 | Probucol                                   | Antihyperlipoproteinemic | Cholesterol downregulation                                                                      |     |     |     | - |     |     |
| Plate03E03 | Tiratricol, 3,3',5-triiodothyroacetic acid | Hypocholesterolemic drug | Cholesterol downregulation                                                                      |     |     |     |   | +   | +   |
| Plate02A04 | Edrophonium chloride                       | Myasthenia Gravis test   | Cholinergic                                                                                     |     |     |     |   |     | +   |
| Plate01F03 | Carbamazepine                              | Anticonvulsivant         | Cholinergic antagonist                                                                          |     |     | +   |   |     |     |
| Plate01H06 | Adiphenine hydrochloride                   | Local anesthetic         | cholinergic inhibition                                                                          |     |     |     | + |     |     |
| Plate10H05 | Eucatropine hydrochloride                  |                          | cholinergic inhibition                                                                          |     |     |     | + |     |     |
| Plate02A03 | Cotinine (-)                               | Antidepressant           | cholinergic inhibition (and nicotinic inhibition)                                               |     |     |     |   |     | +   |
| Plate02C08 | Tomatine                                   | Antifungal               | Cholinergic inhibition (pH-dependent competitive inhibition of the enzyme acetylcholinesterase) | -   | -   | -   | - |     |     |
| Plate10C02 | Nadide                                     | -                        | CoA nicotinamide adenine dinucleotide                                                           |     |     |     | - |     |     |
| Plate07D07 | Lovastatin                                 | Antihypercholesterolemic | CoA reductase inhibitor (HMG CoA)                                                               |     |     |     | - |     |     |
| Plate13A10 | 3-Acetamidocoumarin                        | Antiinflammatory         | coumarin                                                                                        | -   |     |     |   |     |     |
| Plate03E04 | Flufenamic acid                            | Analgesic                | cyclooxygenase inhibition                                                                       |     |     |     |   |     | +   |
| Plate01D10 | Diflunisal                                 | Antiinflammatory         | cyclooxygenase inhibition                                                                       |     |     |     | - |     |     |
| Plate02B09 | Acetylsalicylsalicylic acid                | Antiinflammatory         | cyclooxygenase inhibition                                                                       |     |     | -   |   |     |     |
| Plate07C09 | Resveratrol                                | Antiinflammatory         | cyclooxygenase inhibition                                                                       |     |     |     |   | -   |     |
| Plate10B11 | Ebselen                                    | Antiinflammatory         | cyclooxygenase inhibition                                                                       | -   | -   |     |   |     |     |
| Plate10H02 | (R) -Naproxen sodium salt                  | Antiinflammatory         | cyclooxygenase inhibition                                                                       |     |     | -   |   |     | +   |
| Plate11B07 | Suprofen                                   | Antiinflammatory         | cyclooxygenase inhibition                                                                       | -   |     |     |   |     |     |
| Plate11F07 | Tolmetin sodium salt dihydrate             | Antiinflammatory         | cyclooxygenase inhibition                                                                       | -   |     |     |   |     |     |
| Plate13E04 | Azapropazone                               | Anti-inflammatory        | cyclooxygenase inhibition                                                                       |     |     | -   |   |     |     |
| Plate14A10 | Oxyphenbutazone                            | Anti-inflammatory        | cyclooxygenase inhibition                                                                       | -   | -   | -   | - |     | -   |
| Plate09G06 | Methyl benzethonium chloride               | Antibacterial            | Detergent                                                                                       | -   |     |     |   |     |     |
| Plate09G09 | Benzethonium chloride                      | Antibacterial            | Detergent                                                                                       |     |     |     | - |     | +   |
| Plate10F08 | Alexidine dihydrochloride                  | Antibacterial            | Detergent                                                                                       | -   | -   | -   | - | +/- | -   |
| Plate10H03 | Propidium iodide                           | Antibacterial            | Detergent                                                                                       |     |     |     |   |     | +   |
| Plate02G04 | Chlorhexidine                              | Bacteriostatic           | Detergent                                                                                       |     |     | -   |   |     | +   |
| Plate12E06 | Thonzonium bromide                         |                          | Detergent                                                                                       |     |     | -   |   |     |     |
| Plate02A02 | Metronidazole                              | Antibacterial            | DNA damage (bacterial)                                                                          |     |     |     |   |     | +   |
| Plate07B03 | Nitrofurantoin                             | Antibacterial            | DNA damage (bacterial)                                                                          |     |     |     | - |     |     |
| Plate07H06 | Nifuroxazide                               | Antibacterial            | DNA damage (bacterial)                                                                          |     |     |     |   |     | +   |
| Plate02A05 | Moroxydine hydrochloride                   | Antiviral                | DNA damage (viral DNA RNA)                                                                      |     |     |     |   |     | -   |
| Plate05D06 | Hycanthone                                 | Anthelmintic             | DNA intercalating agent                                                                         |     |     | +   |   |     |     |
| Plate06D09 | Doxorubicin hydrochloride                  | Antibacterial            | DNA intercalating agent                                                                         |     |     | +   |   | +   | +   |
| Plate08F05 | Ellipticine                                | Anticancer               | DNA Intercalating agent                                                                         | +   | +   |     |   | +   | +   |
| Plate07A08 | Daunorubicin hydrochloride                 | Antineoplastic           | DNA intercalating agent                                                                         |     |     | +/- |   |     | -   |
| Plate14B07 | Trifluridine                               | Antiviral (ophthalmic)   | DNA replication inhibitor (viral)                                                               | +/- | +/- |     |   | +   | +   |
| Plate07F05 | Atovaquone                                 | Antipneumocystic         | DNA synthesis inhibitor (antiprotozoa)                                                          |     |     | +   |   |     |     |
| Plate13B11 | Piribedil hydrochloride                    | Vasodilator (peripheral) | Dopamine agonist                                                                                | -   |     |     |   |     |     |
| Plate02C02 | R(-) Apomorphine hydrochloride hemihydrate | Emetic                   | Dopamine agonist (D1)                                                                           |     |     | +/- |   |     |     |
| Plate06F02 | Alizapride HCl                             | Antiemetic               | Dopamine antagonist                                                                             |     |     | +/- |   |     |     |
| Plate08E02 | Scoulerine                                 | Antiemetic               | Dopamine antagonist                                                                             |     |     | +/- |   | -   | +/- |
| Plate02F03 | Loxapine succinate                         | Anxiolytic               | Dopamine antagonist                                                                             |     |     | -   |   |     |     |

|            |                                 |                     |                                          |   |     |   |  |     |   |     |
|------------|---------------------------------|---------------------|------------------------------------------|---|-----|---|--|-----|---|-----|
| Plate01F04 | Triflupromazine hydrochloride   | Antipsychotic       | Dopamine antagonist ?                    |   | -   |   |  |     |   | +   |
| Plate01F07 | Sulpiride                       | Antipsychotic       | Dopamine antagonist (D2)                 |   | +   |   |  |     |   |     |
| Plate02B08 | Disulfiram                      | Alcohol deterrent   | Dopamine beta hydroxylase inhibitor      |   | +/- |   |  |     |   | -   |
| Plate13D09 | Zuclopenthixol hydrochloride    | Antipsychotic       | dopamine receptor blocker                |   | +   |   |  |     |   |     |
| Plate13H06 | Molindone hydrochloride         | Antipsychotic       | Dopamine receptor ligand                 |   | -   |   |  |     |   |     |
| Plate05G07 | GBR 12909 dihydrochloride       | Antidepressant      | Dopamine uptake inhibitor                | + |     |   |  |     |   |     |
| Plate03G07 | Griseofulvin                    | Antifungal          | Enzymatic inductor                       |   |     |   |  | -   |   |     |
| Plate11A11 | Sulconazole nitrate             | Antifungal          | Ergosterol synthesis inhibition          | - |     |   |  | -   |   |     |
| Plate11G11 | Luteolin                        | Expectorant         | Flavonoid                                |   | +   |   |  | +   |   |     |
| Plate03E09 | Trimethoprim                    | Antibacterial       | Folic acid antagonist                    |   |     |   |  |     | + |     |
| Plate01D08 | Pyrimethamine                   | Antiprotozoal       | Folic acid antagonist                    |   | +/- |   |  | +   |   | -   |
| Plate10B02 | Sulfaquinoxaline sodium salt    | Antibacterial       | Folic acid synthesis inhibition          |   | -   |   |  |     |   |     |
| Plate08A10 | Dihydroergotomine mesylate      | Anticonvulsant      | GABA A receptor Cl-channel high affinity |   | -   |   |  |     |   |     |
| Plate07F10 | Thiocolchicoside                | Muscle relaxant     | GABA agonist ?                           |   |     |   |  | +   |   |     |
| Plate11E02 | Securinine                      | CNS stimulant       | GABA antagonist                          |   |     |   |  |     |   | +   |
| Plate09C03 | Gelsemine                       | Tumour inhibitor    | GABA antagonist                          | - |     |   |  |     |   |     |
| Plate09B03 | Picrotoxinin                    | Analeptic           | GABA channel blocker                     | - |     |   |  |     |   |     |
| Plate09B11 | Avermectin B1                   | Anthelmintic        | GABA receptors ligand                    |   |     |   |  |     | + |     |
| Plate05A04 | Chlorpropamide                  | Antidiabetic        | Glucagon secretogen                      |   |     |   |  | +   |   |     |
| Plate02D11 | Triamcinolone                   | Antiinflammatory    | glucocorticoid                           |   | +   |   |  |     |   |     |
| Plate07D09 | Budesonide                      | Antiinflammatory    | Glucocorticoid                           | + |     |   |  | +   |   |     |
| Plate01H08 | Prednisone                      | Glucocorticoid      | Glucocorticoid                           |   | -   |   |  |     |   |     |
| Plate04D10 | Methylprednisolone, 6-alpha     | Glucocorticoid      | Glucocorticoid                           |   |     |   |  | +   | + |     |
| Plate05E03 | Betamethasone                   | Glucocorticoid      | Glucocorticoid                           | + |     |   |  |     |   |     |
| Plate09A04 | Flunisolide                     | Glucocorticoid      | Glucocorticoid                           |   |     |   |  | +   |   |     |
| Plate09A06 | Flurandrenolide                 | Glucocorticoid      | Glucocorticoid                           |   |     |   |  | +   |   |     |
| Plate09H09 | Fluorometholone                 | Glucocorticoid      | Glucocorticoid                           |   |     |   |  | -   |   |     |
| Plate10B05 | Flumethasone                    | Glucocorticoid      | Glucocorticoid                           |   |     |   |  | +   |   |     |
| Plate10F05 | Fluocinonide                    | Glucocorticoid      | Glucocorticoid                           |   |     |   |  |     |   | +   |
| Plate10G02 | Clobetasol propionate           | Glucocorticoid      | Glucocorticoid                           |   | -   |   |  | +   |   |     |
| Plate14H10 | Clocortolone pivalate           | Glucocorticoid      | Glucocorticoid                           | + |     |   |  | +   |   |     |
| Plate08B03 | Mometasone furoate              | Antiinflammatory    | glucocorticoid receptor agonist          |   |     |   |  | +   |   |     |
| Plate10F02 | Alclometasone dipropionate      | Anti-inflammatory   | glucocorticoid receptor agonist          |   | -   |   |  |     |   |     |
| Plate05E08 | Benfluorex hydrochloride        | Hypolipemic         | Glucose transport enhancer               | - |     |   |  |     |   |     |
| Plate03F08 | Mebendazole                     | Parasite suppressor | Glucose transport inhibitor ?            |   | +   |   |  | +/- |   | +/- |
| Plate02E07 | Mefloquine hydrochloride        | Antimalarial        | Heme polymerase inhibitor                |   | -   | - |  |     |   |     |
| Plate06H07 | Primaquine diphosphate          | Antimalarial        | Heme polymerase inhibitor                |   | -   |   |  |     |   | +/- |
| Plate10H08 | Methotrimeprazine maleate salt  | Analgesic           | Histamine antagonist                     |   |     |   |  | +   |   |     |
| Plate09G07 | Chlorcyclizine hydrochloride    | Antihistaminic      | Histamine antagonist                     |   |     |   |  |     | + |     |
| Plate10H04 | Cloperastine hydrochloride      | Antitussive         | Histamine antagonist                     |   | -   |   |  |     |   |     |
| Plate02F07 | Astemizole                      | Antihistaminic      | Histamine antagonist (H1)                |   | -   |   |  |     |   |     |
| Plate11A08 | Chloropyramine hydrochloride    | Antihistaminic      | Histamine antagonist (H1)                |   |     |   |  | +   |   |     |
| Plate13H10 | Levocabastine hydrochloride     | Antihistaminic      | Histamine antagonist (H1)                | - |     |   |  |     |   |     |
| Plate03E02 | Ranitidine hydrochloride        | Antiulcerative      | Histamine antagonist (H2)                |   |     |   |  | -   |   |     |
| Plate06C09 | Roxatidine Acetate HCl          | Antiulcerative      | Histamine antagonist (H2)                |   | -   |   |  |     |   | -   |
| Plate09E09 | Estropipate                     | Estrogen            | Hormone estrogen                         |   |     |   |  | -   |   |     |
| Plate10D07 | Diethylstilbestrol              | Estrogen            | Hormone estrogen                         |   | +   |   |  | -   |   |     |
| Plate11E07 | Ethinylestradiol 3-methyl ether | Estrogen            | Hormone estrogen                         | - |     |   |  |     |   |     |

|            |                                      |                                              |                                                  |   |     |   |     |   |     |
|------------|--------------------------------------|----------------------------------------------|--------------------------------------------------|---|-----|---|-----|---|-----|
| Plate05H08 | Clomiphene citrate (Z,E)             | Antineoplastic                               | hormone Estrogen agonist                         |   | -   |   |     |   |     |
| Plate02C06 | Danazol                              | Antigonadotropin                             | hormone Estrogen antagonist                      |   | +/- |   | -   |   | -   |
| Plate07H07 | Mycophenolic acid                    | Antineoplastic                               | Inosine monophosphate dehydrogenase inhibitor    |   | +/- |   |     |   | +   |
| Plate02E03 | Metanephrine hydrochloride DL        |                                              | Isoprenaline uptake inhibitor extraneuronal      |   | -   | + |     |   |     |
| Plate07H05 | Tolazamide                           | Antidiabetic                                 | K+ channel blocker (ATP-dependent channels)      |   |     |   |     | + |     |
| Plate01F06 | Acetohexamide                        | Antidiabetic (type II, noninsulin-dependent) | K+ channel blocker (ATP-dependent channels)      |   | +   |   |     |   |     |
| Plate02F02 | Glipizide                            | Hypoglycemic                                 | K+ channel blocker (ATP-dependent channels)      |   |     | - |     |   |     |
| Plate03C11 | Tolbutamide                          | Hypoglycemic                                 | K+ channel blocker (ATP-dependent channels)      | + |     |   | +   |   | +   |
| Plate04E05 | Diethylcarbamazine citrate           | Anthelmintic                                 | Lipoxygenase inhibitor                           |   |     |   |     | + |     |
| Plate07C08 | Quercetine dihydrate                 | Antimalarial                                 | Lipoxygenase inhibitor                           |   |     |   | -   |   |     |
| Plate08F03 | Harmol hydrochloride monohydrate     | Anxiolytic                                   | Liver conjugation probe                          |   |     |   |     | + |     |
| Plate11H07 | Arcaine sulfate                      |                                              | Lowers blood sugar                               | - |     | + |     |   |     |
| Plate12A04 | Digoxigenin                          | Diagnosis                                    | Mainly used as a non-isotopic label for DNA      |   |     |   | -   | + | +   |
| Plate03A11 | Phenelzine sulfate                   | Antidepressant                               | MAO inhibitor                                    | - |     |   |     |   |     |
| Plate03B04 | Tranylcypromine hydrochloride        | Antidepressant                               | MAO inhibitor                                    |   |     | - |     |   |     |
| Plate08F04 | Harmine hydrochloride                | Anthelmintic                                 | MAO inhibitor                                    |   | +   |   |     |   |     |
| Plate04H09 | Quinacrine dihydrochloride dihydrate | Antimalarial                                 | MAO inhibitor                                    |   |     |   |     |   | +   |
| Plate07G11 | Parthenolide                         | Antiinflammatory                             | MAPK inhibitor                                   |   | -   | + | -   |   | +   |
| Plate06B05 | Apigenin                             | Antiproliferative                            | MAPK inhibitor                                   |   | +   |   |     | + |     |
| Plate12D03 | Monobenzone                          | Depigmentor                                  | melanin inhibition                               |   | -   |   | +   |   | +   |
| Plate09A07 | Helveticoside                        | Cardiotonic                                  | membrane ATP inhibitor                           |   |     |   |     | + | -   |
| Plate10C09 | Monensin sodium salt                 | Antibacterial                                | Membrane ionophores producer                     |   |     |   | -   |   |     |
| Plate03E11 | Fenbendazole                         | Anthelmintic                                 | microtubule polymerisation inhibitor             |   | +   |   | +/- |   | -   |
| Plate05E04 | Colchicine                           | Antiinflammatory                             | microtubule polymerisation inhibitor             |   | +/- |   | -   |   | -   |
| Plate02B11 | Nocodazole                           | Antineoplastic                               | microtubule polymerisation inhibitor             |   | +/- |   | +/- |   | -   |
| Plate02H06 | Paclitaxel                           | Antineoplastic                               | microtubule polymerisation inhibitor             |   | +/- |   | -   | - | +/- |
| Plate04A08 | Albendazole                          |                                              | microtubule polymerization inhibition            |   | +/- |   | +/- |   | +/- |
| Plate10G03 | Podophyllotoxin                      | Antiviral                                    | Microtubule polymerization inhibitor             | - | -   |   | +/- |   | +/- |
| Plate03G03 | Antimycin A                          | Antifungal                                   | Mitochondrial electron transport inhibitor       |   |     | - | +   |   | +   |
| Plate09D07 | Beta-Escin                           | Peripheral vascular disorders                | Momoamine transport inhibition                   |   | -   |   |     |   |     |
| Plate14B06 | Piperidolate hydrochloride           | Antispasmodic                                | Muscarinic blocking agent                        |   | +   |   |     |   |     |
| Plate09H03 | Benzocaine                           | Anesthetic                                   | Na+ channel blocker                              | - |     |   |     |   |     |
| Plate10E02 | Butamben                             | Anesthetic                                   | Na+ channel blocker                              |   | -   |   |     |   |     |
| Plate01E10 | Amyleine hydrochloride               | Local Anesthetic                             | Na+ channel blocker                              |   |     | - |     |   |     |
| Plate03D10 | Prilocaine hydrochloride             | Local anesthetic                             | Na+ channel blocker                              |   | +   |   |     |   | +   |
| Plate04D06 | Fenofibrate                          | Hypolipidemiant                              | <b>Na+ channel inhibitor (voltage-dependent)</b> |   |     |   |     | + |     |
| Plate10G05 | Bendroflumethiazide                  | Antihypertensor                              | Na+ Cl- transport inhibitor                      |   |     | - |     |   |     |
| Plate03F11 | Indapamide                           | Antihypertensor                              | Na+ Cl- uptake inhibitor                         |   | +/- |   |     |   |     |



|            |                                     |                                               |                                                      |   |     |   |     |   |     |
|------------|-------------------------------------|-----------------------------------------------|------------------------------------------------------|---|-----|---|-----|---|-----|
| Plate02D03 | Metolazone                          | Diuretic                                      | Na+ Cl- uptake inhibitor                             |   | -   |   |     |   |     |
| Plate14A11 | Quinethazone                        | Diuretic                                      | Na+ Cl- uptake inhibitor                             | - |     |   |     |   |     |
| Plate13C08 | Sanguinarine                        | Antimicrobial drug                            | Na+ K+ ATPase inhibitor                              |   | +   |   |     |   |     |
| Plate06D07 | Digitoxigenin                       | Cardiotonic                                   | Na+ K+ ATPase inhibitor                              |   |     |   | +   | + |     |
| Plate06D08 | Digoxin                             | Cardiotonic                                   | Na+ K+ ATPase inhibitor                              |   |     |   | +   |   |     |
| Plate06H02 | Strophantine octahydrate            | Cardiotonic                                   | Na+ K+ ATPase inhibitor                              |   |     |   | +   | + |     |
| Plate09B07 | Lanatoside C                        | Cardiotonic                                   | Na+ K+ ATPase inhibitor                              | - |     |   | +   | + |     |
| Plate13A09 | Decamethonium bromide               | Muscle relaxant (skeletal)                    | Neuromuscular depolarizing agent                     | - |     |   |     |   |     |
| Plate09E03 | beta- Belladonnine dichloroethylate | Muscle relaxant                               | Nicotinic receptor ligand                            | - |     |   |     |   |     |
| Plate11A07 | Trimipramine maleate salt           | Antidepressant                                | Noradrenaline uptake inhibitor                       | - |     |   |     |   |     |
| Plate09B09 | Suxibuzone                          | Antiinflammatory                              | NSAI                                                 |   |     | - |     |   |     |
| Plate11C07 | Oxalamine citrate salt              | Antiinflammatory                              | NSAI                                                 | - |     |   |     |   |     |
| Plate10H09 | Dienestrol                          | Non-steroidal estrogen                        | Nuclear receptor ligand                              |   | -   |   | -   |   | -   |
| Plate01B09 | Idoxuridine                         | Antiviral                                     | Nucleic acid synthesis inhibitors                    |   | +   |   |     |   |     |
| Plate13G06 | Letrozole                           | Antineoplastic                                | P450 inhibitor                                       |   |     |   |     | + |     |
| Plate02E05 | Hesperetin                          |                                               | P450 inhibitor                                       |   | +/- |   |     |   |     |
| Plate10F09 | Proadifen hydrochloride             | Local anesthetic                              | P450 inhibitor (mono-oxygenases)                     | - | -   |   |     |   |     |
| Plate04A03 | Flavoxate hydrochloride             | Antispasmodic                                 | Phosphodiesterase inhibitor                          |   |     |   | +   |   |     |
| Plate08C08 | Cilostazol                          | Antithrombotic                                | Phosphodiesterase inhibitor                          |   | +/- |   | -   |   | +/- |
| Plate13F09 | Alprostadil                         | Vasodilator                                   | Prostaglandine E1 receptor ligand                    | - |     |   |     |   |     |
| Plate14H05 | Saquinavir mesylate                 | Antiviral (HIV)                               | Protease inhibitor                                   |   |     |   | -   |   |     |
| Plate02G07 | Tamoxifen citrate                   | Anticancer                                    | Protein kinase C inhibitor                           |   |     |   |     |   | +   |
| Plate08A11 | Emetine dihydrochloride             | Antiamebic                                    | Protein synthesis inhibitor                          |   | -   |   | -   |   | -   |
| Plate10G11 | Cycloheximide                       | Antibacterial                                 | Protein synthesis inhibitor                          |   |     |   | -   |   |     |
| Plate13A05 | Methacycline hydrochloride          | Antibacterial                                 | Protein synthesis inhibitor (bacteria)               | - |     |   |     |   |     |
| Plate02H05 | Josamycin                           | Antibacterial                                 | Ribosomal protein synthesis inhibitor                |   | -   |   |     |   |     |
| Plate05H05 | Kanamycin A sulfate                 | Antibacterial                                 | Ribosomal protein synthesis inhibitor                |   |     |   | +   |   |     |
| Plate13F10 | Tribenoside                         | Sclerosing agent                              | Sclerosing agent                                     | - | -   |   |     |   |     |
| Plate12A06 | Cantharidin                         | Rubefiant                                     | Serine protease releaser                             |   | -   |   | -   |   |     |
| Plate10G10 | Drofenine hydrochloride             | Spasmolytic                                   | Spasmolytic                                          |   |     |   | -   |   |     |
| Plate02E08 | Isoconazole                         | Antibacterial                                 | Sterol 14-demethylase inhibitor                      |   | -   |   |     |   |     |
| Plate01G08 | Miconazole                          | Antifungal                                    | Sterol 14-demethylase inhibitor                      |   | -   |   |     |   |     |
| Plate03D11 | Camptothecine (S,+)                 | Antitumor agent                               | Topoisomerase I inhibitor                            |   | +/- |   | +   |   | +   |
| Plate03E05 | Flumequine                          | Antibacterial                                 | Topoisomerase II inhibitor                           |   |     |   |     | + |     |
| Plate05G06 | Mitoxantrone dihydrochloride        | Antineoplastic                                | topoisomerase II inhibitor                           |   | -   |   | +   |   | +   |
| Plate05H07 | Etoposide                           | Antineoplastic                                | Topoisomerase II inhibitor                           | + | +   |   | +/- |   |     |
| Plate14H11 | Nadifloxacin                        | Antibacterial                                 | Topoisomerase inhibitor (topoisomerase II)           | - |     |   |     |   |     |
| Plate02D05 | Ampicillin trihydrate               | Antibacterial                                 | transpeptidase inhibitor (bacterial)                 |   | -   |   |     |   |     |
| Plate14G06 | Verteporfin                         | Treatment of age-related macular degeneration | Treatment of age-related macular degeneration        |   |     |   |     | + |     |
| Plate11H10 | Capsaicin                           | Topical analgesic                             | Vanilloid receptor ligand                            |   | +   |   |     |   |     |
| Plate06C02 | Suloctidil                          | Vasodilatator                                 | Vasodilatator                                        |   | -   |   |     |   |     |
| Plate12B07 | N-Acetyl-L-leucine                  | Vertigo                                       | Vertigo                                              |   |     |   |     | + |     |
| Plate06A08 | Adamantamine fumarate               | Antiviral                                     | Viral assembly inhibition (and uncoating inhibition) |   |     |   | +   |   |     |
| Plate08H05 | Riboflavine                         | Vitamin                                       | Vitamin                                              |   |     |   |     | + |     |
| Plate07E11 | Trolox                              | Vitamin E analog                              | Vitamin                                              |   | +   |   |     |   |     |

|            |            |            |                   |  |            |  |   |  |   |
|------------|------------|------------|-------------------|--|------------|--|---|--|---|
| Plate06F10 | Menadione  | Vitamin K3 | Vitamin precursor |  | <b>+/-</b> |  |   |  |   |
| Plate14D11 | Methiazole |            |                   |  |            |  | - |  | - |

Supplementary Table 5

| Compound   | Chemical name                          | Therapeutic group                      | Mechanism/class                          | Hit PC3 6h | Hit PC3 36h | Hit HCT116 6h | Hit HCT116 36h | Hit H1299 6h | Hit H1299 36h |
|------------|----------------------------------------|----------------------------------------|------------------------------------------|------------|-------------|---------------|----------------|--------------|---------------|
| Plate09A09 | Betonidine                             | -                                      | -                                        |            |             | -             |                |              |               |
| Plate02B10 | Mianserine hydrochloride               | Antidepressant                         | 5HT antagonist                           |            | -           |               |                |              |               |
| Plate02C04 | Cyproheptadine hydrochloride           | Antipruritic                           | 5HT antagonist                           |            | -           |               |                |              |               |
| Plate06G02 | Tropisetron HCl                        | Antiemetic                             | 5HT antagonist (5HT3)                    |            |             | -             |                |              |               |
| Plate02E11 | Dexamethasone acetate                  | Antiinflammatory                       | 5HT antagonist effect doper              |            | -           |               |                |              |               |
| Plate09C09 | Skimmianine                            | Sedative                               | 5HT ligand                               |            |             | -             |                |              |               |
| Plate01H03 | Imipramine hydrochloride               | Antidepressant                         | 5HT transport inhibitor                  |            | -           | +             |                |              |               |
| Plate02B03 | Zimelidine dihydrochloride monohydrate | Antidepressant                         | 5HT uptake inhibitor                     |            | -           |               |                |              |               |
| Plate07D02 | Fluoxetine hydrochloride               | Antidepressant                         | 5HT uptake inhibitor                     |            | +           |               |                |              |               |
| Plate11F02 | Paroxetine Hydrochloride               | Antidepressant                         | 5HT uptake inhibitor                     | +          | -           |               |                |              |               |
| Plate13F05 | Sertraline                             | Antidepressant                         | 5HT uptake inhibitor                     | +          |             |               | +              |              |               |
| Plate09F03 | Citalopram Hydrobromide                | Antidepressant                         | 5HT uptake inhibitor                     | -          |             |               |                |              |               |
| Plate06B03 | Anisomycin                             | Antiprotozoal                          | Acetylcholine esterase inhibitor         |            | +/-         | +             | +              |              | +             |
| Plate14E03 | (-)-Eseroline fumarate salt            | Potent analgesic                       | Acetylcholine esterase inhibitor         |            | -           |               |                |              |               |
| Plate02G03 | Dipyridamole                           | Platelet antiagregant                  | Adenosine metabolism inhibitor           |            | -           |               |                |              |               |
| Plate01E08 | Ticlopidine hydrochloride              | Platelet antiagregant                  | ADP antagonist                           | -          | -           |               |                |              |               |
| Plate02E09 | Spironolactone                         | Diuretic                               | Aldosterone antagonist                   |            | -           |               |                |              |               |
| Plate01D05 | Triamterene                            | Diuretic                               | Aldosterone antagonist (non competitive) |            | -           |               |                |              |               |
| Plate09D09 | Ricinine                               |                                        | Alkaloid                                 |            |             | -             |                |              |               |
| Plate08E05 | Piperlongumine                         | Antifungal                             | Alkaloid                                 | +          | +           | +             |                |              | +             |
| Plate08B05 | Dacarbazine                            | Antineoplastic                         | Alkylating agent                         |            |             | +             |                |              |               |
| Plate02B07 | Guanabenz acetate                      | Antihypertensor                        | Alpha adrenergic agonist                 |            | -           |               |                |              |               |
| Plate02G08 | Nicergoline                            | Vasodilatator                          | Alpha adrenergic agonist                 | -          | -           |               |                |              |               |
| Plate12E07 | Idazoxan hydrochloride                 | Antiparkinsonian                       | Alpha adrenergic agonist (alpha2)        |            | +           |               |                |              |               |
| Plate10B10 | Levonordefrin                          | Vasoconstrictor                        | Alpha Adrenergic agonist (alpha2)        |            |             | -             |                |              |               |
| Plate01E03 | Moxislyte hydrochloride                | Vasodilatator                          | Alpha adrenergic antagonist              |            | -           |               |                |              |               |
| Plate01F11 | Tolazoline hydrochloride               | Vasodilatator                          | Alpha adrenergic antagonist              |            | -           |               |                |              |               |
| Plate01H05 | Amitryptiline hydrochloride            | Antidiabetic                           | Alpha Adrenergic antagonist (alpha1)     |            | -           | +             |                |              |               |
| Plate09F09 | Tetrahydrozoline hydrochloride         | Vasoconstrictor                        | Alpha adrenergic ligand                  |            |             | -             |                |              |               |
| Plate01E07 | Naphazoline hydrochloride              | Vasoconstrictor                        | alpha adrenergic ligand                  |            | -           |               |                |              |               |
| Plate01B10 | Captopril                              | Antihypertensor                        | Angiotensive converting enzyme inhibitor |            |             | -             |                |              |               |
| Plate13A11 | Roxarsone                              | Antibacterial                          | Antibacterial                            | -          |             |               |                |              |               |
| Plate09A03 | Epicatechin(-)                         | Antidiarrhoeic                         | Antidiarrhoeic                           | -          |             |               |                |              |               |
| Plate14G11 | Parbendazole                           | Anthelmintic (VET)                     | Anthelmintic                             | +          | -           |               |                |              | +             |
| Plate13H11 | Pyrvinium pamoate                      | Anthelmintic (Nematodes, enterobiasis) | Anthelmintic                             | +/-        |             |               |                |              |               |
| Plate01H02 | Todralazine hydrochloride              | Antihypertensor                        | Antihypertensor                          |            | -           |               |                |              |               |
| Plate13H02 | Halofantrine hydrochloride             | Antimalarial                           | Antimalarial                             |            | -           | +             |                |              |               |
| Plate11G07 | Azacytidine-5                          | Antineoplastic                         | Antimetabolite                           | +/-        |             |               | +              |              | +             |
| Plate06H11 | Puromycin dihydrochloride              | Antiprotozoal                          | Antimetabolite                           |            | -           |               |                |              |               |
| Plate02B05 | Azathioprine                           | Immunosuppressant                      | Antimetabolite                           |            | -           |               |                |              |               |
| Plate10E06 | Ethoxyquin                             | Antifungal                             | Antioxydant                              |            | +/-         |               |                |              |               |
| Plate09G11 | Strophanthidin                         | Cardiotonic                            | ATPase inhibitor                         |            |             |               | +              |              | +             |
| Plate10C10 | Isoetharine mesylate salt              | Bronchodilator                         | Beta adrenergic agonist                  |            |             | -             |                |              |               |

|            |                                       |                           |                                                                                                 |     |   |   |   |   |
|------------|---------------------------------------|---------------------------|-------------------------------------------------------------------------------------------------|-----|---|---|---|---|
| Plate01G09 | Isoxsuprine hydrochloride             | Vasodilatator             | Beta adrenergic agonist                                                                         | -   | - |   |   |   |
| Plate05H02 | Terbutaline hemisulfate               | Bronchodilatator          | Beta adrenergic agonist (beta2)                                                                 |     | - |   |   |   |
| Plate01G10 | Acebutolol hydrochloride              | Antianginal               | Beta adrenergic antagonist (beta1)                                                              | -   | - |   |   |   |
| Plate14B08 | Oxprenolol hydrochloride              | Antihypertensor           | Beta adrenergic blocker                                                                         | -   |   |   |   |   |
| Plate12D02 | (+)-Isoproterenol (+)-bitartrate salt | Bronchodilatator          | Bronchodilatator                                                                                | +   |   |   | + |   |
| Plate02G05 | Loperamide hydrochloride              | Antidiarrhoeic            | Ca2+ channel antagonist                                                                         | -   |   |   |   |   |
| Plate01H09 | Thioridazine hydrochloride            | Neuroleptic               | Ca2+ channel antagonist                                                                         | -   |   |   |   |   |
| Plate05E09 | Bepidil hydrochloride                 | Antianginal               | Ca2+ channel blocker                                                                            | -   |   |   |   |   |
| Plate09D03 | (d,l)-Tetrahydroberberine             | Sedative                  | Ca2+ channel blocker                                                                            | -   |   |   |   |   |
| Plate04E07 | Perhexiline maleate                   | Vasodilatator             | Ca2+ channel blocker                                                                            | -   | - | + |   | + |
| Plate02F05 | Diltiazem hydrochloride               | Antianginal               | Ca2+ channel blocker (L-Type)                                                                   | -   |   |   |   |   |
| Plate06H09 | Felodipine                            | Antihypertensor           | Ca2+ channel blocker (L-Type)                                                                   | -   |   |   |   |   |
| Plate07H11 | Prenylamine lactate                   | Vasodilatator             | Ca2+ channel stimulation                                                                        | +/- |   |   |   | + |
| Plate01G04 | Nifedipine                            | Antihypertensor           | Ca2+ channels blocker (L type)                                                                  | -   | + |   |   |   |
| Plate01A05 | Metformin hydrochloride               | Antidiabetic              | cAMP/PKA                                                                                        | -   |   |   |   |   |
| Plate01A04 | Acetazolamide                         | Diuretic                  | Carbonic anhydrase inhibitor                                                                    | -   | + |   |   |   |
| Plate13C07 | Proscillaridin A                      | Cardiotonic               | Cardiac glycoside                                                                               |     |   | + |   | + |
| Plate14H09 | Cefepime hydrochloride                | Antibacterial             | Cell wall destruction agent                                                                     |     | - |   |   |   |
| Plate06G11 | Ceforanide                            | Antibacterial             | Cell wall synthesis inhibitor (bacterial)                                                       | +   |   |   |   |   |
| Plate01C09 | Ethambutol dihydrochloride            | Antibacterial             | Chelating agent                                                                                 | -   |   |   |   |   |
| Plate02E04 | Dehydrocholic acid                    | Choleretic                | Choleretic                                                                                      | -   |   |   |   |   |
| Plate05G05 | Probucol                              | Antihyperlipoproteine mic | Cholesterol downregulation                                                                      |     | - |   |   |   |
| Plate02A04 | Edrophonium chloride                  | Myasthenia Gravis test    | Cholinergic                                                                                     |     |   |   |   | + |
| Plate01F03 | Carbamazepine                         | Anticonvulsivant          | Cholinergic antagonist                                                                          | -   |   |   |   |   |
| Plate01E09 | Dicyclomine hydrochloride             | Antispasmodic             | cholinergic inhibition                                                                          | -   |   |   |   |   |
| Plate01H10 | Diphepanil methylsulfate              | Bronchodilatator          | cholinergic inhibition                                                                          | -   |   |   |   |   |
| Plate01H06 | Adiphenine hydrochloride              | Local anesthetic          | cholinergic inhibition                                                                          | -   | + |   |   |   |
| Plate02A03 | Cotinine (-)                          | Antidepressant            | cholinergic inhibition (and nicotinic inhibition)                                               |     |   |   |   | + |
| Plate02C08 | Tomatine                              | Antifungal                | Cholinergic inhibition (pH-dependent competitive inhibition of the enzyme acetylcholinesterase) | -   | - | - |   |   |
| Plate01F02 | Trichlorfon                           | Anthelminthic             | cholinergic inhibition Cholinesterase inhibitor                                                 | -   |   |   |   |   |
| Plate01C03 | Panthenol (D)                         | Vitamin                   | CoA synthesis precursor                                                                         | -   |   |   |   |   |
| Plate04H05 | Enalapril maleate                     | Antihypertensor           | Converting enzyme inhibitor                                                                     |     |   | + |   |   |
| Plate01C10 | Antipyrine                            | Analgesic                 | cyclooxygenase inhibition                                                                       | -   |   |   |   |   |
| Plate03E06 | Tolfenamic acid                       | Antiinflammatory          | cyclooxygenase inhibition                                                                       |     |   |   | + |   |
| Plate01D10 | Diflunisal                            | Antiinflammatory          | cyclooxygenase inhibition                                                                       | -   |   |   |   |   |
| Plate01E06 | Naproxen                              | Antiinflammatory          | cyclooxygenase inhibition                                                                       | -   |   |   |   |   |
| Plate01F05 | Mefenamic acid                        | Antiinflammatory          | cyclooxygenase inhibition                                                                       | -   |   |   |   |   |
| Plate01H04 | Sulindac                              | Antiinflammatory          | cyclooxygenase inhibition                                                                       | -   |   |   |   |   |
| Plate02B09 | Acetylsalicylic acid                  | Antiinflammatory          | cyclooxygenase inhibition                                                                       | -   |   |   |   |   |
| Plate10H02 | (R) -Naproxen sodium salt             | Antiinflammatory          | cyclooxygenase inhibition                                                                       | +   |   |   |   |   |
| Plate03F10 | Ketoprofen                            | Antiinflammatory          | cyclooxygenase inhibition                                                                       | -   |   |   |   |   |
| Plate07C09 | Resveratrol                           | Antiinflammatory          | cyclooxygenase inhibition                                                                       | +   |   |   |   |   |
| Plate10B11 | Ebselen                               | Antiinflammatory          | cyclooxygenase inhibition                                                                       | -   |   |   |   |   |

|            |                                            |                          |                                     |     |   |     |   |   |   |
|------------|--------------------------------------------|--------------------------|-------------------------------------|-----|---|-----|---|---|---|
| Plate11F07 | Tolmetin sodium salt dihydrate             | Antiinflammatory         | cyclooxygenase inhibition           | -   |   |     |   |   |   |
| Plate01E05 | Isoxicam                                   | Antiinflammatory         | cyclooxygenase inhibition           | -   | - |     |   |   |   |
| Plate11B07 | Suprofen                                   | Antiinflammatory         | cyclooxygenase inhibition           | +/- |   |     |   |   |   |
| Plate11D07 | Indoprofen                                 | Antiinflammatory         | cyclooxygenase inhibition           | +/- |   |     |   |   |   |
| Plate13E04 | Azapropazone                               | Anti-inflammatory        | cyclooxygenase inhibition           |     |   | +   |   |   |   |
| Plate14A10 | Oxyphenbutazone                            | Anti-inflammatory        | cyclooxygenase inhibition           | -   | - | +/- | + |   |   |
| Plate01C11 | Antipyrine, 4-hydroxy                      | Antipyrine metabolite    | cyclooxygenase inhibition           |     | - |     |   |   |   |
| Plate10H03 | Propidium iodide                           | Antibacterial            | Detergent                           |     |   |     |   |   | + |
| Plate09G09 | Benzethonium chloride                      | Antibacterial            | Detergent                           |     |   | -   |   |   |   |
| Plate10F08 | Alexidine dihydrochloride                  | Antibacterial            | Detergent                           |     | - | -   |   | + | + |
| Plate09G06 | Methyl benzethonium chloride               | Antibacterial            | Detergent                           | -   |   |     |   |   | + |
| Plate02G09 | Canrenoic acid potassium salt              | Antihypercholesterolemic | Detergent                           |     | - |     |   |   |   |
| Plate02G04 | Chlorhexidine                              | Bacteriostatic           | Detergent                           |     | - |     |   |   | + |
| Plate02A10 | Ursolic acid                               | Diuretic                 | Diuretic                            |     | - |     |   |   |   |
| Plate02A02 | Metronidazole                              | Antibacterial            | DNA damage (bacterial)              |     | - |     |   |   | + |
| Plate07B03 | Nitrofurural                               | Antibacterial            | DNA damage (bacterial)              | +   |   |     |   |   |   |
| Plate01D11 | Niclosamide                                | Anthelmintic             | DNA damage (Helminthic)             |     | - |     |   |   |   |
| Plate02A05 | Moroxidine hydrochloride                   | Antiviral                | DNA damage (viral DNA RNA)          |     | - |     |   |   |   |
| Plate07A08 | Daunorubicin hydrochloride                 | Antineoplastic           | DNA intercalating agent             |     | - |     | + |   | + |
| Plate14B07 | Trifluridine                               | Antiviral (ophthalmic)   | DNA replication inhibitor (viral)   |     | - |     |   |   |   |
| Plate01G07 | Minaprine dihydrochloride                  | Antidepressant           | Dopamine agonist                    |     | - |     |   |   |   |
| Plate02C02 | R(-) Apomorphine hydrochloride hemihydrate | Emetic                   | Dopamine agonist (D1)               |     | + |     |   |   |   |
| Plate08G09 | Salsolinol hydrobromide                    | -                        | Dopamine analog                     |     |   | -   |   |   |   |
| Plate01G05 | Chlorpromazine hydrochloride               | Antiemetic               | Dopamine antagonist                 |     | - |     |   |   |   |
| Plate08E02 | Scoulerine                                 | Antiemetic               | Dopamine antagonist                 |     | - |     |   |   | + |
| Plate02D06 | Haloperidol                                | Antipsychotic            | Dopamine antagonist                 |     | - |     |   |   |   |
| Plate02E06 | Perphenazine                               | Antipsychotic            | Dopamine antagonist                 |     | - |     |   |   |   |
| Plate02G10 | Thiopropazine dimesylate                   | Antipsychotic            | Dopamine antagonist                 |     | - |     |   |   |   |
| Plate02F03 | Loxapine succinate                         | Anxiolytic               | Dopamine antagonist                 |     | - |     |   |   |   |
| Plate01F04 | Triflupromazine hydrochloride              | Antipsychotic            | Dopamine antagonist ?               |     | - |     |   |   |   |
| Plate01H11 | Trimethobenzamide hydrochloride            | Antiemetic               | Dopamine antagonist (D2)            |     | - |     |   |   |   |
| Plate01F07 | Sulpiride                                  | Antipsychotic            | Dopamine antagonist (D2)            |     | - |     |   |   |   |
| Plate08B07 | Acetopromazine maleate salt                | Tranquilizer             | Dopamine antagonist ?               |     |   | +   |   |   |   |
| Plate02B08 | Disulfiram                                 | Alcohol deterrent        | Dopamine beta hydroxylase inhibitor | +   | - |     | + |   | + |
| Plate05G07 | GBR 12909 dihydrochloride                  | Antidepressant           | Dopamine uptake inhibitor           |     |   |     | + |   |   |
| Plate02C03 | Amoxapine                                  | Antidepressant           | Dopamine uptake inhibitor           |     | - |     |   |   |   |
| Plate02C09 | Nomifensine maleate                        | Antidepressant           | Dopamine uptake inhibitor           |     | - |     |   |   |   |
| Plate02D10 | Picotamide monohydrate                     | Antithrombotic           | Eicosenoid receptor antagonist      |     | - |     |   |   |   |
| Plate01G11 | Tolnaftate                                 | Antifungal               | Ergosterol synthesis inhibition     |     | - |     |   |   |   |
| Plate11A11 | Sulconazole nitrate                        | Antifungal               | Ergosterol synthesis inhibition     | -   |   |     |   |   |   |
| Plate01D06 | Dapsone                                    | Antiinflammatory         | Folic acid antagonist               |     | - |     |   |   |   |
| Plate01D08 | Pyrimethamine                              | Antiprotozoal            | Folic acid antagonist               |     | - |     |   |   |   |
| Plate02F06 | Methotrexate                               | anticancer               | Folic acid inhibitor                |     | - |     |   |   |   |
| Plate09G03 | Succinylsulfathiazole                      | Antibacterial            | Folic acid synthesis inhibition     | -   |   |     |   |   |   |
| Plate01A11 | Sulfaguandine                              | Antibacterial            | Folic acid synthesis inhibitor      |     | - |     |   |   |   |
| Plate01B05 | Sulfacetamide sodic hydrate                | Antibacterial            | Folic acid synthesis inhibitor      |     | - |     |   |   |   |

|            |                                   |                                              |                                               |     |     |   |   |  |   |
|------------|-----------------------------------|----------------------------------------------|-----------------------------------------------|-----|-----|---|---|--|---|
| Plate01B07 | Sulfathiazole                     | Antibacterial                                | Folic acid synthesis inhibitor                |     | -   |   |   |  |   |
| Plate01C02 | Sulfaphenazole                    | Antibacterial                                | Folic acid synthesis inhibitor                |     | -   |   |   |  |   |
| Plate01C04 | Sulfadiazine                      | Antibacterial                                | Folic acid synthesis inhibitor                |     | -   |   |   |  |   |
| Plate01G02 | Morantel tartrate                 | Anthelmintic                                 | Fumarate reductase inhibitor                  |     | -   | + |   |  |   |
| Plate08A10 | Dihydroergotoxine mesylate        | Anticonvulsant                               | GABA A receptor Cl-channel high affinity      | +   |     |   |   |  | + |
| Plate07F10 | Thiocolchicoside                  | Muscle relaxant                              | GABA agonist ?                                | +   |     |   |   |  |   |
| Plate09C03 | Gelsemine                         | Tumour inhibitor                             | GABA antagonist                               | -   |     |   |   |  |   |
| Plate09B03 | Picrotoxinin                      | Analeptic                                    | GABA channel blocker                          | -   |     |   |   |  |   |
| Plate11G02 | Gabapentin                        | Anticonvulsant                               | GABA receptor ligand                          | +   |     |   |   |  |   |
| Plate01D09 | Hexamethonium dibromide dihydrate | Antihypertensor                              | Ganglion blocker                              |     | -   |   |   |  |   |
| Plate02D11 | Triamcinolone                     | Antiinflammatory                             | glucocorticoid                                |     | -   |   |   |  |   |
| Plate01A07 | Isoflupredone acetate             | Anti-inflammatory                            | Glucocorticoid                                |     | -   | + |   |  |   |
| Plate09H09 | Fluorometholone                   | Glucocorticoid                               | Glucocorticoid                                |     |     | - |   |  |   |
| Plate01H08 | Prednisone                        | Glucocorticoid                               | Glucocorticoid                                |     | +   |   |   |  |   |
| Plate10G02 | Clobetasol propionate             | Glucocorticoid                               | Glucocorticoid                                |     | -   |   |   |  |   |
| Plate14H10 | Clocortolone pivalate             | Glucocorticoid                               | Glucocorticoid                                |     | -   |   |   |  |   |
| Plate10F02 | Alclometasone dipropionate        | Anti-inflammatory                            | glucocorticoid receptor agonist               |     |     | - |   |  |   |
| Plate02E07 | Mefloquine hydrochloride          | Antimalarial                                 | Heme polymerase inhibitor                     |     | +/- |   |   |  |   |
| Plate06H07 | Primaquine diphosphate            | Antimalarial                                 | Heme polymerase inhibitor                     |     | +/- | + | + |  | + |
| Plate01E04 | Betazole hydrochloride            | Gastric secretion stimulant                  | Histamine analog                              |     | -   |   |   |  |   |
| Plate11A08 | Chloropyramine hydrochloride      | Antihistaminic                               | Histamine antagonist (H1)                     |     |     | + |   |  |   |
| Plate01C08 | Doxylamine succinate              | Antihistaminic                               | Histamine antagonist (H1)                     |     | -   |   |   |  |   |
| Plate01F10 | Pheniramine maleate               | Antihistaminic                               | Histamine antagonist (H1)                     |     | -   |   |   |  |   |
| Plate01G06 | Diphenhydramine hydrochloride     | Antihistaminic                               | Histamine antagonist (H1)                     |     | -   |   |   |  |   |
| Plate02D08 | Chlorpheniramine maleate          | Antihistaminic                               | Histamine antagonist (H1)                     |     | -   |   |   |  |   |
| Plate02F04 | Hydroxyzine dihydrochloride       | Antihistaminic                               | Histamine antagonist (H1)                     |     | -   |   |   |  |   |
| Plate02F07 | Astemizole                        | Antihistaminic                               | Histamine antagonist (H1)                     |     | -   |   |   |  |   |
| Plate02F09 | Terfenadine                       | Antihistaminic                               | Histamine antagonist (H1)                     |     | -   |   |   |  |   |
| Plate02B04 | Azacyclonol                       | Anxiolytic                                   | Histamine antagonist (H1)                     |     | -   |   |   |  |   |
| Plate01C07 | Cimetidine                        | Antiulcer                                    | Histamine antagonist (H2)                     |     | -   |   |   |  |   |
| Plate02C05 | Famotidine                        | Antiulcerative                               | Histamine antagonist (H2)                     |     | -   |   |   |  |   |
| Plate06C09 | Roxatidine Acetate HCl            | Antiulcerative                               | Histamine antagonist (H2)                     | +   | +/- |   | + |  | + |
| Plate03B11 | Flutamide                         | Anticancer                                   | hormone androgen receptor antagonist          |     | -   |   |   |  |   |
| Plate09E09 | Estropipate                       | Estrogen                                     | Hormone estrogen                              |     |     | - |   |  |   |
| Plate11E07 | Ethinylestradiol 3-methyl ether   | Estrogen                                     | Hormone estrogen                              | +/- |     |   |   |  |   |
| Plate02C06 | Danazol                           | Antigonadotropin                             | hormone Estrogen antagonist                   |     | -   |   |   |  |   |
| Plate02B06 | Lynestrenol                       | Progestogen                                  | hormone estrogen inhibition                   |     | -   |   |   |  |   |
| Plate07H07 | Mycophenolic acid                 | Antineoplastic                               | Inosine monophosphate dehydrogenase inhibitor |     | +/- |   |   |  | + |
| Plate02E03 | Metanephine hydrochloride DL      |                                              | Isoprenaline uptake inhibitor extraneuronal   |     | -   |   |   |  |   |
| Plate02C07 | Nicorandil                        | Antihypertensor                              | K+ channel agonist (ATP-dependent channels)   |     | -   |   |   |  |   |
| Plate01F06 | Acetohexamide                     | Antidiabetic (type II, noninsulin-dependent) | K+ channel blocker (ATP-dependent channels)   |     | -   |   |   |  |   |
| Plate02F02 | Glipizide                         | Hypoglycemic                                 | K+ channel blocker (ATP-dependent channels)   |     | -   |   |   |  |   |



|            |                                    |                        |                                         |   |     |  |   |   |   |
|------------|------------------------------------|------------------------|-----------------------------------------|---|-----|--|---|---|---|
| Plate02D07 | Naltrexone hydrochloride dihydrate | Analgesic              | Opioid antagonist                       |   | -   |  |   |   |   |
| Plate02D02 | Naloxone hydrochloride             | Opiate antidote        | Opioid antagonist                       |   | -   |  |   |   |   |
| Plate02D09 | Nalbuphine hydrochloride           | Analgesic              | Opioid ligand                           |   | -   |  |   |   |   |
| Plate02E05 | Hesperetin                         |                        | P450 inhibitor                          |   | -   |  |   |   |   |
| Plate10F09 | Proadifen hydrochloride            | Local anesthetic       | P450 inhibitor (mono-oxygenases)        | - | -   |  |   |   |   |
| Plate05G10 | Ketoconazole                       | Antifungal             | P450 inhibitor (P450c17)                |   |     |  | + |   |   |
| Plate08C08 | Cilostazol                         | Antithrombotic         | Phosphodiesterase inhibitor             | + | +   |  | + |   | + |
| Plate01D04 | Diprophylline                      | Cardiac analeptic      | Phosphodiesterase inhibitor             |   | -   |  |   |   |   |
| Plate02B02 | Khellin                            | Phototherapeutic agent | Phototherapeutic agent                  |   | -   |  |   |   |   |
| Plate01A03 | Allantoin                          | Vulnerary              | Precipitate proteins                    |   |     |  | + |   |   |
| Plate01C05 | Norethynodrel                      | Progestogen            | Progesterone receptor agonist           |   | -   |  |   |   |   |
| Plate02E02 | Bromocryptine mesylate             | Antiparkinsonian       | Prolactin inhibitor                     |   | -   |  |   |   |   |
| Plate02G07 | Tamoxifen citrate                  | Anticancer             | Protein kinase C inhibitor              |   | -   |  |   |   | + |
| Plate08A11 | Emetine dihydrochloride            | Antiamebic             | Protein synthesis inhibitor             | + | +/- |  | + |   | + |
| Plate10G11 | Cycloheximide                      | Antibacterial          | Protein synthesis inhibitor             | + |     |  | + |   | + |
| Plate09E07 | Lycorine hydrochloride             | Antitumoral            | Protein translation inhibitor           | + |     |  | + |   | + |
| Plate01D02 | Chloramphenicol                    | Antibacterial          | Ribosomal peptidyltransferase inhibitor |   | -   |  |   |   |   |
| Plate01C06 | Thiamphenicol                      | Antibacterial          | Ribosomal protein synthesis inhibitor   |   | -   |  |   |   |   |
| Plate01D07 | Troleandomycin                     | Antibacterial          | Ribosomal protein synthesis inhibitor   |   | -   |  |   |   |   |
| Plate02F08 | Clindamycin hydrochloride          | Antibacterial          | Ribosomal protein synthesis inhibitor   |   | -   |  |   |   |   |
| Plate02F11 | Tetracycline hydrochloride         | Antibacterial          | Ribosomal protein synthesis inhibitor   |   | -   |  |   |   |   |
| Plate02G06 | Chlortetracycline hydrochloride    | Antibacterial          | Ribosomal protein synthesis inhibitor   |   | -   |  |   |   |   |
| Plate02H02 | Erythromycin                       | Antibacterial          | Ribosomal protein synthesis inhibitor   |   | -   |  |   |   |   |
| Plate02H03 | Oleandomycin phosphate             | Antibacterial          | Ribosomal protein synthesis inhibitor   |   | -   |  |   |   |   |
| Plate02H09 | Neomycin sulfate                   | Antibacterial          | Ribosomal protein synthesis inhibitor   |   | -   |  |   |   |   |
| Plate02H10 | Dihydrostreptomycin sulfate        | Antibacterial          | Ribosomal protein synthesis inhibitor   |   | -   |  |   |   |   |
| Plate02H11 | Gentamicine sulfate                | Antibacterial          | Ribosomal protein synthesis inhibitor   |   | -   |  |   |   |   |
| Plate13F10 | Tribenoside                        | Sclerosing agent       | Sclerosing agent                        | - | -   |  |   |   |   |
| Plate12A06 | Cantharidin                        | Rubefiant              | Serine protease releaser                |   |     |  | + | + |   |
| Plate02G11 | Dihydroergotamine tartrate         | Antimigraine           | Serotonin antagonist                    |   | -   |  |   |   |   |
| Plate05G08 | Carbetapentane citrate             | Antitussive            | Sigma1 receptor ligand                  |   |     |  | + |   |   |
| Plate02E08 | Isoconazole                        | Antibacterial          | Sterol 14-demethylase inhibitor         |   | -   |  |   |   |   |
| Plate01G08 | Miconazole                         | Antifungal             | Sterol 14-demethylase inhibitor         |   | -   |  |   |   |   |
| Plate01B03 | Benzonatate                        | Antitussive            | Stretch receptor sensitivity decrease   |   | -   |  |   |   |   |
| Plate01A09 | Amprolium hydrochloride            | Cocciostatic           | Thiamine transport inhibitor            |   | -   |  |   |   |   |
| Plate02D04 | Ciprofloxacin hydrochloride        | Anti-bacterial         | topoisomerase and gyrase inhibitor      |   | -   |  |   |   |   |
| Plate03D11 | Camptothecine (S,+)                | Antitumor agent        | Topoisomerase I inhibitor               |   |     |  | + |   |   |
| Plate03E05 | Flumequine                         | Antibacterial          | Topoisomerase II inhibitor              |   |     |  |   | + |   |
| Plate05G06 | Mitoxantrone dihydrochloride       | Antineoplastic         | topoisomerase II inhibitor              |   |     |  | + |   | + |
| Plate02D05 | Ampicillin trihydrate              | Antibacterial          | transpeptidase inhibitor (bacterial)    |   | -   |  |   |   |   |
| Plate02F10 | Cefotaxime sodium salt             | Antibacterial          | transpeptidase inhibitor (bacterial)    |   | -   |  |   |   |   |
| Plate01B08 | Levodopa                           | Antiparkinsonian       | Tyrosine aminotransferase inhibitor     |   | -   |  |   |   |   |
| Plate02C11 | Acenocoumarol                      | Anticoagulant          | Vitamin K antagonist                    |   | -   |  |   |   |   |
| Plate06F10 | Menadione                          | Vitamin K3             | Vitamin precursor                       |   | -   |  |   |   |   |



## Supplementary Table 7

| Compound name            | Structure                                                                         | Molecular Weight | Therapeutic group | Solubility mg/ml | PC3 6 h | PC3 36 h | H1299 6 h | H1299 36 h | HCT116 6 h | HCT116 36 h |
|--------------------------|-----------------------------------------------------------------------------------|------------------|-------------------|------------------|---------|----------|-----------|------------|------------|-------------|
| Oxyphenbutazone          | 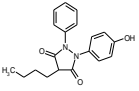 | 324.38285        | Anti-inflammatory | 25               | -       | -        | -         | -          | -          | -           |
| Paroxetine Hydrochloride |  | 365.83552        | Antidepressant    | 25               | Æ       | +        | Æ         | Æ          | Æ          | Æ           |
| Parbendazole             |  | 247.29934        | Anthelmintic      | 4                | Æ       | +        | Æ         | +          | Æ          | +           |
| Piperlongumine           |  | 317.34468        | Antifungal        | 20               | Æ       | Æ        | Æ         | +          | Æ          | +           |
| Digitoxigenin            |  | 374.52503        | Cardiotonic       | >125             | Æ       | Æ        | Æ         | +          | Æ          | +           |

2
